# Supplementary material for: Evidence of Gas Phase Glucosyl Transfer and Glycation in the CID/HCD-Spectra of S-Glucosylated Peptides
Source: Preprints.org preprint supplement (doi:10.20944/preprints202406.0285.v1), 2024-06-06
Supplement: Supplementary file 1 [file supplementary]

## Sheet: Content
Evidence of gas phase glucosyl transfer and glycation in the CID/HCD-spectra of S-glucosylated peptides
Alicja Buchowiecka
Institute of Molecular and Industrial Biotechnology, Lodz University of Technology; alicja.buchowiecka@p.lodz.pl
	Supplementary materials
	Exemplary working sheets
	Sheet 1	Content
	Sheet 2	C[+162]KGTDVQAWIR	z = +2	z = +3		CID
	Sheet 3	C[+162]KGTDVQAWIR	z = +2	z = +3		HCD
	Sheet 4	C[+162]ELAAAMK	z = +2			CID
	Sheet 5	RC[+162]ELAAAMK	z = +2			CID
	Sheet 6	WWC[+162]NDGR	z = +2			CID
	Sheet 7	SLGNWVC[+162]AAK	z = +2			CID
	Sheet 8	Neutral losses from molecular and precursor ions - S-glucopeptides of high Byonic score from different spectral libraries
		https://doi.org/10.1007/s00726-022-03208-7

## Sheet: CID_C +162 KGTDVQAWIR
						PID	Prot. Rank	Pos.	Sequence	Glycans	Mods (variable)	PEP	Score	z	Obs. m/z	Calc. m/z	Obs. MH	Calc. MH	ppm err.	Off- By-X	Cleavage	Delta Score	Delta Mod. Score	Protein Name	Fragment Type	Comment	Scan #	Scan Time	Glycans Pos.	Obs.M	Calc.M
						1603	1	133	R.C[+162.05282]KGTDVQAWIR.G		C1(Hex / 162.0528)	1.88e-05	354.2	2	719.85	719.853	1438.69	1438.7	-4.10461		Specific	354.198	354.198	>sp|P00698|LYSC_CHICK Lysozyme C OS=Gallus gallus GN=LYZ PE=1 SV=1	collision-induced dissociation	00527771buch_ab4liz2_s.6474.6474.2	controllerType=0 controllerNumber=1 scan=6474	34.2918		1437.69	1437.69
						1605	1	133	R.C[+162.05282]KGTDVQAWIR.G		C1(Hex / 162.0528)	2.92e-05	329.6	2	719.851	719.853	1438.69	1438.7	-3.93492		Specific	329.596	329.596	>sp|P00698|LYSC_CHICK Lysozyme C OS=Gallus gallus GN=LYZ PE=1 SV=1	collision-induced dissociation	00527771buch_ab4liz2_s.6481.6481.2	controllerType=0 controllerNumber=1 scan=6481	34.3151		1437.69	1437.69
						1606	1	133	R.C[+162.05282]KGTDVQAWIR.G		C1(Hex / 162.0528)	0.000106	189.2	3	480.236	480.238	1438.69	1438.7	-4.62158		Specific	189.152	189.152	>sp|P00698|LYSC_CHICK Lysozyme C OS=Gallus gallus GN=LYZ PE=1 SV=1	collision-induced dissociation	00527771buch_ab4liz2_s.6485.6485.3	controllerType=0 controllerNumber=1 scan=6485	34.3257		1437.69	1437.69
						https://proteomicsresource.washington.edu/cgi-bin/fragment.cgi
																															1.00727				fragmentation of C-term Arg derivative to imidazole structures
									R.TPGSRNLC[+162.05282]N.I
													b+		AA		y+		fragmentation of doubly and triply charged ions						cross-ring cleavage
													266.069	1	C	11
													394.164	2	K	10	1173.64
													451.186	3	G	9	1045.54
					C[+162]KGTDVQAWIR								552.233	4	T	8	988.521
													667.26	5	D	7	887.473
													766.329	6	V	6	772.446
													894.387	7	Q	5	673.378		H2O	2 H2O	3 H2O
													965.424	8	A	4	545.319		18.0106	36.0211	54.0317										ornityna na C-końcu
													1151.5	9	W	3	474.282														42 Da loss
													1264.59	10	I	2	288.203														42.0218
														11	R	1	175.119		162.053	150.053	120.042	90.0317									42.0218
																											54.0106		54.0106		42.0218
																			144.042	126.032	108.021	78.0106		24							42.0218
													pI: 8.22																		42.0218
													composition: C(55) H(87) N(17) O(15) S(1)																		42.0218
													neutral mass: 1437.692211																		42.0218
													+ 1 charge: 1438.699487																		42.0218
													+ 2 charge: 719.853382																		42.0218
													+ 3 charge: 480.238013																		42.0218
													+ 4 charge: 360.430329
													+ 5 charge: 288.545719
													+ 6 charge: 240.622645
													+ 7 charge: 206.391878
													+ 8 charge: 180.718803
													+ 9 charge: 160.750855
													+10 charge: 144.776498
																CID fragmentation of peptide with N-terminal, S-glucosylated Cysteine residue _ the evidence on the gas phase glycosyl transfer onto C-terminal Arg followed by Amadori product formation and its fragmentation yielding imidazole structures
																					Glycosyl transfer and glucopyranose cross ring cut (0.2A)								Postulated imidazole formation						Amadori product's fructopyranosyl ring fragmentation										Amadori product's dehydration pathway
												MODEL D	PID 1603		y+	y+		± 0.500 Da		y+	y+		± 0.500 Da	(0.2 A)	y+	y+		± 0.500 Da	(0.2 A)	y+	y+		± 0.500 Da		y+	y+		± 0.500 Da		y+	y+		± 0.500 Da		y+	y+		± 0.500 Da
												score 354.2	AA		calc.	obs.	int.	err.		162 gain	162 gain	int.	err.	120	42 gain	42 gain	int.	err.	42-18	24 gain	24 gain	int.	err.	162-90	72 gain	72 gain	int.	err.	162-150	12 gain	12 gain	int.	err.		144 gain	144 gain	int.	err.
												scan time:	C	11						calc.	obs.			tetrose loss	calc.	obs.				calc.	obs.			triose loss	calc.	obs.			pentose loss	calc.	obs.				calc.	obs.
												34.2918	K	10	1173.64	not obs.			162.053	1335.69	not obs.			42.0106	1215.65	not obs.			24	1197.64	not obs.			72.0211	1245.66	not obs.			12	1185.64	not obs.			144.042	1317.68	not obs.			126.032
												z+2	G	9	1045.54	1045.71	246100	0.16808	162.053	1207.6	1207.73	936.6	0.13586	42.0106	1087.55	not obs.			24	1069.54	not obs.			72.0211	1117.56	1117.55	1309	-0.012645	12	1057.54	not obs.			144.042	1189.58	not obs.			126.032
													T	8	988.521	988.713	28590	0.192344	162.053	1150.57	not obs.			42.0106	1030.53	1030.22	987.4	-0.308256	24	1012.52	not obs.			72.0211	1060.54	not obs.			12	1000.52	1000.54	142.1	0.016744	144.042	1132.56	not obs.			126.032
											911.473		D	7	887.473	887.637	43810	0.163422	162.053	1049.53	1049.13	356.1	-0.396598	42.0106	929.484	929.671	2587	0.187322	24	911.473	911.447	7707	-0.026578	72.0211	959.495	not obs.			12	899.473	899.87	3464	0.396622	144.042	1031.52	1031.73	351.5	0.219322	126.032
													V	6	772.446	772.595	112700	0.148365	162.053	934.499	not obs.			42.0106	814.457	not obs.			24	796.446	796.616	207.5	0.169365	72.0211	844.468	844.591	627	0.12334	12	784.446	not obs.			144.042	916.489	not obs.			126.032
													Q	5	673.378	673.504	58500	0.126079	162.053	835.431	835.23	1200	-0.200841	42.0106	715.389	not obs.			24	697.378	not obs.			72.0211	745.399	not obs.			12	685.378	685.79	3874	0.411579	144.042	817.42	not obs.			126.032
						calc.	obs.	int.	± 0.500 Da				A	4	545.319	545.434	42030	0.114257	162.053	707.372	not obs.			42.0106	587.33	587.556	52890	0.225757	24	569.319	569.092	9739	-0.227143	72.0211	617.341	617.172	960.2	-0.168968	12	557.319	not obs.			144.042	689.362	689.144	15640	-0.217643	126.032
			204 NL	from MH		1234.62	not obs.						W	3	474.282	474.381	34520	0.098571	162.053	636.335	636.065	10200	-0.270249	42.0106	516.293	516.288	3148	-0.004829	24	498.282	498.391	2163	0.108271	72.0211	546.303	546.452	13780	0.148546	12	486.282	486.164	1215	-0.118229	144.042	618.325	618.069	2760	-0.255729	126.032
			204 NL/z	from precursor ion		617.816	618.069	2760	0.25284				I	2	288.203	288.335	15400	0.131884	162.053	450.256	not obs.			42.0106	330.214	not obs.			24	312.203	312.416	2439	0.213284	72.0211	360.224	not obs.			12	300.203	300.349	957.7	0.146484	144.042	432.245	not obs.			126.032
			180 NL	from MH		1258.64	1259.09	1996	0.450615				R	1	175.119	not obs.			162.053	337.172	not obs.			42.0106	217.13	217.212	939.2	0.081948	24	199.119	not obs.			72.0211	247.14	247.225	314.7	0.085323	12	187.119	187.124	1003	0.005148	144.042	319.161	not obs.			126.032
			180 NL/z	from precursor ion		629.822	630.088	1996	0.265919								581650					12692.7					60551.6					22255.5					16990.9					10655.8					18751.5
			162 NL	from MH		1276.65	1276.76	9230	0.110735
			162 NL/z	from precursor ion		638.827	639.13	1848000	0.302929	a5												0.0218219					0.104103
			150 NL/z	from precursor ion		644.827	644.658	9300	-0.169159
			120 NL/z	from precursor ion		658.832	659.081	7923	0.248959															Amadori					Amadori					Amadori product's fructopyranosyl ring dehydratation
			90 NL/z	from precursor ion		674.838	674.681	22970	-0.156923			MODEL D	PID 1603		b+	b+	int.	± 0.500 Da	tetrose loss	120 loss b+	120 loss b+	int.	± 0.500 Da	triose loss	90 loss b+	90 loss b+	int.	± 0.500 Da	150	150 loss b+	150 loss b+	int.	± 0.500 Da	H20 loss	18 loss b+	18 loss b+		± 0.500 Da	2 H20 loss	36 loss b+	36 loss b+		± 0.500 Da	3 H20 loss	54 loss b+	54 loss b+		± 0.500 Da
												score 354.2	AA		calc.	obs. b+		err.	(0.2 A)	calc.	obs.		err.	90 loss	calc.	obs.		err.	pentose loss	calc.	obs.		err.		cal.	obs.	int.	err.		cal.	obs.	int	err.		cal.	obs.	int	err.
												scan time:	C	1	266.069	266.32	202.1	0.250819	120.042	146.027	NA			90.0317	176.038	NA			150.053	116.016	NA			18.0106	248.059	not obs.			36.0211	230.048	not obs.			54.0317	212.038	212.118	568.2	0.079914
												34.2918	K	2	394.164	394.247	20720	0.082356	120.042	274.122	274.192	3150	0.070316	90.0317	304.133	304.288	1045	0.155251	150.053	244.111	not obs.			18.0106	376.154	376.386	896.9	0.231921	36.0211	358.143	358.327	7161	0.183886	54.0317	340.133	340.306	5502	0.173551
												z+2	G	3	451.186	451.32	6698	0.133992	120.042	331.143	330.84	190.1	-0.303748	90.0317	361.154	361.409	7061	0.255087	150.053	301.133	301.328	497.6	0.195216	18.0106	433.175	433.464	721.6	0.288757	36.0211	415.165	415.384	2386	0.218922	54.0317	397.154	397.371	624.2	0.217087
													T	4	552.233	552.337	3427	0.103914	120.042	432.191	not obs.			90.0317	462.202	462.308	714.4	0.106109	150.053	402.181	402.27	372.6	0.089438	18.0106	534.223	not obs.			36.0211	516.212	516.288	3148	0.075844	54.0317	498.202	498.391	2963	0.188909
													D	5	667.26	667.247	60780	-0.013229	120.042	547.218	547.538	5272	0.319931	90.0317	577.229	577.262	661.7	0.033366	150.053	517.208	517.319	248	0.111295	18.0106	649.25	not obs.			36.0211	631.239	631.099	80350	-0.140599	54.0317	613.229	613.203	813.9	-0.026034
													V	6	766.329	766.392	5777	0.063357	120.042	646.286	645.827	10090	-0.459883	90.0317	676.297	676.473	9071	0.176252	150.053	616.276	616.477	3350	0.201381	18.0106	748.318	not obs.			36.0211	730.308	730.702	1836	0.394187	54.0317	712.297	712.428	173.5	0.130652
													Q	7	894.387	894.686	10870	0.299079	120.042	774.345	774.578	10640	0.233439	90.0317	804.356	not obs.			150.053	744.334	not obs.			18.0106	876.377	not obs.			36.0211	858.366	858.694	1051	0.328009	54.0317	840.356	840.549	2246	0.193874
													A	8	965.424	965.607	5582	0.182665	120.042	845.382	not obs.			90.0317	875.393	not obs.			150.053	815.372	815.783	942.4	0.411189	18.0106	947.414	not obs.			36.0211	929.403	929.671	2587	0.267995	54.0317	911.393	911.447	7707	0.05406
													W	9	1151.5	1151.66	5586	0.156852	120.042	1031.46	1031.73	351.5	0.273512	90.0317	1061.47	1061.76	7693	0.291947	150.053	1001.45	1001.66	211.4	0.207876	18.0106	1133.49	not obs.			36.0211	1115.48	1115.84	2755	0.361782	54.0317	1097.47	1097.79	1394	0.313247
													I	10	1264.59	1264.72	6222	0.136788	120.042	1144.55	1144.85	650.2	0.307948	90.0317	1174.56	1174.47	1890	-0.084517	150.053	1114.53	not obs.			18.0106	1246.58	1246.65	1728	0.074153	36.0211	1228.57	1228.78	2221	0.212618	54.0317	1210.56	1210.65	2698	0.093783
													R	11			125864					30343.8					28136.1					5622					3346.5					103495					24689.8		195633
																	1
															di-hexosyl					glucopyranose cross ring cut (0.2A)				Amadori					Amadori					Amadori product's fructopyranosyl ring dehydratation
												MODEL D	PID 1603	hexosyl	b+162	b+162	int.	± 0.500 Da	tetrose loss	120 loss b+	120 loss b+	int.	± 0.500 Da	triose loss	90 loss b+	90 loss b+	int.	± 0.500 Da	150	150 loss b+	150 loss b+	int.	± 0.500 Da	H20 loss	18 loss b+	18 loss b+		± 0.500 Da	2 H20 loss	36 loss b+	36 loss b+		± 0.500 Da	3 H20 loss	54 loss b+	54 loss b+		± 0.500 Da
										90.0317		score 354.2	AA	transfer	calc.	obs.		err.	(0.2 A)	calc.	obs.		err.	90 loss	calc.	obs.		err.	pentose loss	calc.	obs.		err.		cal.	obs.	int.	err.		cal.	obs.	int	err.		cal.	obs.	int	err.
						42.0106				150.053		scan time:	C	162.053	428.122	not obs.			120.042	146.027	NA			90.0317	176.038	NA			150.053	116.016	NA			18.0106	248.059	not obs.			36.0211	230.048	not obs.			54.0317	212.038	212.118	568.2	0.079914
												34.2918	K	162.053	556.217	556.498	316.9	0.281336	120.042	274.122	274.192	3150	0.070316	90.0317	304.133	304.288	1045	0.155251	150.053	244.111	not obs.			18.0106	376.154	376.386	896.9	0.231921	36.0211	358.143	358.277	19510	0.133686	54.0317	340.133	340.307	5502	0.173951
													G	162.053	613.239	613.594	42000	0.355072	120.042	331.143	not obs.			90.0317	361.154	361.384	830.5	0.230287	150.053	301.133	301.328	497.6	0.195216	18.0106	433.175	433.464	721.6	0.288757	36.0211	415.165	415.384	2386	0.218922	54.0317	397.154	397.371	624.2	0.217087
												z+2	T	162.053	714.286	not obs.			120.042	432.191	not obs.			90.0317	462.202	462.308	714.4	0.106109	150.053	402.181	402.27	372.6	0.089438	18.0106	534.223	not obs.	b4-18		36.0211	516.212	516.288	3148	0.075844	54.0317	498.202	498.391	2163	0.188909
													D	162.053	829.313	not obs.			120.042	547.218	547.538	5272	0.319931	90.0317	577.229	577.262	661.7	0.033366	150.053	517.208	517.319	248	0.111295	18.0106	649.25	not obs.	b5-18		36.0211	631.239	631.099	80350	-0.140599	54.0317	613.229	613.594	24000	0.364966
													V	162.053	928.382	not obs.			120.042	646.286	645.827	10090	-0.459883	90.0317	676.297	676.473	9071	0.176252	150.053	616.276	616.477	3350	0.201381	18.0106	748.318	not obs.			36.0211	730.308	730.702	1836	0.394187	54.0317	712.297	712.428	173.5	0.130652
													Q	162.053	1056.44	not obs.			120.042	774.345	774.578	10640	0.233439	90.0317	804.356	not obs.			150.053	744.334	not obs.			18.0106	876.377	not obs.	b7-18		36.0211	858.366	858.694	1051	0.328009	54.0317	840.356	840.549	2246	0.193874
													A	162.053	1127.48	1127.38	1987	-0.093455	120.042	845.382	not obs.			90.0317	875.393	not obs.			150.053	815.372	815.783	942.4	0.411189	18.0106	947.414	not obs.	b8-18		36.0211	929.403	929.671	2587	0.267995	54.0317	911.393	911.447	7707	0.05406
													W	162.053	1313.56	not obs.			120.042	1031.46	1031.73	351.5	0.273512	90.0317	1061.47	1061.47		0	150.053	1001.45	1001.45		0	18.0106	1133.49	1133.49		0	36.0211	1115.48	1115.48		0	54.0317	1097.47	1097.47		0
													I	162.053	1426.64	not obs.			120.042	1144.55	1144.85	650.2	0.307948	90.0317	1174.56	1174.56		0	150.053	1114.53	1114.53		0	18.0106	1246.58	1246.58		0	36.0211	1228.57	1228.57		0	54.0317	1210.56	1210.56		0
													R				44303.9					30153.7
																	1
																					Glycosyl transfer and glucopyranose cross ring cut (0.2A)								Postulated imidazole formation						Amadori product's fructopyranosyl ring fragmentation										Amadori product's dehydration pathway
																													hexosyl	b+162	b+162	int.	± 0.500 Da
																													transfer	calc.	obs.		err.
																	b++		AA		y++		pI: 8.22						162.053	428.122
																	133.538	1	C	11			composition: C(55) H(87) N(17) O(15) S(1)						162.053	556.217
																	197.586	2	K	10	587.322		neutral mass: 1437.692211						162.053	613.239
																	226.096	3	G	9	523.275		+ 1 charge: 1438.699487						162.053	714.286
																	276.62	4	T	8	494.764		+ 2 charge: 719.853382						162.053	829.313
																	334.134	5	D	7	444.24		+ 3 charge: 480.238013						162.053	928.382
																383.765	383.668	6	V	6	386.727		+ 4 charge: 360.430329						162.053	1056.44
																	447.697	7	Q	5	337.193		+ 5 charge: 288.545719						162.053	1127.48
																	483.216	8	A	4	273.163		+ 6 charge: 240.622645						162.053	1313.56
																	576.256	9	W	3	237.645		+ 7 charge: 206.391878						162.053	1426.64
																	632.798	10	I	2	144.605		+ 8 charge: 180.718803
																		11	R	1	88.0631		+ 9 charge: 160.750855
																							+10 charge: 144.776498
																										59.0483
																1310										221.101
																9578		10888			Glycosyl transfer and glucopyranose cross ring cut (0.2A)								Postulated imidazole formation						Amadori product's fructopyranosyl ring fragmentation										Amadori product's dehydration pathway
																10888
													PID 1606		y+	y+		± 0.500 Da		y+	y+		± 0.500 Da	(0.2 A)	y+	y+		± 0.500 Da	(0.2 A)	y+	y+		± 0.500 Da		y+	y+		± 0.500 Da		y+	y+		± 0.500 Da		y+	y+		± 0.500 Da
												MODEL D	AA		calc.	obs.	int.	err.		162 gain	162 gain	int.	err.	120	42 gain	42 gain	int.	err.	42-18	24 gain	24 gain	int.	err.	162-90	72 gain	72 gain	int.	err.	162-150	12 gain	12 gain	int.	err.		144 gain	144 gain	int.	err.
												score 189.2	C	11						calc.	obs.			tetrose loss	calc.	obs.				calc.	obs.			triose loss	calc.	obs.			pentose loss	calc.	obs.				calc.	obs.
												scan time:	K	10	1173.64	not obs.			162.053	1335.69	not obs.			42.0106	1215.65	not obs.			24	1197.64	not obs.			72.0211	1245.66	not obs.			12	1185.64	not obs.			144.042	1317.68	not obs.			126.032
												34.3257	G	9	1045.54	not obs.			162.053	1207.6	not obs.			42.0106	1087.55	not obs.			24	1069.54	not obs.			72.0211	1117.56	not obs.			12	1057.54	not obs.			144.042	1189.58	not obs.			126.032
												z+3	T	8	988.521	not obs.			162.053	1150.57	not obs.			42.0106	1030.53	1030.37	464	-0.160456	24	1012.52	1012.83	1605	0.307644	72.0211	1060.54	not obs.			12	1000.52	not obs.			144.042	1132.56	not obs.			126.032
													D	7	887.473	not obs.			162.053	1049.53	not obs.			42.0106	929.484	not obs.			24	911.473	not obs.			72.0211	959.495	not obs.			12	899.473	899.619	817.7	0.145722	144.042	1031.52	not obs.			126.032
													V	6	772.446	772.581	3408	0.134965	162.053	934.499	not obs.			42.0106	814.457	not obs.			24	796.446	796.598	402.9	0.151965	72.0211	844.468	not obs.			12	784.446	784.627	2374	0.180665	144.042	916.489	not obs.			126.032
													Q	5	673.378	673.483	83460	0.105179	162.053	835.431	not obs.			42.0106	715.389	715.47	1796	0.081679	24	697.378	697.656	341.4	0.277579	72.0211	745.399	not obs.			12	685.378	not obs.			144.042	817.42	not obs.			126.032
													A	4	545.319	545.429	335600	0.109957	162.053	707.372	not obs.			42.0106	587.33	587.614	8672	0.283457	24	569.319	not obs.			72.0211	617.341	617.366	350.3	0.025732	12	557.319	not obs.			144.042	689.362	not obs.			126.032
													W	3	474.282	not obs.			162.053	636.335	636.602	1310	0.266551	42.0106	516.293	516.379	1997	0.086071	24	498.282	498.559	4255	0.276871	72.0211	546.303	546.453	73210	0.149546	12	486.282	486.392	4333	0.109271	144.042	618.325	618.789	5286	0.464171	126.032
													I	2	288.203	288.385	47440	0.182184	162.053	450.256	450.283	9578	0.027064	42.0106	330.214	330.452	19080	0.238584	24	312.203	312.11	7655	-0.092816	72.0211	360.224	not obs.			12	300.203	300.596	23200	0.393084	144.042	432.245	432.043	5837	-0.202516	126.032
													R	1	175.119	175.135	37640	0.016348	162.053	337.172	337.415		0.243328	42.0106	217.13	217.237	417	0.107148	24	199.119	199.175	516.1	0.056148	72.0211	247.14	not obs.			12	187.119	187.087	7278	-0.032452	144.042	319.161	not obs.			126.032
																	507548			misassigned as y5++		10888					32426					14775.4					73560.3					38002.7					11123
																total abindance	1			94970	rel. abundance	0.0214522					0.0638876					0.0291113					0.144933					0.0748751					0.0219152
																						1					2.97814					1.35704					6.75609					3.49033					1.02158
			calc.	obs.	int.	± 0.500 Da	loss	PID 1606																21.0053										36.0106										72.0212					63.0159
							hexose	z +3					PID 1606		y++	y++		± 0.500 Da		y++	y++		± 0.500 Da	(0.2 A)	y++	y++		± 0.500 Da	(0.2 A)	y++	y+		± 0.500 Da		y++	y++		± 0.500 Da		y++	y++		± 0.500 Da		y++	y++		± 0.500 Da
179 NL	from precursor ion		420.545	420.788	45840	0.243219	from Arg	Amadori					AA		calc.	obs.	int.	err.		162 gain	162 gain	int.	err.	120	42 gain	42 gain	int.	err.	42-18	24 gain	24 gain	int.	err.	162-90	72 gain	72 gain	int.	err.	162-150	12 gain	12 gain	int.	err.		144 gain	144 gain	int.	err.
162 NL	from precursor ion		426.22	426.442	103000	0.221116							C	11						calc.	obs.			tetrose loss	calc.	obs.				calc.	obs.			triose loss	calc.	obs.			pentose loss	calc.	obs.				calc.	obs.
150 NL	from precursor ion		430.22	430.164	0.0559978	-0.0559978	pentose	Amadori					K	10	587.322	587.614	8672	0.29112	81.0264	668.349	668.497	7107	0.14831	21.0053	608.328	608.716	267.9	0.38872	12	599.322	not obs.			36.0106	623.333	not obs.			6	593.322	593.455	244.1	0.13242	72.0212	659.344	659.513	21890	0.16897	63.0159
120 NL	from precursor ion		440.224	440.202	0.0222192	-0.0222192	tetrose						G	9	523.275	not obs.			81.0264	604.301	604.524	34350	0.222192	21.0053	544.28	not obs.			12	535.275	534.86	1922	-0.415198	36.0106	559.285	559.52	800.3	0.234639	6	529.275	529.28	4444	0.005602	72.0212	595.296	not obs.			63.0159
90 NL	from precursor ion		450.227	450.283	0.0554592	0.0554592	triose	Amadori					T	8	494.764	not obs.			81.0264	575.791	575.383	4413	-0.407776	21.0053	515.769	not obs.			12	506.764	506.392	6240	-0.372066	36.0106	530.775	not obs.			6	500.764	500.444	7797	-0.319966	72.0212	566.785	566.533	4267	-0.252816	63.0159
204 NL	from precursor ion		412.213	412.39	3890	0.176768	from Arg	Amadori					D	7	444.24	444.387	26430	0.146573	81.0264	525.267	525.066	3512	-0.200637	21.0053	465.246	not obs.			12	456.24	not obs.			36.0106	480.251	not obs.			6	450.24	450.283	9578	0.042573	72.0212	516.261	516.379	1997	0.117523	63.0159
219 NL	from precursor ion		407.21	407.507	1824	0.297594	from Arg	Amadori					V	6	386.727	386.971	91670	0.244145	81.0264	467.753	not obs.			21.0053	407.732	407.507	1824	-0.225055	12	398.727	398.338	3092	-0.388755	36.0106	422.737	422.466	7663	-0.271917	6	392.727	393.123	29070	0.396445	72.0212	458.748	not obs.			63.0159
													Q	5	337.193	337.415	94970	0.222451	81.0264	418.219	418.572	5693	0.353041	21.0053	358.198	358.05	15670	-0.147749	12	349.193	349.115	3063	-0.077849	36.0106	373.203	373.305	2941	0.101588	6	343.193	343.228	5400	0.035251	72.0212	409.214	not obs.			63.0159
													A	4	273.163	273.251	39550	0.08724	81.0264	354.19	354.442	687.2	0.25193	21.0053	294.169	294.346	14410	0.17724	12	285.163	285.208	22040	0.04444	36.0106	309.174	309.607	3195	0.432678	6	279.163	not bos.			72.0212	345.185	345.303	2655	0.11879	63.0159
180 NL	from MH		1258.64	not obs.			hexose						W	3	237.645	237.854	10180	0.209097	81.0264	318.671	not obs.			21.0053	258.65	258.169	19620	-0.480903	12	249.645	249.475	214.6	-0.169503	36.0106	273.655	273.908	14100	0.252634	6	243.645	not bos.			72.0212	309.666	309.607	3195	-0.059353	63.0159
180 NL	from precursor ion		420.217	not obs.									I	2	144.605	144.998	31430	0.392854	81.0264	225.632	225.24	1904	-0.391056	21.0053	165.61	165.168	792.1	-0.442746	12	156.605	not obs.			36.0106	180.616	not obs.			6	150.605	not bos.			72.0212	216.626	216.49	343.8	-0.136596	63.0159
162 NL	from MH		1276.65	not obs.			hexosyl						R	1	88.0631	NA			81.0264	169.09	169.172	2963	0.082776	21.0053	109.068	NA			12	100.063	NA			36.0106	124.074	124.118	251.5	0.0445235	6	94.0631	NA			72.0212	160.084	160.146	383.3	0.061736	63.0159
																	302902					60629.2					52584					36571.6					28950.8					56533.1					34731.1
																	1					0.200161					0.173601					0.120737					0.0955781					0.186638					0.114661
																						1					0.867305					0.603201					0.477506					0.93244					0.572844
																																		18.0106						36.0211				54.0317
																													Amadori					Amadori product's fructopyranosyl ring dehydratation
													PID 1606		b+	b+	int.	± 0.500 Da	tetrose loss	120 loss b+	120 loss b+	int.	± 0.500 Da	triose loss	90 loss b+	90 loss b+	int.	± 0.500 Da	pentose loss	150 loss b+	150 loss b+	int.	± 0.500 Da	H20 loss	18 loss b+	18 loss b+		± 0.500 Da	2 H20 loss	36 loss b+	36 loss b+		± 0.500 Da	3 H20 loss	54 loss b+	54 loss b+		± 0.500 Da
												MODEL D	AA		calc.	obs. b+		err.		calc.	obs.		err.	from Amadori	calc.	obs.		err.	from Amadori	calc.	obs.		err.		cal.	obs.	int.	err.		cal.	obs.	int	err.		cal.	obs.	int	err.
												score 189.2	C	1	266.069	266.311	5054	0.241619	120.042	146.027	146.217	307.4	0.190079	90.0317	176.038	176.306	1938	0.268614	150.053	116.016	NA			18.0106	248.059	248.347	163.7	0.288584	36.0211	230.048	230.158	1054	0.109549	54.0317	212.038	212.066	452	0.028014
												scan time:	K	2	394.164	393.902	22300	-0.262444	120.042	274.122	273.908	14100	-0.213984	90.0317	304.133	303.981	3253	-0.151149	150.053	244.111	244.191	523.6	0.07988	18.0106	376.154	376.352	1294	0.198221	36.0211	358.143	358.05	15670	-0.092914	54.0317	340.133	340.509	1382	0.376251
												34.3257	G	3	451.186	451.137	4499	-0.048908	120.042	331.143	331.546	16040	0.402852	90.0317	361.154	361.209	2329	0.055187	150.053	301.133	301.284	4101	0.151416	18.0106	433.175	not obs.			36.0211	415.165	not obs.			54.0317	397.154	397.418	3664	0.264487
												z+3	T	4	552.233	552.881	7647	0.647314	120.042	432.191	432.043	5837	-0.148326	90.0317	462.202	not obs.			150.053	402.181	402.44	83540	0.259938	18.0106	534.223	not obs.			36.0211	516.212	516.379	1997	0.166744	54.0317	498.202	498.559	4255	0.357509
													D	5	667.26	667.42	29910	0.159571	120.042	547.218	547.463	4808	0.244931	90.0317	577.229	577.458	3376	0.229466	150.053	517.208	517.41	9837	0.202195	18.0106	649.25	b5-18	3491		36.0211	631.239	631.019	60910	-0.220499	54.0317	613.229	613.395	6291	0.166066
													V	6	766.329	766.42	40680	0.091157	120.042	646.286	646.004	4922	-0.282683	90.0317	676.297	676.436	2157	0.138852	150.053	616.276	616.335	1122	0.059181	18.0106	748.318	b6-18	2273		36.0211	730.308	730.648	7268	0.340687	54.0317	712.297	712.337	3205	0.039852
													Q	7	894.387	894.612	9005	0.224579	120.042	774.345	774.487	2108	0.142339	90.0317	804.356	804.586	2637	0.230674	150.053	744.334	743.87	377.8	-0.464897	18.0106	876.377	b7-18	218.6		36.0211	858.366	not obs.			54.0317	840.356	not obs.
													A	8	965.424	965.693	4190	0.268165	120.042	845.382	845.611	1931	0.228625	90.0317	875.393	875.625	414	0.23236	150.053	815.372	not obs.			18.0106	947.414	b8-18	517.1		36.0211	929.403	not obs.			54.0317	911.393	911.697	409.8	0.30416
													W	9	1151.5	not obs.			120.042	1031.46	not obs.			90.0317	1061.47	not obs.			150.053	1001.45	not obs.			18.0106	1133.49	not obs.			36.0211	1115.48	not obs.			54.0317	1097.47	not obs.
													I	10	1264.59	not obs.			120.042	1144.55	not obs.			90.0317	1174.56	not obs.			150.053	1114.53	not obs.			18.0106	1246.58	not obs.			36.0211	1228.57	not obs.			54.0317	1210.56	not obs.
													R	11			123285					50053.4					16104					99501.4					7957.4					86899					19658.8
																	1					0.405997					0.130624					0.807084					0.0645448					0.704863					0.159458
																			120.042					90.0317					150.053
																			60.0211					45.0158					75.0264					9.00528					18.0106					27.0158
													PID 1606		b++	b++	int.	± 0.500 Da	tetrose loss	120 loss b++	120 loss b++	int.	± 0.500 Da	triose loss	90 loss b++	90 loss b++	int.	± 0.500 Da	pentose loss	150 loss b++	150 loss b++	int.	± 0.500 Da	H20 loss	18 loss b++	18 loss b+		± 0.500 Da	2 H20 loss	36 loss b++	36 loss b++		± 0.500 Da	3 H20 loss	54 loss b++	54 loss b++		± 0.500 Da
							obs.	int.	± 0.500 Da			MODEL D	AA		calc.	obs. b+		err.		calc.	obs.		err.	from Amadori	calc.	obs.		err.	from Amadori	calc.	obs.		err.		cal.	obs.	int.	err.		cal.	obs.	int	err.		cal.	obs.	int	err.
						calc.	not obs.					score 189.2	C	1	133.538	not obs.			60.0211	73.5171	NA			45.0158	88.5224	NA			75.0264	58.5119	NA			9.00528	124.533	124.118	251.5	-0.414796	18.0106	115.528	NA			27.0158	106.522	NA
			204 NL	from MH		1234.62	412.39	3892	0.176768			scan time:	K	2	197.586	not obs.			60.0211	137.565	not obs.			45.0158	152.57	152.081	230.5	-0.489112	75.0264	122.559	NA			9.00528	188.58	not obs.			18.0106	179.575	not obs.			27.0158	170.57	170.125	833.3	-0.444512
			204 NL/z	from precursor ion		412.213	not obs.					34.3257	G	3	226.096	not obs.			60.0211	166.075	not obs.			45.0158	181.081	181.184	498.7	0.103656	75.0264	151.07	not os.			9.00528	217.091	217.237	417	0.14549	18.0106	208.086	not obs.			27.0158	199.081	199.175	516.1	0.0944555
			180 NL	from MH		1258.64	not obs.					z+3	T	4	276.62	not obs.			60.0211	216.599	216.49	343.8	-0.109501	45.0158	231.604	not obs.			75.0264	201.594	not obs.			9.00528	267.615	267.291	776.1	-0.324548	18.0106	258.61	258.222	6832	-0.387866	27.0158	249.604	249.475	214.6	-0.129184
			180 NL/z	from precursor ion		420.217	not obs.						D	5	334.134	334.599	3662	0.464997	60.0211	274.113	273.908	14100	-0.204673	45.0158	289.118	289.332	5902	0.213545	75.0264	259.107	not obs.			9.00528	325.129	325.421	304.6	0.29248	18.0106	316.123	not obs.			27.0158	307.118	307.471	2116	0.352944
			162 NL	from MH		1276.65	426.442	101000	0.221094				V	6	383.668	383.765	42000	0.09699	60.0211	323.647	323.598	8579	-0.04908	45.0158	338.652	338.347	6059	-0.305462	75.0264	308.642	308.425	263.5	-0.216698	9.00528	374.663	375.058	11260	0.395473	18.0106	365.657	365.506	1975	-0.151145	27.0158	356.652	356.457	168	-0.195662
			162 NL/z	from precursor ion		426.22	430.164	25760	-0.0559978				Q	7	447.697	447.931	320700	0.233801	60.0211	387.676	388.034	26690	0.358031	45.0158	402.681	402.44	83540	-0.240951	75.0264	372.671	372.283	1452	-0.387887	9.00528	438.692	439.158	74140	0.466384	18.0106	429.687	430.164	25760	0.477666	27.0158	420.681	420.788	45840	0.106649
			150 NL/z	from precursor ion		430.22	440.202	40840	-0.0222192				A	8	483.216	not obs.			60.0211	423.195	not obs.			45.0158	438.2	not obs.			75.0264	408.189	not obs.			9.00528	474.211	not obs.			18.0106	465.205	not obs.			27.0158	456.2	not obs.
			120 NL/z	from precursor ion		440.224	450.283	9578	0.0554592				W	9	576.256	not obs.			60.0211	516.234	not obs.			45.0158	531.24	531.443	263.4	0.203236	75.0264	501.229	501.181	4218	-0.0481	9.00528	567.25	567.549	7364	0.298471	18.0106	558.245	not obs.			27.0158	549.24	not obs.
			90 NL/z	from precursor ion		450.227							I	10	632.798	not obs.			60.0211	572.776	572.687	3029	-0.089214	45.0158	587.782	587.614	8672	-0.168197	75.0264	557.771	557.943	3223	0.172268	9.00528	623.792	not obs.			18.0106	614.787	614.83	1064	0.043321	27.0158	605.782	605.48	4600	-0.301397
													R	11			366362					52741.8					105166					9156.5					94513.2					35631					54288
																	1					0.143961					0.287054					0.024993					0.257978					0.0972563					0.148181
														266.069								0.143961
														428.122	dihexosyl
																				glucopyranose cross ring cut (0.2A)				Amadori					Amadori					Amadori product's fructopyranosyl ring dehydratation
												MODEL D	PID 1606	hexosyl	b+162	b+162	int.	± 0.500 Da	tetrose loss	120 loss b+	120 loss b+	int.	± 0.500 Da	triose loss	90 loss b+	90 loss b+	int.	± 0.500 Da	150	150 loss b+	150 loss b+	int.	± 0.500 Da	H20 loss	18 loss b+	18 loss b+		± 0.500 Da	2 H20 loss	36 loss b+	36 loss b+		± 0.500 Da	3 H20 loss	54 loss b+	54 loss b+		± 0.500 Da
												score 189.2	AA	transfer	calc.	obs.		err.	(0.2 A)	calc.	obs.		err.	90 loss	calc.	obs.		err.	pentose loss	calc.	obs.		err.		cal.	obs.	int.	err.		cal.	obs.	int	err.		cal.	obs.	int	err.
												scan time:	C	162.053	428.122	428.471	3845	0.348899	120.042	308.08	308.425	263.5	0.345059	90.0317	338.09	338.347	6059	0.256294	150.053	278.069	278.479	1634	0.409523	18.0106	410.112	409.908	1201	-0.203136	36.0211	392.101	392.127	22870	0.026529	54.0317	374.09	373.953	5947	-0.137106
												34.3257	K	162.053	556.217	556.497	1377	0.279536	120.042	436.175	435.835	12890	-0.340104	90.0317	466.185	not obs.			150.053	406.164	406.168	8635	0.00336	18.0106	538.206	538.429	3641	0.222301	36.0211	520.196	not obs.			54.0317	502.185	502.118	2263	-0.067269
												z+3	G	162.053	613.239	613.395	6291	0.156172	120.042	493.196	not obs.			90.0317	523.207	not obs.			150.053	463.186	463.335	608.7	0.149196	18.0106	595.228	595.132	3210	-0.095763	36.0211	577.217	577.458	3376	0.240702	54.0317	559.207	559.52	800.3	0.313267
													T	162.053	714.286	714.647	3787	0.360494	120.042	594.244	not obs.			90.0317	624.255	624.386	3287	0.131789	150.053	564.233	564.195	1734	-0.038582	18.0106	696.276	not obs.			36.0211	678.265	not obs.			54.0317	660.255	660.49	9572	0.235689
													D	162.053	829.313	829.673	666.3	0.359751	120.042	709.271	not obs.			90.0317	739.281	not obs.			150.053	679.26	not obs.			18.0106	811.303	811.125	1090	-0.177184	36.0211	793.292	not obs.			54.0317	775.281	775.532	1677	0.250246
													V	162.053	928.382	not obs.			120.042	808.339	807.947	999.9	-0.392303	90.0317	838.35	not obs.			150.053	778.329	778.573	5746	0.244761	18.0106	910.371	not obs.			36.0211	892.36	not obs.			54.0317	874.35	not obs.
													Q	162.053	1056.44	not obs.			120.042	936.398	not obs.			90.0317	966.408	966.77	1758	0.361654	150.053	906.387	not obs.			18.0106	1038.43	not obs.			36.0211	1020.42	not obs.			54.0317	1002.41	not obs.
													A	162.053	1127.48	not obs.			120.042	1007.43	not obs.			90.0317	1037.45	not obs.			150.053	977.424	not obs.			18.0106	1109.47	not obs.			36.0211	1091.46	not obs.			54.0317	1073.45	not obs.
													W	162.053	1313.56	not obs.			120.042	1193.51	not obs.			90.0317	1223.52	not obs.			150.053	1163.5	not obs.			18.0106	1295.55	not obs.			36.0211	1277.54	not obs.			54.0317	1259.52	not obs.
													I	162.053	1426.64	not obs.			120.042	1306.6	not obs.			90.0317	1336.61	not obs.			150.053	1276.59	not obs.			18.0106	1408.63	not obs.			36.0211	1390.62	not obs.			54.0317	1372.61	not obs.
													R				15966.3					14153.4					11104					18357.7					9142					26246					20259.3
																	0.129507					0.114802					0.0900677					0.148905
																	1					0.886455					0.695465					1.14978					0.572581					1.64384					1.26888
															dihexosyl
														162.053					120.042					90.0317					150.053
														81.0264	162 gain				60.0211					45.0158					75.0264					#VALUE!					#VALUE!					#VALUE!
													PID 1606		b++	b++	int.	± 0.500 Da	tetrose loss	120 loss b++	120 loss b++	int.	± 0.500 Da	triose loss	90 loss b++	90 loss b++	int.	± 0.500 Da	pentose loss	150 loss b++	150 loss b++	int.	± 0.500 Da	H20 loss	18 loss b++	18 loss b+		± 0.500 Da	2 H20 loss	36 loss b++	36 loss b++		± 0.500 Da	3 H20 loss	54 loss b++	54 loss b++		± 0.500 Da
												MODEL D	AA		calc.	obs. b+		err.		calc.	obs.		err.	from Amadori	calc.	obs.		err.	from Amadori	calc.	obs.		err.		cal.	obs.	int.	err.		cal.	obs.	int	err.		cal.	obs.	int	err.
												score 189.2	C	81.0264	214.565	214.247	2129	-0.317689	60.0211	154.544	not obs.			45.0158	169.549	169.172	2963	-0.376541	75.0264	139.538	not obs.			9.00528	205.559	not obs.			18.0106	196.554	not obs.			27.0158	187.549	187.087	7278	-0.462341
												scan time:	K	81.0264	278.612	278.479	1634	-0.13337	60.0211	218.591	not obs.			45.0158	233.596	233.228	717.8	-0.368622	75.0264	203.586	203.09	1182	-0.495858	9.00528	269.607	269.317	241	-0.289387	18.0106	260.602	260.326	934.1	-0.275605	27.0158	251.596	not obs.
												34.3257	G	81.0264	307.123	307.471	2116	0.347998	60.0211	247.102	not obs.			45.0158	262.107	not obs.			75.0264	232.096	232.267	10300	0.17011	9.00528	298.118	298.312	1043	0.194581	18.0106	289.112	289.332	5902	0.219163	27.0158	280.107	not obs.
												z+3	T	81.0264	357.647	not obs.			60.0211	297.626	297.368	440.7	-0.258111	45.0158	312.631	not obs.			75.0264	282.62	282.286	9890	-0.334229	9.00528	348.641	349.115	3063	0.473342	18.0106	339.636	339.37	1829	-0.265976	27.0158	330.631	330.452	19080	-0.178694
													D	81.0264	415.16	not obs.			60.0211	355.139	not obs.			45.0158	370.144	370.468	11910	0.324034	75.0264	340.134	340.509	1382	0.374999	9.00528	406.155	406.168	8635	0.0126695	18.0106	397.15	397.418	3664	0.268852	27.0158	388.144	388.034	26690	-0.110165
													V	81.0264	464.694	464.456	4326	-0.23842	60.0211	404.673	not obs.			45.0158	419.679	419.337	5695	-0.341972	75.0264	389.668	not obs.			9.00528	455.689	not obs.			18.0106	446.684	446.659	14390	-0.024755	27.0158	437.679	437.492	4180	-0.186372
													Q	81.0264	528.724	not obs.			60.0211	468.703	not obs.			45.0158	483.708	not obs.			75.0264	453.697	not obs.			9.00528	519.718	519.259	5434	-0.459026	18.0106	510.713	510.454	1653	-0.259544	27.0158	501.708	not obs.
													A	81.0264	564.242	564.195	1734	-0.047466	60.0211	504.221	not obs.			45.0158	519.226	519.259	5434	0.0329815	75.0264	489.216	489.309	445.7	0.092746	9.00528	555.237	555.602	4378	0.365116	18.0106	546.232	546.395	70390	0.163699	27.0158	537.226	537.695	2904	0.468682
													W	81.0264	657.282	657.551	6665	0.269378	60.0211	597.261	597.149	3368	-0.111292	45.0158	612.266	612.13	152.9	-0.136274	75.0264	582.256	582.353	8034	0.09729	9.00528	648.277	648.566	6136	0.288961	18.0106	639.271	639.097		-0.174157	27.0158	630.266	630.338	107800	0.0715255
													I	81.0264	713.824	not obs.			60.0211	653.803	654.3	386.5	0.497176	45.0158	668.808	668.497	7107		75.0264	638.798	not			9.00528	704.819	704.417	1750	-0.401771	18.0106	695.813	695.564	789.1	-0.248889	27.0158	686.808	686.441	439.7	-0.367506
													R				12725					4195.2					33979.7					31233.7					30680					99551.2					168372
																	1					0.329682					2.67031					2.45451					2.411					7.82328					13.2316
																																									assigned as a5
																																									1861000
																										calc.	obs.	int.	± 0.500 Da	loss	PID 1606
																														hexose	z +3
																							179 NL	from precursor ion		420.545	420.788	45840	0.243219	from Arg	Amadori
																							162 NL	from precursor ion		426.22	426.442	103000	0.221116
																							150 NL	from precursor ion		430.22	430.164	0.0559978	-0.0559978	pentose	Amadori
																							120 NL	from precursor ion		440.224	440.202	0.0222192	-0.0222192	tetrose
																							90 NL	from precursor ion		450.227	450.283	0.0554592	0.0554592	triose	Amadori
																							204 NL	from precursor ion		412.213	412.39	3890	0.176768	from Arg	Amadori
																							219 NL	from precursor ion		407.21	407.507	1824	0.297594	from Arg	Amadori
																							180 NL	from MH		1258.64	not obs.			hexose
																							180 NL	from precursor ion		420.217	not obs.
																							162 NL	from MH		1276.65	not obs.			hexosyl
[truncated: 19 more columns]

## Sheet: HCD_C +162 KGTDVQAWIR
						PID	Prot. Rank	Pos.	Sequence	Glycans	Mods (variable)	PEP	Score	z	Obs. m/z	Calc. m/z	Obs. MH	Calc. MH	ppm err.	Off- By-X	Cleavage	Delta Score	Delta Mod. Score	Protein Name	Fragment Type	Comment	Scan #	Scan Time	Glycans Pos.		Obs.M	Calc.M
						18335	R	133	R.C[+162.05282]KGTDVQAWIR.G		C1(Hex / 162.0528)	1.42e-07	388.6	2	719.85	719.853	1438.69	1438.7	-4.10461		Specific	388.613	388.613	>sp|P00698|LYSC_CHICK Lysozyme C OS=Gallus gallus GN=LYZ PE=1 SV=1	high-energy collision-induced dissociation	00527771buch_ab4liz2_s.6473.6473.2	controllerType=0 controllerNumber=1 scan=6473	34.2889		1437.69	1437.69
																			CID fragmentation of peptide with N-terminal, S-glucosylated Cysteine residue _ the evidence on the gas phase glycosyl transfer onto C-terminal Arg followed by Amadori product formation and its fragmentation yielding imidazole structures
																								Glycosyl transfer and glucopyranose cross ring cut (0.2A)								Postulated imidazole formation						Amadori product's fructopyranosyl ring fragmentation										Amadori product's dehydration pathway
																					ppm					ppm					ppm					ppm					ppm					ppm
							Fragment mass tolerance 20 ppm				2e-05				MODEL D	PID 18335		y+	y+		± 20 ppm		y+	y+		± 20 ppm	(0.2 A)	y+	y+		± 20 ppm	(0.2 A)	y+	y+		± 20 ppm		y+	y+		± 20 ppm		y+	y+		± 20 ppm		y+	y+
															score 388.6	AA		calc.	obs.	int.	2e-05		162 gain	162 gain	int.	2e-05	120	42 gain	42 gain	int.	2e-05	42-18	24 gain	24 gain	int.	2e-05	162-90	72 gain	72 gain	int.	2e-05	162-150	12 gain	12 gain	int.	2e-05		144 gain	144 gain
												error			scan time:	C	11						calc.	obs.			tetrose loss	calc.	obs.				calc.	obs.			triose loss	calc.	obs.			pentose loss	calc.	obs.				calc.	obs.
												tolerance			34.2889	K	10	1173.64	1173.64	5434	-2.41131e-07	162.053	1335.69	not obs.			42.0106	1215.65	not obs.			24	1197.64	not obs.			72.0211	1245.66	not obs.			12	1185.64	not obs.			144.042	1317.68	NA
												± 20 ppm			z+2	G	9	1045.54	1045.54	299000	-9.7557e-07	162.053	1207.6	not obs.			42.0106	1087.55	not obs.			24	1069.54	not obs.			72.0211	1117.56	not obs.			12	1057.54	not obs.			144.042	1189.58	not obs.
									calc.	obs.	int.	2e-05				T	8	988.521	988.52	60020	-1.27058e-06	162.053	1150.57	not obs.			42.0106	1030.53	not obs.			24	1012.52	not obs.			72.0211	1060.54	not obs.			12	1000.52	not obs.			144.042	1132.56	not obs.
						204 NL	from MH		1234.62	not obs.						D	7	887.473	887.473	81510	-7.63967e-07	162.053	1049.53	not obs.			42.0106	929.484	not obs.			24	911.473	not obs.			72.0211	959.495	not obs.			12	899.473	899.478	1564	4.80503e-06	144.042	1031.52	not obs.
						204 NL/z	from precursor ion		617.816	not obs.						V	6	772.446	772.446	153400	-1.08098e-06	162.053	934.499	not obs.			42.0106	814.457	not obs.			24	796.446	not obs.			72.0211	844.468	not obs.			12	784.446	not obs.			144.042	916.489	not obs.
						180 NL	from MH		1258.64	not obs.						Q	5	673.378	673.377	76680	-9.22216e-07	162.053	835.431	not obs.			42.0106	715.389	not obs.			24	697.378	not obs.			72.0211	745.399	not obs.			12	685.378	not obs.			144.042	817.42	not obs.
						180 NL/z	from precursor ion		629.822	629.819	2686	-4.25634e-06				A	4	545.319	545.319	55710	-1.3625e-06	162.053	707.372	not obs.			42.0106	587.33	not obs.			24	569.319	not obs.			72.0211	617.341	not obs.			12	557.319	not obs.			144.042	689.362	not obs.
						162 NL	from MH		1276.65	1276.65	39860	4.18698e-07				W	3	474.282	474.281	33130	-1.95875e-06	162.053	636.335	not obs.			42.0106	516.293	not obs.			24	498.282	not obs.			72.0211	546.303	546.321	14800	3.24838e-05	12	486.282	not obs.			144.042	618.325	not obs.
						162 NL/z	from precursor ion		638.827	638.827	4867	4.58105e-08				I	2	288.203	288.202	19500	-1.7904e-06	162.053	450.256	not obs.			42.0106	330.214	not obs.			24	312.203	not obs.			72.0211	360.224	not obs.			12	300.203	not obs.			144.042	432.245	not obs.
						150 NL/z	from precursor ion		644.827	not obs.						R	1	175.119	175.119	76430	-8.67981e-07	162.053	337.172	not obs.			42.0106	217.13	217.08	4015	-0.000229596	24	199.119	199.106	1297	-6.65532e-05	72.0211	247.14	not obs.			12	187.119	187.107		-6.12017e-05	144.042	319.161	not obs.
						120 NL/z	from precursor ion		658.832	not obs.										860814																									1564
						90 NL/z	from precursor ion		674.838	not obs.																																			0.00181688
															MODEL D	PID 18335		b+	b+		± 20 ppm	tetrose loss	120 loss b+	120 loss b+		± 20 ppm	triose loss	90 loss b+	90 loss b+		± 20 ppm	150	150 loss b+	150 loss b+		± 20 ppm	H20 loss	18 loss b+	18 loss b+		± 20 ppm	2 H20 loss	36 loss b+	36 loss b+		± 20 ppm	3 H20 loss	54 loss b+	54 loss b+
															score 388.6	AA		calc.	obs. b+		2e-05	(0.2 A)	calc.	obs.		2e-05	90 loss	calc.	obs.		2e-05	pentose loss	calc.	obs.		2e-05		cal.	obs.		2e-05		cal.	obs.	int	2e-05		cal.	obs.
															scan time:	C	1	266.069			-1	120.042	146.027	not obs.			90.0317	176.038	not obs.			150.053	116.016	not obs.			18.0106	248.059	not obs.			36.0211	230.048	not obs.			54.0317	212.038	not obs.
															34.2889	K	2	394.164	394.167	1661	6.48461e-06	120.042	274.122	not obs.			90.0317	304.133	not obs.			150.053	244.111	not obs.			18.0106	376.154	not obs.			36.0211	358.143	358.144	3729	3.59074e-06	54.0317	340.133	340.132
															z+2	G	3	451.186			-1	120.042	331.143	not obs.			90.0317	361.154	not obs.			150.053	301.133	not obs.			18.0106	433.175	not obs.			36.0211	415.165	415.167	2006	6.0747e-06	54.0317	397.154	not obs.
																T	4	552.233			-1	120.042	432.191	not obs.			90.0317	462.202	not obs.			150.053	402.181	not obs.			18.0106	534.223	not obs.			36.0211	516.212	not obs.			54.0317	498.202	not obs.
																D	5	667.26			-1	120.042	547.218	not obs.			90.0317	577.229	not obs.			150.053	517.208	not obs.			18.0106	649.25	not obs.			36.0211	631.239	not obs.			54.0317	613.229	not obs.
																V	6	766.329			-1	120.042	646.286	not obs.			90.0317	676.297	not obs.			150.053	616.276	not obs.			18.0106	748.318	not obs.			36.0211	730.308	not obs.			54.0317	712.297	not obs.
																Q	7	894.387			-1	120.042	774.345	not obs.			90.0317	804.356	not obs.			150.053	744.334	not obs.			18.0106	876.377	not obs.			36.0211	858.366	not obs.			54.0317	840.356	not obs.
																A	8	965.424			-1	120.042	845.382	not obs.			90.0317	875.393	not obs.			150.053	815.372	not obs.			18.0106	947.414	not obs.			36.0211	929.403	not obs.			54.0317	911.393	not obs.
																W	9	1151.5			-1	120.042	1031.46	not obs.			90.0317	1061.47	not obs.			150.053	1001.45	not obs.			18.0106	1133.49	not obs.			36.0211	1115.48	not obs.			54.0317	1097.47	not obs.
																I	10	1264.59			-1	120.042	1144.55	not obs.			90.0317	1174.56	not obs.			150.053	1114.53	not obs.			18.0106	1246.58	not obs.			36.0211	1228.57	not obs.			54.0317	1210.56	not obs.
																R	11			1661																									5735
																				1																									3.45274
																		di-hexosyl			#VALUE!	glucopyranose cross ring cut (0.2A)				#DIV/0!	Amadori				#DIV/0!	Amadori				#DIV/0!	Amadori product's fructopyranosyl ring dehydratation
															MODEL D	PID 18335	hexosyl	b+162	b+162		± 20 ppm	tetrose loss	120 loss b+	120 loss b+		± 20 ppm	triose loss	90 loss b+	90 loss b+		± 20 ppm	150	150 loss b+	150 loss b+		± 20 ppm	H20 loss	18 loss b+	18 loss b+		± 20 ppm	2 H20 loss	36 loss b+	36 loss b+		± 20 ppm	3 H20 loss	54 loss b+	54 loss b+
													90.0317		score 388.6	AA	transfer	calc.	obs.		2e-05	(0.2 A)	calc.			2e-05	90 loss	calc.	obs.		2e-05	pentose loss	calc.	obs.		2e-05		cal.	obs.		2e-05		cal.	obs.	int	2e-05		cal.	obs.
													150.053		scan time:	C	162.053	428.122	not obs.			120.042	146.027	not obs.			90.0317	176.038	not obs.			150.053	278.069	not obs.			18.0106	410.112	not obs.			36.0211	392.101	not obs.			54.0317	374.09	not obs.
															34.2889	K	162.053	556.217	not obs.			120.042	274.122	not obs.			90.0317	304.133	not obs.			150.053	406.164	not obs.			18.0106	538.206	not obs.			36.0211	520.196	not obs.			54.0317	502.185	not obs.
																G	162.053	613.239	not obs.			120.042	331.143	not obs.			90.0317	361.154	not obs.			150.053	463.186	not obs.			18.0106	595.228	not obs.			36.0211	577.217	not obs.			54.0317	559.207	not obs.
															z+2	T	162.053	714.286	714.314	2536	3.93316e-05	120.042	432.191	not obs.			90.0317	462.202	not obs.			150.053	564.233	not obs.			18.0106	696.276	not obs.			36.0211	678.265	not obs.			54.0317	660.255	not obs.
																D	162.053	829.313	not obs.			120.042	547.218	not obs.			90.0317	577.229	not obs.			150.053	679.26	not obs.			18.0106	811.303	not obs.			36.0211	793.292	not obs.			54.0317	775.281	not obs.
																V	162.053	928.382	not obs.			120.042	646.286	not obs.			90.0317	676.297	not obs.			150.053	778.329	not obs.			18.0106	910.371	not obs.			36.0211	892.36	not obs.			54.0317	874.35	not obs.
																Q	162.053	1056.44	1056.54	2174	9.23469e-05	120.042	774.345	not obs.			90.0317	804.356	not obs.			150.053	906.387	not obs.			18.0106	1038.43	not obs.			36.0211	1020.42	not obs.			54.0317	1002.41	not obs.
																A	162.053	1127.48	not obs.			120.042	845.382	not obs.			90.0317	875.393	not obs.			150.053	977.424	not obs.			18.0106	1109.47	not obs.			36.0211	1091.46	not obs.			54.0317	1073.45	not obs.
																W	162.053	1313.56	NA			120.042	1031.46	not obs.			90.0317	1061.47	not obs.			150.053	1163.5	not obs.			18.0106	1295.55	not obs.			36.0211	1277.54	not obs.			54.0317	1259.52	not obs.
																I	162.053	1426.64	NA			120.042	1144.55	not obs.			90.0317	1174.56	not obs.			150.053	1276.59	not obs.			18.0106	1408.63	not obs.			36.0211	1390.62	not obs.			54.0317	1372.61	not obs.
																R
						PID	Prot. Rank	Pos.	Sequence	Glycans	Mods (variable)	PEP	Score	z	Obs. m/z	Calc. m/z	Obs. MH	Calc. MH	ppm err.	Off- By-X	Cleavage	Delta Score	Delta Mod. Score	Protein Name	Fragment Type	Comment	Scan #	Scan Time	Glycans Pos.	Obs.M	Calc.M
						18338	R	133	R.C[+162.05282]KGTDVQAWIR.G		C1(Hex / 162.0528)	1.97e-06	366.6	3	480.236	480.238	1438.69	1438.7	-4.62158		Specific	366.58	366.58	>sp|P00698|LYSC_CHICK Lysozyme C OS=Gallus gallus GN=LYZ PE=1 SV=1	high-energy collision-induced dissociation	00527771buch_ab4liz2_s.6484.6484.3	controllerType=0 controllerNumber=1 scan=6484	34.323		1437.69	1437.69
															480.236	not obs.	not obs.
												± 20 ppm
									calc.	obs.	int.	2e-05
						204 NL	from MH		1234.62	not obs.
						204 NL/z	from precursor ion		412.213	412.185	2891	-6.70329e-05
						180 NL	from MH		1258.64	not obs.
						180 NL/z	from precursor ion		420.217	not obs.														Glycosyl transfer and glucopyranose cross ring cut (0.2A)								Postulated imidazole formation						Amadori product's fructopyranosyl ring fragmentation										Amadori product's dehydration pathway
						162 NL	from MH		1276.65	not obs.
						162 NL/z	from precursor ion		426.22	not obs.					MODEL D	PID 18338		y+	y+		± 20 ppm		y+	y+		± 20 ppm	(0.2 A)	y+	y+		± 20 ppm	(0.2 A)	y+	y+		± 20 ppm		y+	y+		± 20 ppm		y+	y+		± 20 ppm		y+	y+
						150 NL/z	from precursor ion		430.22	430.195	4660	-5.8802e-05			score 366.6	AA		calc.	obs.	int.	2e-05		162 gain	162 gain	int.	2e-05	120	42 gain	42 gain	int.	2e-05	42-18	24 gain	24 gain	int.	2e-05	162-90	72 gain	72 gain	int.	2e-05	162-150	12 gain	12 gain	int.	2e-05		144 gain	144 gain
						120 NL/z	from precursor ion		440.224	440.235	3973	2.56252e-05			scan time:	C	11						calc.	obs.			tetrose loss	calc.	obs.				calc.	obs.			triose loss	calc.	obs.			pentose loss	calc.	obs.				calc.	obs.
						90 NL/z	from precursor ion		450.227	not obs.					34.323	K	10	1173.64	not obs.			162.053	1335.69	not obs.			42.0106	1215.65	not obs.			24	1197.64	not obs.			72.0211	1245.66	not obs.			12	1185.64	not obs.			144.042	1317.68	not obs.
																G	9	1045.54	1045.54	278000	6.5038e-07	162.053	1207.6	not obs.			42.0106	1087.55	not obs.			24	1069.54	not obs.			72.0211	1117.56	not obs.			12	1057.54	not obs.			144.042	1189.58	not obs.
															z+3	T	8	988.521	988.522	52590	6.51478e-07	162.053	1150.57	not obs.			42.0106	1030.53	1030.53	4376	-2.67435e-06	24	1012.52	not obs.			72.0211	1060.54	not obs.			12	1000.52	not obs.			144.042	1132.56	not obs.
																D	7	887.473	887.473	78250	-5.38608e-07	162.053	1049.53	not obs.			42.0106	929.484	not obs.			24	911.473	not obs.			72.0211	959.495	not obs.			12	899.473	not obs.			144.042	1031.52	not obs.
																V	6	772.446	772.447	97020	9.9036e-07	162.053	934.499	not obs.			42.0106	814.457	not obs.			24	796.446	not obs.			72.0211	844.468	not obs.			12	784.446	not obs.			144.042	916.489	not obs.
																Q	5	673.378	673.378	165100	2.65824e-07	162.053	835.431	not obs.			42.0106	715.389	not obs.			24	697.378	not obs.			72.0211	745.399	not obs.			12	685.378	not obs.			144.042	817.42	not obs.
																A	4	545.319	545.319	265800	-8.12368e-07	162.053	707.372	not obs.			42.0106	587.33	not obs.			24	569.319	not obs.			72.0211	617.341	not obs.			12	557.319	not obs.			144.042	689.362	not obs.
																W	3	474.282	474.282	128500	-6.1145e-08	162.053	636.335	not obs.			42.0106	516.293	not obs.			24	498.282	not obs.			72.0211	546.303	not obs.			12	486.282	not obs.			144.042	618.325	not obs.
																I	2	288.203	288.203	59370	6.38439e-07	162.053	450.256	not obs.			42.0106	330.214	not obs.			24	312.203	not obs.			72.0211	360.224	not obs.			12	300.203	not obs.			144.042	432.245	not obs.
																R	1	175.119	175.119	106300	-2.96941e-07	162.053	337.172	337.172		0	42.0106	217.13	not obs.			24	199.119	not obs.			72.0211	247.14	not obs.			12	187.119	not obs.			144.042	319.161	not obs.
																				1230930			misassigned as y5++		1310					4376					0					0					0
																														0.00355504
																											21.0053										36.0106										72.0212
																PID 18338		y++	y++		± 20 ppm		y++	y++		± 20 ppm	(0.2 A)	y++	y++		± 20 ppm	(0.2 A)	y++	y+		± 20 ppm		y++	y++		± 20 ppm		y++	y++		± 20 ppm		y++	y++
																AA		calc.	obs.	int.	2e-05		162 gain	162 gain	int.	2e-05	120	42 gain	42 gain	int.	2e-05	42-18	24 gain	24 gain	int.	2e-05	162-90	72 gain	72 gain	int.	2e-05	162-150	12 gain	12 gain	int.	2e-05		144 gain	144 gain
																C	11						calc.	obs.			tetrose loss	calc.	obs.				calc.	obs.			triose loss	calc.	obs.			pentose loss	calc.	obs.				calc.	obs.
																K	10	587.322	587.324	41100	2.07722e-06	81.0264	668.349	not obs			21.0053	608.328	not obs.			12	599.322	not obs.			36.0106	623.333	not obs.			6	593.322	not obs.			72.0212	659.344	not obs.
																G	9	523.275	not obs.			81.0264	604.301	not obs			21.0053	544.28	not obs.			12	535.275	not obs.			36.0106	559.285	not obs.			6	529.275	not obs.			72.0212	595.296	not obs.
																T	8	494.764	not obs.			81.0264	575.791	not obs			21.0053	515.769	not obs.			12	506.764	not obs.			36.0106	530.775	not obs.			6	500.764	not obs.			72.0212	566.785	not obs.
																D	7	444.24	444.24	2926	1.64325e-07	81.0264	525.267	not obs			21.0053	465.246	not obs.			12	456.24	not obs.			36.0106	480.251	480.261		2.08443e-05	6	450.24	not obs.			72.0212	516.261	not obs.
																V	6	386.727	386.729	14450	4.51223e-06	81.0264	467.753	not obs			21.0053	407.732	not obs.			12	398.727	not obs.			36.0106	422.737	not obs.			6	392.727	not obs.			72.0212	458.748	not obs.
																Q	5	337.193	not obs.			81.0264	418.219	not obs			21.0053	358.198	not obs.			12	349.193	not obs.			36.0106	373.203	not obs.			6	343.193	not obs.			72.0212	409.214	not obs.
																A	4	273.163	273.161	3158	-7.54127e-06	81.0264	354.19	not obs			21.0053	294.169	not obs.			12	285.163	not obs.			36.0106	309.174	not obs.			6	279.163	not obs.			72.0212	345.185	345.178
																W	3	237.645	237.645	4755	-1.26239e-08	81.0264	318.671	not obs			21.0053	258.65	not obs.			12	249.645	not obs.			36.0106	273.655	not obs.			6	243.645	not obs.			72.0212	309.666	not obs.
																I	2	144.605	not obs.			81.0264	225.632	not obs			21.0053	165.61	not obs.			12	156.605	not obs.			36.0106	180.616	not obs.			6	150.605	not obs.			72.0212	216.626	not obs.
																R	1	88.0631	NA			81.0264	169.09	not obs			21.0053	109.068	not obs.			12	100.063	not obs.			36.0106	124.074	not obs.			6	94.0631	NA			72.0212	160.084	not obs.
											162.053									66389					0					0					0					0					0
											90.0317
											120.042
											150.053																										18.0106						36.0211				54.0317
																																Amadori					Amadori product's fructopyranosyl ring dehydratation
															MODEL D	PID 18338		b+	b+	int.	± 20 ppm	tetrose loss	120 loss b+	120 loss b+	int.	± 20 ppm	triose loss	90 loss b+	90 loss b+	int.	± 20 ppm	pentose loss	150 loss b+	150 loss b+	int.	± 20 ppm	H20 loss	18 loss b+	18 loss b+		± 20 ppm	2 H20 loss	36 loss b+	36 loss b+		± 20 ppm	3 H20 loss	54 loss b+	54 loss b+
															score 366.6	AA		calc.	obs. b+		2e-05		calc.	obs.		2e-05	from Amadori	calc.	obs.		2e-05	from Amadori	calc.	obs.		2e-05		cal.	obs.	int.	2e-05		cal.	obs.	int	2e-05		cal.	obs.
															scan time:	C	1	266.069	not obs.			120.042	146.027	not obs.			90.0317	176.038	not obs.			150.053	116.016	not obs.			18.0106	248.059	not obs.			36.0211	230.048	not obs.			54.0317	212.038	not obs.
															34.323	K	2	394.164	394.167	1661	6.48461e-06	120.042	274.122	not obs.			90.0317	304.133	not obs.			150.053	244.111	not obs.			18.0106	376.154	not obs.			36.0211	358.143	358.144	3729	3.59074e-06	54.0317	340.133	340.132
																G	3	451.186	not obs,			120.042	331.143	not obs.			90.0317	361.154	not obs.			150.053	301.133	not obs.			18.0106	433.175	not obs.			36.0211	415.165	not obs.			54.0317	397.154	not obs.
															z+3	T	4	552.233	not obs,			120.042	432.191	not obs.			90.0317	462.202	not obs.			150.053	402.181	not obs.			18.0106	534.223	not obs.			36.0211	516.212	not obs.			54.0317	498.202	not obs.
																D	5	667.26	667.261	29090	8.55738e-07	120.042	547.218	547.215	4652	-5.60837e-06	90.0317	577.229	not obs.			150.053	517.208	not obs.			18.0106	649.25	not obs.			36.0211	631.239	not obs.			54.0317	613.229	613.236
																V	6	766.329	766.325	7523	-4.49285e-06	120.042	646.286	not obs.			90.0317	676.297	not obs.			150.053	616.276	not obs.			18.0106	748.318	not obs.			36.0211	730.308	730.305	3504	-3.98873e-06	54.0317	712.297	not obs.
																Q	7	894.387	not obs,			120.042	774.345	not obs.			90.0317	804.356	not obs.			150.053	744.334	not obs.			18.0106	876.377	not obs.			36.0211	858.366	not obs.			54.0317	840.356	not obs.
																A	8	965.424	not obs,			120.042	845.382	not obs.			90.0317	875.393	not obs.			150.053	815.372	not obs.			18.0106	947.414	not obs.			36.0211	929.403	not obs.			54.0317	911.393	not obs.
																W	9	1151.5	not obs,			120.042	1031.46	not obs.			90.0317	1061.47	not obs.			150.053	1001.45	not obs.			18.0106	1133.49	not obs.			36.0211	1115.48	not obs.			54.0317	1097.47	not obs.
																I	10	1264.59	not obs,			120.042	1144.55	not obs.			90.0317	1174.56	not obs.			150.053	1114.53	not obs.			18.0106	1246.58	not obs.			36.0211	1228.57	not obs.			54.0317	1210.56	not obs.
																R	11			38274					4652																				7233
																				1					0.121545																				0.188979
																						120.042					90.0317					150.053
																						60.0211					45.0158					75.0264					9.00528					18.0106					27.0158
						b++		AA		y++					MODEL D	PID 18338		b++	b++	int.	± 20 ppm	tetrose loss	120 loss b++	120 loss b++	int.	± 20 ppm	triose loss	90 loss b++	90 loss b++	int.	± 20 ppm	pentose loss	150 loss b++	150 loss b++	int.	± 20 ppm	H20 loss	18 loss b++	18 loss b++		± 20 ppm	2 H20 loss	36 loss b++	36 loss b++		± 20 ppm	3 H20 loss	54 loss b++	54 loss b++
						133.538	1	C	11						score 366.6	AA		calc.	obs. b+		2e-05		calc.	obs.		2e-05	from Amadori	calc.	obs.		2e-05	from Amadori	calc.	obs.		2e-05		cal.	obs.	int.	2e-05		cal.	obs.	int	2e-05		cal.	obs.
						197.586	2	K	10	587.322					scan time:	C	1	133.538	not obs.			60.0211	73.5171	NA			45.0158	88.5224	NA			75.0264	58.5119	NA			9.00528	124.533	not obs.			18.0106	115.528	not obs.			27.0158	106.522	not obs.
						226.096	3	G	9	523.275					34.323	K	2	197.586	not obs.			60.0211	137.565	not obs.			45.0158	152.57	not obs.			75.0264	122.559	not obs.			9.00528	188.58	not obs.			18.0106	179.575	not obs.			27.0158	170.57	not obs.
						276.62	4	T	8	494.764						G	3	226.096	not obs.			60.0211	166.075	not obs.			45.0158	181.081	not obs.			75.0264	151.07	not obs.			9.00528	217.091	not obs.			18.0106	208.086	not obs.			27.0158	199.081	not obs.
						334.134	5	D	7	444.24					z+3	T	4	276.62	not obs.			60.0211	216.599	not obs.			45.0158	231.604	not obs.			75.0264	201.594	not obs.			9.00528	267.615	not obs.			18.0106	258.61	not obs.			27.0158	249.604	not obs.
						383.668	6	V	6	386.727						D	5	334.134	not obs.			60.0211	274.113	not obs.			45.0158	289.118	not obs.			75.0264	259.107	not obs.			9.00528	325.129	not obs.			18.0106	316.123	not obs.			27.0158	307.118	not obs.
						447.697	7	Q	5	337.193						V	6	383.668	not obs.			60.0211	323.647	not obs.			45.0158	338.652	not obs.			75.0264	308.642	not obs.			9.00528	374.663	not obs.			18.0106	365.657	not obs.			27.0158	356.652	not obs.
						483.216	8	A	4	273.163						Q	7	447.697	not obs.			60.0211	387.676	not obs.			45.0158	402.681	not obs.			75.0264	372.671	not obs.			9.00528	438.692	not obs.			18.0106	429.687	not obs.			27.0158	420.681	not obs.
						576.256	9	W	3	237.645						A	8	483.216	not obs.			60.0211	423.195	not obs.			45.0158	438.2	not obs.			75.0264	408.189	not obs.			9.00528	474.211	not obs.			18.0106	465.205	not obs.			27.0158	456.2	not obs.
						632.798	10	I	2	144.605						W	9	576.256	not obs.			60.0211	516.234	not obs.			45.0158	531.24	not obs.			75.0264	501.229	501.225	2237	-7.58136e-06	9.00528	567.25	567.244	3394	-1.13345e-05	18.0106	558.245	not obs.			27.0158	549.24	not obs.
							11	R	1	88.0631						I	10	632.798	not obs.			60.0211	572.776	not obs.			45.0158	587.782	not obs.			75.0264	557.771	not obs.			9.00528	623.792	not obs.			18.0106	614.787	not obs.			27.0158	605.782	not obs.
																R	11																							3394
																		di-hexosyl					glucopyranose cross ring cut (0.2A)				Amadori					Amadori					Amadori product's fructopyranosyl ring dehydratation
																PID 1603	hexosyl	b+162	b+162	int.	± 0.500 Da	tetrose loss	120 loss b+	120 loss b+	int.	± 0.500 Da	triose loss	90 loss b+	90 loss b+	int.	± 0.500 Da	150	150 loss b+	150 loss b+	int.	± 0.500 Da	H20 loss	18 loss b+	18 loss b+		± 0.500 Da	2 H20 loss	36 loss b+	36 loss b+		± 0.500 Da	3 H20 loss	54 loss b+	54 loss b+
																AA	transfer	calc.	obs.		err.	(0.2 A)	calc.	obs.		err.	90 loss	calc.	obs.		err.	pentose loss	calc.	obs.		err.		cal.	obs.	int.	err.		cal.	obs.	int	err.		cal.	obs.
																C	162.053	295.591	not obs.			120.042	13.496	NA			90.0317	43.5066	NA			150.053	-16.5145	NA			18.0106	115.528	not obs.			36.0211	97.5171	not obs.			54.0317	79.5066	212.118
																		162.05282/2					120.042					90.0317					150.053					18.0106
																			di-hexosyl			#VALUE!	glucopyranose cross ring cut (0.2A)				#DIV/0!	Amadori				#DIV/0!	Amadori				#DIV/0!	Amadori product's fructopyranosyl ring dehydratation					36.0211					54.0317
																MODEL D	PID 18338	hexosyl	[ b+162]++	b+162		± 20 ppm	tetrose loss	120 loss b+	120 loss b+		± 20 ppm	triose loss	90 loss b+	90 loss b+		± 20 ppm	150	150 loss b+	150 loss b+		± 20 ppm	H20 loss	18 loss b+	18 loss b+		± 20 ppm	2 H20 loss	36 loss b+	36 loss b+		± 20 ppm	3 H20 loss	54 loss b+
																score 388.6	AA	transfer	calc.	obs.		2e-05	(0.2 A)	calc.			2e-05	90 loss	calc.	obs.		2e-05	pentose loss	calc.	obs.		2e-05		cal.	obs.		2e-05		cal.	obs.	int	2e-05		cal.
																scan time:	C	81.0264	214.565			-1	60.0211	154.544	not ons		#VALUE!	45.0158	169.549	not obs.			75.0264	139.538	not obs.		#VALUE!	9.00528	205.559	not obs.			18.0106	196.554	not obs.			27.0158	187.549
																34.2889	K	81.0264	278.612			-1	60.0211	218.591			-1	45.0158	233.596				75.0264	203.586			-1	9.00528	269.607				18.0106	260.602				27.0158	251.596
																	G	81.0264	307.123			-1	60.0211	247.102			-1	45.0158	262.107				75.0264	232.096	232.112	69200	6.46714e-05	9.00528	298.118				18.0106	289.112				27.0158	280.107
																z+3	T	81.0264	357.647			-1	60.0211	297.626			-1	45.0158	312.631				75.0264	282.62			-1	9.00528	348.641				18.0106	339.636				27.0158	330.631
																	D	81.0264	415.16			-1	60.0211	355.139			-1	45.0158	370.144				75.0264	340.134			-1	9.00528	406.155				18.0106	397.15				27.0158	388.144
																	V	81.0264	464.694			-1	60.0211	404.673			-1	45.0158	419.679				75.0264	389.668			-1	9.00528	455.689				18.0106	446.684				27.0158	437.679
																	Q	81.0264	528.724			-1	60.0211	468.703			-1	45.0158	483.708				75.0264	453.697				9.00528	519.718				18.0106	510.713				27.0158	501.708
																	A	81.0264	564.242			-1	60.0211	504.221			-1	45.0158	519.226				75.0264	489.216				9.00528	555.237				18.0106	546.232				27.0158	537.226
																	W	81.0264	657.282			-1	60.0211	597.261			-1	45.0158	612.266				75.0264	582.256				9.00528	648.277				18.0106	639.271				27.0158	630.266
																	I	81.0264	713.824			-1	60.0211	653.803			-1	45.0158	668.808				75.0264	638.798				9.00528	704.819				18.0106	695.813				27.0158	686.808
																	R
																			di-hexosyl			#VALUE!	glucopyranose cross ring cut (0.2A)				#DIV/0!	Amadori				#DIV/0!	Amadori				#DIV/0!	Amadori product's fructopyranosyl ring dehydratation
																MODEL D	PID 18338	hexosyl	b+162	b+162		± 20 ppm	tetrose loss	120 loss b+	120 loss b+		± 20 ppm	triose loss	90 loss b+	90 loss b+		± 20 ppm	150	150 loss b+	150 loss b+		± 20 ppm	H20 loss	18 loss b+	18 loss b+		± 20 ppm	2 H20 loss	36 loss b+	36 loss b+		± 20 ppm	3 H20 loss	54 loss b+
																score 388.6	AA	transfer	calc.	obs.		2e-05	(0.2 A)	calc.			2e-05	90 loss	calc.	obs.		2e-05	pentose loss	calc.	obs.		2e-05		cal.	obs.		2e-05		cal.	obs.	int	2e-05		cal.
																scan time:	C	162.053	388.149				120.042	268.107	not obs.			90.0317	298.118	not obs.			150.053	238.096	238.146	1890	0.000207109	18.0106	370.139	not obs.			36.0211	352.128	not obs.			54.0317	334.118
																34.2889	K	162.053	438.673				120.042	318.631				90.0317	348.641				150.053	288.62	288.645	5596	8.68719e-05	18.0106	420.663				36.0211	402.652				54.0317	384.641
																	G	162.053	496.187				120.042	376.144				90.0317	406.155				150.053	346.134			-1	18.0106	478.176				36.0211	460.165				54.0317	442.155
																z+3	T	162.053	545.721				120.042	425.679				90.0317	455.689				150.053	395.668			-1	18.0106	527.71				36.0211	509.7				54.0317	491.689
																	D	162.053	609.75				120.042	489.708				90.0317	519.718				150.053	459.697			-1	18.0106	591.74				36.0211	573.729				54.0317	555.718
																	V	162.053	645.269				120.042	525.226				90.0317	555.237				150.053	495.216			-1	18.0106	627.258				36.0211	609.248				54.0317	591.237
																	Q	162.053	738.308				120.042	618.266				90.0317	648.277				150.053	588.256			-1	18.0106	720.298				36.0211	702.287				54.0317	684.277
																	A	162.053	794.85				120.042	674.808				90.0317	704.819				150.053	644.798			-1	18.0106	776.84				36.0211	758.829				54.0317	740.819
																	W	162.053	162.053				120.042	42.0106				90.0317	72.0211				150.053	12			-1	18.0106	144.042				36.0211	126.032				54.0317	108.021
																	I	162.053	162.053				120.042	42.0106				90.0317	72.0211				150.053	12			-1	18.0106	144.042				36.0211	126.032				54.0317	108.021
																	R
																													501.229	501.225
[truncated: 19 more columns]

## Sheet: CID_C+162ELAAAMK
PID	Prot. Rank	Pos.	Sequence	Glycans	Mods (variable)	PEP	Score	z	Obs. m/z	Calc. m/z	Obs. MH	Calc. MH	ppm err.	Off- By-X	Cleavage	Delta Score	Delta Mod. Score	Protein Name	Fragment Type	Comment	Scan #	Scan Time	Glycans Pos.	Obs.M	Calc.M
222	1	24	R.C[+162.05282]ELAAAMK.R		C1(Hex / 162.0528)	0.00102	147.1	2	499.727	499.73	998.448	998.453	-5.77078		Specific	147.123	147.123	>sp|P00698|LYSC_CHICK Lysozyme C OS=Gallus gallus GN=LYZ PE=1 SV=1	collision-induced dissociation	00527771buch_ab4liz2_s.3991.3991.2	controllerType=0 controllerNumber=1 scan=3991	25.8018		997.44	997.446
										https://doi.org/10.1002/cphc.201300057
																		INTERMOLECULAR GLYCOSYL TRANSFER
					CID fragmentation of peptide with N-terminal, S-glucosylated Cysteine residue _ the evidence on the glycosyl transfer onto C-terminal Lys followed by Amadori rearrangement in a gas phase
											Glycosyl transfer and glucopyranose cross ring cut (0.2A)										Amadori product fructopyranosyl ring fragmentation										Amadori product dehydration pathway
											hexosyl transfer											triose loss					pentose loss
		MODEL D	PID 222		y+	y+		± 0.500 Da		y+	y+		± 0.500 Da	(0.2 A)	y+	y+		± 0.500 Da		y+	y+		± 0.500 Da		y+	y+		± 0.500 Da		y+	y+		± 0.500 Da		y+	y+		± 0.500 Da		y+	y+		± 0.500 Da		y+	y+		± 0.500 Da	MODEL D
		score 186.1	AA		calc.	obs.	int.	err.		162 gain	162 gain	int.	err.	120	42 gain	42 gain	int.	err.	162-90	72 gain	72 gain	int.	err.	162-150	12 gain	12 gain	int.	err.	18 loss	144 gain	144 gain	int.	err.	36 loss	126 gain	126 gain	int.	err.	54 loss	108 gain	108 gain	int.	err.	CH2O	78 gain	78 gain	int.	err.	score 186.1
		scan time:	C	8						calc.	obs.			tetrose loss	calc.	obs.			triose loss	calc.	obs.			pentose loss	calc.	obs.				calc.	obs.				calc.	obs.				calc.	obs.			loss	calc.	obs.			scan time:
		25.8018	E	7	733.391	733.579	849.3	0.187613	162.053	895.444	895.764	37.6	0.319793	42.0106	775.402	not obs.			72.0211	805.412	not obs.			12	745.391	not obs.			144.042	877.434	877.695	368.6	0.261313	126.032	859.423	859.638	144.6	0.215213	108.021	841.412	841.882	70.54	0.469413	78.0106	811.402	not obs.			25.8018
		z +2	L	6	604.349	604.439	74560	0.090706	162.053	766.402	not obs.			42.0106	646.359	646.521	1328	0.161406	72.0211	676.37	676.514	210	0.143881	12	616.349	616.686	640.8	0.336806	144.042	748.391	not obs.			126.032	730.38	730.514	160.9	0.133906	108.021	712.37	712.161	191.8	-0.209194	78.0106	682.359	not obs.			z +2
			A	5	491.265	491.412	1437	0.14777	162.053	653.317	652.956	549.6	-0.36175	42.0106	533.275	not obs.			72.0211	563.286	not obs.			12	503.265	not obs.			144.042	635.307	not obs.			126.032	617.296	not obs.			108.021	599.286	599.754	267.5	0.46837	78.0106	569.275	569.734	744	0.45917
			A	4	420.228	420.078	15760	-0.149516	162.053	582.28	581.782	744.2	-0.498136	42.0106	462.238	not obs.			72.0211	492.249	492.43	528.8	0.180859	12	432.228	432.117	2482	-0.110816	144.042	564.27	564.588	385.2	0.317784	126.032	546.259	545.787	620.2	-0.472716	108.021	528.249	528.269	152.9	0.020084	78.0106	498.238	not obs.
			A	3	349.19	349.327	7195	0.136397	162.053	511.243	not obs.			42.0106	391.201	391.26	190.3	0.058997	72.0211	421.212	421.496	4975	0.284272	12	361.19	361.228	582.4	0.037497	144.042	493.233	493.42	155.9	0.186897	126.032	475.222	474.756	51.56	-0.466303	108.021	457.212	not obs.			78.0106	427.201	427.269	237	0.068197
			M	2	278.153	278.282	3788	0.129111	162.053	440.206	439.949	68840	-0.257609	42.0106	320.164	320.313	248.7	0.148711	72.0211	350.174	350.312	1000	0.137586	12	290.153	290.251	44.96	0.097311	144.042	422.196	422.453	1439	0.257011	126.032	404.185	404.33	94.66	0.145111	108.021	386.174	386.447	461.3	0.272811	78.0106	356.164	356.252	192.6	0.088411
			K	1	147.113	147.098	2307	-0.014404	162.053	309.166	309.168	44.8	0.001976	42.0106	189.123	189.115	190	-0.008204	72.0211	219.134	not obs.			12	159.113	not obs.			144.042	291.155	not obs.			126.032	273.145	not obs.			108.021	255.134	255.226	142.9	0.091896	78.0106	225.123	not obs.
							105896					70216.2					1957					6713.8					3750.16					2348.7					1071.92					1286.94					1173.6
							1					0.663066					0.0184803					0.0633998					0.0354135					0.0221792					0.0101224					0.0121528					0.0110825
												1
					hexose ring fragmentation
									glucopyranosyl ring cross cut (0.2 A)					Amadori					Amadori					fructopyranosyl ring dehydratation
					b+	b+	int.	± 0.500 Da	tetrose loss	120 loss b+	120 loss b+	int.	± 0.500 Da	triose loss	90 loss b+	90 loss b+	int.	± 0.500 Da	150	150 loss b+	150 loss b+	int.	± 0.500 Da	H20 loss	18 loss b+	18 loss b+		± 0.500 Da	2 H20 loss	36 loss b+	36 loss b+		± 0.500 Da	3 H20 loss	54 loss b+	54 loss b+		± 0.500 Da	3 H20 +CH2O loss	84 loss b+	84 loss b+		± 0.500 Da	3 H20 +CH2O loss	78 gain b+	78 gain b+		± 0.500 Da
			AA		calc.	obs. b+		err.	(0.2 A)	calc.	obs.		err.	90 loss	calc.	obs.		err.	pentose loss	calc.	obs.		err.		cal.	obs.	int.	err.		cal.	obs.	int	err.		cal.	obs.	int	err.		cal.	obs.	int	err.		cal.	obs.	int	err.
			C	1	266.069	266.277	283.7	0.208019	120.042	146.027	not obs.			90.0317	176.038	not obs.			150.053	116.016	NA			18.0106	248.059	not obs.			36.0211	230.048	230.208	479.5	0.160349	54.0317	212.038	212.165	109.2	0.127814	84.0422	61.9848	NA			78.0106	344.08	not obs.
	377.101		E	2	395.112	395.214	3084	0.102226	120.042	275.07	275.167	3821	0.097486	90.0317	305.08	305.288	155.4	0.208021	150.053	245.059	245.299	839.9	0.23985	18.0106	377.101	377.317	358.5	0.215191	36.0211	359.091	359.245	7655	0.154756	54.0317	341.08	341.398	1063	0.318121	84.0422	191.027	191.09	64.68	0.062806	78.0106	473.122	473.052	4041	-0.070674
	490.185		L	3	508.196	508.502	139.9	0.305762	120.042	388.154	388.016	1280	-0.137578	90.0317	418.164	not obs.			150.053	358.143	358.399	1369	0.256186	18.0106	490.185	not obs.			36.0211	472.175	472.331	2950	0.156592	54.0317	454.164	454.555	3862	0.390457	84.0422	304.111	304.397	685.2	0.285942	78.0106	586.207	585.927	540.8	-0.279138
	561.222		A	4	579.233	579.427	437.1	0.194348	120.042	459.191	458.973	2016	-0.218092	90.0317	489.201	not obs.			150.053	429.18	429.189	998.8	0.008872	18.0106	561.222	561.421	209.7	0.198713	36.0211	543.212	543.175	1225	-0.037322	54.0317	525.201	525.373	412.4	0.171643	84.0422	375.149	not obs.			78.0106	657.244	657.715	419.9	0.471448
	632.26		A	5	650.27	650.682	218.8	0.411634	120.042	530.228	530.112	499	-0.115406	90.0317	560.238	560.527	1047	0.288029	150.053	500.217	499.997	244.4	-0.220742	18.0106	632.26	632.475	674.6	0.215099	36.0211	614.249	614.141	1417	-0.107836	54.0317	596.238	not obs.			84.0422	446.186	not obs.			78.0106	728.281	not obs.
	703.297		A	6	721.307	721.698	362.4	0.39032	120.042	601.265	601.342	692.6	0.07668	90.0317	631.276	631.507	126	0.231415	150.053	571.254	not obs.			18.0106	703.297	703.745	702.2	0.448785	36.0211	685.286	685.477	592.2	0.19075	54.0317	667.276	667.354	445.7	0.077915	84.0422	517.223	517.26	78.23	0.0377	78.0106	799.318	not obs.
	834.337		M	7	852.348	852.637	665.8	0.289636	120.042	732.306	732.311	2138	0.005096	90.0317	762.316	not obs.			150.053	702.295	702.412	131.9	0.11676	18.0106	834.337	not obs.			36.0211	816.327	816.563	687.1	0.236766	54.0317	798.316	798.642	286.9	0.325631	84.0422	654.295	654.317	1285	0.022396	78.0106	930.358	not obs.
			K	8			5191.7					10446.6					1328.4					3584					1945					15005.8					6179.2					2113.11					5001.7
							1					2.01217					0.25587			hexosyl transfer	di-hexosyl	0.690333					0.374636					2.89034					1.19021					0.407017
					calc.	obs.	int.	± 0.500 Da				H2O	2 H2O	3 H2O					hexosyl	b+162	b+162	int.	± 0.500 Da																78.0106
		180 NL	from MH		818.39	818.543	76.32	0.153415	hexose loss			18.0106	36.0211	54.0317					transfer	calc.	obs.		err.																162.053
		180 NL	from precursor ion		409.699	410.003	8292	0.304719								733.391			162.053	428.122	427.984	498.7	-0.137701																84.0422		78.0106
		162 NL	from MH		836.4	836.567	42100	0.166835	hexosyl loss										162.053	557.165	557.368	1225	0.203406																30.0105
		162 NL	from precursor ion		418.704	418.941	299200	0.237229				162.053	150.053	120.042	90.0317				162.053	670.249	669.755	177.7	-0.493858															CH2O	30.0106
		150 NL	from precursor ion		424.704	425.159	715.8	0.455541	Amadori	pentose									162.053	741.286	not obs.																						same
		120 NL	from precursor ion		439.709	439.949	68840	0.239359	tetrose			144.042	126.032	108.021	78.0106	42.0106	24		162.053	812.323	not obs.
		90 NL	from precursor ion		454.714	454.555	3862	-0.159723	Amadori	triose									162.053	883.36	not obs.
																			162.053	1014.4	NA														108.021
				inter-						42 gain					72 gain					12 gain					144 gain					126 gain					108 gain						72 gain
				molecular	di-hexosyl				plus 42	glucopyranose cross ring cut (0.2A)				Amadori					Amadori					Amadori product's fructopyranosyl ring dehydratation															84.0423
		MODEL D	PID 222	hexosyl	b+162	b+162	int.	± 0.500 Da	tetrose loss	120 loss b+	120 loss b+	int.	± 0.500 Da	triose loss	90 loss b+	90 loss b+	int.	± 0.500 Da	150	150 loss b+	150 loss b+	int.	± 0.500 Da	H20 loss	18 loss b+	18 loss b+		± 0.500 Da	2 H20 loss	36 loss b+	36 loss b+		± 0.500 Da	3 H20 loss	54 loss b+	54 loss b+		± 0.500 Da		3 H2O+ CH2O	72 gain b+	54 loss b+		± 0.500 Da
		score 186.1	AA	transfer	calc.	obs.		err.	(0.2 A)	calc.	obs.		err.	90 loss	calc.	obs.		err.	pentose loss	calc.	obs.		err.		cal.	obs.	int.	err.		cal.	obs.	int	err.		cal.	obs.	int	err.		loss	cal.	obs.	int	err.
	1	scan time:	C	162.053	428.122	427.984	498.7	-0.137701	120.042	308.08	not obs.			90.0317	338.09	338.441	218.5	0.350294	150.053	278.069	not obs.			18.0106	410.112	410.003	8292	-0.108236	36.0211	392.101	392.079	466.8	-0.022171	54.0317	374.09	373.761	201.3	-0.329806		84.0423	344.08	not obs.
	2	25.8018	E	162.053	557.165	557.368	1225	0.203406	120.042	437.122	436.934	2158	-0.188434	90.0317	467.133	467.037	1663	-0.095799	150.053	407.112	406.982	394.9	-0.13007	18.0106	539.154	not obs.			36.0211	521.144	521.528	128.1	0.384436	54.0317	503.133	not obs.				84.0423	473.122	473.052	4041	-0.070674
	3	z +2	L	162.053	670.249	669.755	177.7	-0.493858	120.042	550.206	550.014	1890	-0.192298	90.0317	580.217	580.35	183.6	0.133237	150.053	520.196	520.244	130.5	0.047966	18.0106	652.238	not obs.			36.0211	634.228	633.858	457.1	-0.369228	54.0317	616.217	616.686	640.8	0.468437		84.0423	586.206	585.927	540.8	-0.279138
	4		A	162.053	741.286	not obs.			120.042	621.244	621.354	280.1	0.110588	90.0317	651.254	651.692	47.69	0.437523	150.053	591.233	590.91	1127	-0.323148	18.0106	723.275	not obs.			36.0211	705.265	not obs.			54.0317	687.254	687.508	98.86	0.253823		84.0423	657.244	657.715	419.9	0.471448
	5		A	162.053	812.323	not obs.			120.042	692.281	692.68	436.6	0.399274	90.0317	722.291	722.432	80.34	0.140309	150.053	662.27	662.508	98.86	0.237838	18.0106	794.312	not obs.			36.0211	776.302	not obs.			54.0317	758.291	not obs.				84.0423	728.281	not obs.
	6		A	162.053	883.36	not obs.			120.042	763.318	763.53	75.84	0.21246	90.0317	793.328	not obs.			150.053	733.307	not obs.			18.0106	865.35	not obs.			36.0211	847.339	847.64	300	0.30153	54.0317	829.328	not obs.				84.0423	799.318	not obs.
	7		M	162.053	1014.4	not obs.			120.042	894.358	not obs.			90.0317	924.369	not obs.			150.053	864.348	not obs.			18.0106	996.39	not obs.			36.0211	978.379	not obs.			54.0317	960.369	not obs.				84.0423	930.358	not obs.
	8		K
					total abundance		1901.4					4840.54					2193.13					1751.26					8292					1352					940.96						5001.7
							1					2.54578					1.15343					0.921037					4.361					0.711055					0.494877						2.63054
270.095																			150.053
240.085																			300.106	-138.053		300.106
180.063											b-108									b-138
			PID 222								108.042								Amadori
			AA		108.042			PID 222	tetrose &	150 loss b+	150 loss b+	int.	± 0.500 Da	2 trioses	150 loss b+	150 loss b+	int.	± 0.500 Da	300	150 loss b+	150 loss b+	int.	± 0.500 Da
			C					AA	pentose loss	calc.	obs.		err.	loss	calc.	obs.		err.	2 pentoses loss	calc.	obs.		err.
			E						270.095	158.027	not obs.			180.063	248.059	not obs.			300.106	128.016	NA
			L						270.095	287.07	not obs.			180.063	377.101	b2-10	2927		300.106	257.059	257.105	8626	0.045854
			A						270.095	400.154	400.405	745	0.251226	180.063	490.185	not obs.			300.106	370.143	370.378	3941	0.23499
			A						270.095	471.191	471.185	1992	-0.006288	180.063	561.222	b4-10	209.7		300.106	441.18	441	3867	-0.179724
			A						270.095	542.228	542.012	324.6	-0.215902	180.063	632.26	b5-10	674.6		300.106	512.217	512.497	687.7	0.279562
			M						270.095	613.265	612.896	257.8	-0.368616	180.063	703.297	b6-18	702.2		300.106	583.254	583.46	836	0.205048
			K						270.095	744.305	743.871	123.9	-0.4345	180.063	834.337				300.106	714.295	714.514	1366	0.218864
																doubtful
												3443.3										19323.7
												1.81093										10.1629
									hexosyl transfer										triose loss							pentose loss
		MODEL D	PID 223		y+	y+		± 0.500 Da		y+	y+		± 0.500 Da	(0.2 A)	y+	y+		± 0.500 Da		y+	y+		± 0.500 Da		y+	y+		± 0.500 Da		y+	y+		± 0.500 Da		y+	y+		± 0.500 Da		y+	y+		± 0.500 Da		y+	y+		± 0.500 Da
		score 185.8	AA		calc.	obs.	int.	err.		162 gain	162 gain	int.	err.	120	42 gain	42 gain	int.	err.		72 gain	72 gain	int.	err.		12 gain	12 gain	int.	err.		144 gain	144 gain	int.	err.		126 gain	126 gain	int.	err.		108 gain	108 gain	int.	err.		78 gain	78 gain	int.	err.
		scan time:	C	8						calc.	obs.			tetrose loss	calc.	obs.				calc.	obs.				calc.	obs.				calc.	obs.				calc.	obs.				calc.	obs.				calc.	obs.
		25.822	E	7	733.391	733.549	1328	0.158113	162.053	895.444	not obs.			42.0106	775.402				72.0211	805.412	not obs.			12	745.391	not obs.			144.042	877.434				126.032	859.423				108.021	841.412				78.0106	811.402
			L	6	604.349	604.404	86260	0.054906	162.053	766.402	not obs.			42.0106	646.359				72.0211	676.37	not obs.			12	616.349	not obs.			144.042					126.032					108.021					78.0106
			A	5	491.265	491.404	86260	0.13897	162.053	653.317	not obs.			42.0106	533.275				72.0211	563.286	563.771	325.1	0.485345	12	503.265	503.298	62.66	0.03327	144.042					126.032					108.021					78.0106
			A	4	420.228	420.022	21780	-0.205616	162.053	582.28	582.557	622.6	0.276664	42.0106	462.238				72.0211	492.249	492.275	680.2	0.026259	12	432.228	431.824	3326	-0.403616	144.042					126.032					108.021					78.0106
			A	3	349.19	349.284	7755	0.093097	162.053	511.243	not obs.			42.0106	391.201				72.0211	421.212	421.07	4637	-0.141228	12	361.19	361.111	143.6	-0.078903	144.042					126.032					108.021					78.0106
			M	2	278.153	278.179	5944	0.025611	162.053	440.206	439.903	72180	-0.302809	42.0106	320.164				72.0211	350.174	350.333	1374	0.158186	12	290.153	290.377	160.2	0.224011	144.042					126.032					108.021					78.0106
			K	1	147.113	147.186	2513	0.073296	162.053	309.166	not obs.			42.0106	189.123				72.0211	219.134	not obs.			12	159.113	159.143	90.48	0.029996	144.042					126.032					108.021					78.0106
							211840					72802.6										7016.3					3782.94
														Amadori					Amadori					fructopyranosyl ring dehydratation
					b+	b+	int.	± 0.500 Da	tetrose loss	120 loss b+	120 loss b+	int.	± 0.500 Da	triose loss	90 loss b+	90 loss b+	int.	± 0.500 Da	150	150 loss b+	150 loss b+	int.	± 0.500 Da	H20 loss	18 loss b+	18 loss b+		± 0.500 Da	2 H20 loss	36 loss b+	36 loss b+		± 0.500 Da	3 H20 loss	54 loss b+	54 loss b+		± 0.500 Da
			AA		calc.	obs. b+				calc.	obs.		err.	90 loss	calc.	obs.		err.	pentose loss	calc.	obs.		err.		cal.	obs.	int.	err.		cal.	obs.	int	err.		cal.	obs.	int	err.
			C	1	266.069	not obs.		err.	120.042	146.027	146.119	333.7	0.092479	90.0317	176.038	176.072	109	0.034814	150.053	116.016	NA
			E	2	395.112	395.185	2839	0.073426	120.042	275.07	275.199	3911	0.129186	90.0317	305.08	305.157	55.14	0.076821	150.053	245.059
			L	3	508.196	508.394	594.4	0.198062	120.042	388.154	388.193	2713	0.039522	90.0317	418.164	not obs.			150.053	358.143
			A	4	579.233	579.432	997.2	0.199148	120.042	459.191	458.738	2621	-0.453292	90.0317	489.201	not obs.			150.053	429.18
			A	5	650.27	650.393	228.1	0.123234	120.042	530.228	530.503	232.4	0.275494	90.0317	560.238	560.317	298.1	0.078729	150.053	500.217
			A	6	721.307	721.284	145.6	-0.02288	120.042	601.265	601.109	227	-0.15622	90.0317	631.276	631.096	426.4	-0.179185	150.053	571.254
			M	7	852.348	852.505	156	0.156936	120.042	732.306	732.563	70.5	0.257196	90.0317	762.316	not obs.			150.053	702.295
			K	8			4960.3					10108.6					888.64
																					di-hexosyl
																			hexosyl	b+162	b+162	int.	± 0.500 Da
					calc.	obs.	int.	± 0.500 Da											transfer	calc.	obs.		err.
		180 NL	from MH		818.39	818.597	333.4	0.206715	hexose loss										162.053	428.122	428.618	880.4	0.495499
		180 NL	from precursor ion		409.699	409.869	10150	0.170319											162.053	557.165	556.9	1020	-0.264594
		162 NL	from MH		836.4	836.534	53640	0.133935	hexosyl loss										162.053	670.249	669.957	294.3	-0.291458
		162 NL	from precursor ion		418.704	418.894	352400	0.190129											162.053	741.286	not obs.
		150 NL	from precursor ion		424.704	not obs.			Amadori	pentose loss from fructopyranose ring									162.053	812.323	not obs.
		120 NL	from precursor ion		439.709	439.903	72180	0.194159	tetrose	tetrose from glucopyranose ring									162.053	883.36	not obs.
		90 NL	from precursor ion		454.714	454.599	3125	-0.114923	Amadori	triose loss from fructopyranose ring									162.053	1014.4	NA
																triose loss
											hexosyl transfer										pentose loss
		MODEL D	PID 224		y+	y+		± 0.500 Da		y+	y+		± 0.500 Da	(0.2 A)	y+	y+		± 0.500 Da		y+	y+		± 0.500 Da		y+	y+		± 0.500 Da		y+	y+		± 0.500 Da		y+	y+		± 0.500 Da		y+	y+		± 0.500 Da		y+	y+		± 0.500 Da
		score 140.3	AA		calc.	obs.	int.	err.		162 gain	162 gain	int.	err.	120	42 gain	42 gain	int.	err.		72 gain	72 gain	int.	err.		12 gain	12 gain	int.	err.		144 gain	144 gain	int.	err.		126 gain	126 gain	int.	err.		108 gain	108 gain	int.	err.		78 gain	78 gain	int.	err.
		scan time:	C	8						calc.	obs.			tetrose loss	calc.	obs.				calc.	obs.				calc.	obs.				calc.	obs.				calc.	obs.				calc.	obs.				calc.	obs.
		25.9859	E	7	733.391	733.557	24230	0.166113	162.053	895.444	not obs.			42.0106	775.402				72.0211	805.412	not obs.			12	745.391	not obs.			144.042	877.434				126.032	859.423				108.021	841.412				78.0106	811.402
			L	6	604.349	604.426	972200	0.076806	162.053	766.402	not obs.			42.0106	646.359				72.0211	676.37	not obs.			12	616.349	616.472	1505	0.123206	144.042					126.032					108.021					78.0106
			A	5	491.265	491.396	12870	0.13117	162.053	653.317	not obs.			42.0106	533.275				72.0211	563.286	not obs.			12	503.265	not obs.			144.042					126.032					108.021					78.0106
			A	4	420.228	420.153	227000	-0.074116	162.053	582.28	not obs.			42.0106	462.238				72.0211	492.249	492.441	4233	0.192459	12	432.228	431.927	19940	-0.300316	144.042					126.032					108.021					78.0106
			A	3	349.19	349.293	99630	0.102197	162.053	511.243	511.532	749.7	0.289077	42.0106	391.201				72.0211	421.212	421.557	55250	0.345572	12	361.19	361.313	4713	0.122697	144.042					126.032					108.021					78.0106
			M	2	278.153	278.265	57310	0.112111	162.053	440.206	not obs.			42.0106	320.164				72.0211	350.174	350.365	20470	0.190186	12	290.153	not obs.			144.042					126.032					108.021					78.0106
			K	1	147.113	147.097	18630	-0.016004	162.053	309.166	not obs.			42.0106	189.123				72.0211	219.134	not obs.			12	159.113	159.128	1291	0.015096	144.042					126.032					108.021					78.0106
							1411870					749.7										79953					27449
														Amadori					Amadori					fructopyranosyl ring dehydratation
					b+	b+	int.	± 0.500 Da	tetrose	120 loss b+	120 loss b+	int.	± 0.500 Da	triose loss	90 loss b+	90 loss b+	int.	± 0.500 Da	150	150 loss b+	150 loss b+	int.	± 0.500 Da	H20 loss	18 loss b+	18 loss b+		± 0.500 Da	2 H20 loss	36 loss b+	36 loss b+		± 0.500 Da	3 H20 loss	54 loss b+	54 loss b+		± 0.500 Da
			AA		calc.	obs. b+		err.	loss	calc.	obs.		err.	from Amadori	calc.	obs.		err.	pentose loss	calc.	obs.		err.		cal.	obs.	int.	err.		cal.	obs.	int	err.		cal.	obs.	int	err.
			C	1	266.069	266.104	832.4	0.035019	120.042	146.027	not obs.			90.0317	176.038	175.887	1284	-0.150586	150.053	116.016	NA			18.0106					36.0211					54.0317
			E	2	395.112	395.219	38790	0.106626	120.042	275.07	275.149	59990	0.079886	90.0317	305.08	not obs.			150.053	245.059				18.0106					36.0211					54.0317
			L	3	508.196	508.293	1113	0.097162	120.042	388.154	388.344	7718	0.190722	90.0317	418.164	not obs.			150.053	358.143				18.0106					36.0211					54.0317
			A	4	579.233	579.379	1032	0.145448	120.042	459.191	458.84	41190	-0.350992	90.0317	489.201	not obs.			150.053	429.18				18.0106					36.0211					54.0317
			A	5	650.27	649.921	3484	-0.348966	120.042	530.228	530.375	1911	0.146594	90.0317	560.238	560.364	1227	0.125129	150.053	500.217				18.0106					36.0211					54.0317
			A	6	721.307	721.519	1285	0.21162	120.042	601.265	601.432	1364	0.16708	90.0317	631.276	not obs.			150.053	571.254				18.0106					36.0211					54.0317
			M	7	852.348	not obs.			120.042	732.306	732.549	3058	0.243696	90.0317	762.316	762.635	308.7	0.318631	150.053	702.295				18.0106					36.0211					54.0317
			K	8
					calc.	obs.	int.	± 0.500 Da												hexosyl transfer	di-hexosyl
		180 NL	from MH		818.39	not obs.			hexose loss										hexosyl	b+162	b+162	int.	± 0.500 Da
		180 NL	from precursor ion		409.699	410.008	115400	0.309619											transfer	calc.	obs.		err.
		162 NL	from MH		836.4	836.555	535000	0.154235	hexosyl loss										162.053	428.122	428.046	999.4	-0.076601
		162 NL	from precursor ion		418.704	418.928	4308000	0.223629											162.053	557.165	557.452	2301	0.287006
		150 NL	from precursor ion		424.704	424.978	6306	0.274341	Amadori	pentose									162.053	670.249	not obs.
		120 NL	from precursor ion		439.709	439.929	846300	0.219659	tetrose										162.053	741.286	not obs.
		90 NL	from precursor ion		454.714	454.392	17870	-0.322523	Amadori	triose									162.053	812.323	not obs.
																			162.053	883.36	883.834	1032	0.4743
																			162.053	1014.4	NA
[truncated: 31 more columns]

## Sheet: CID_RC +162 ELAAAMK
PID	Prot. Rank	Pos.	Sequence	Glycans	Mods (variable)	PEP	Score	z	Obs. m/z	Calc. m/z	Obs. MH	Calc. MH	ppm err.	Off- By-X	Cleavage	Delta Score	Delta Mod. Score	Protein Name	Fragment Type	Comment	Scan #	Scan Time	Glycans Pos.	Obs.M	Calc.M
754	C-term K	23	G.RC[+162.05282]ELAAAMK.R		C2(Hex / 162.0528)	0.0279	144.4	2	577.778	577.781	1154.55	1154.55	-5.59125		NRagged	7.53264	7.53264	>sp|P00698|LYSC_CHICK Lysozyme C OS=Gallus gallus GN=LYZ PE=1 SV=1	collision-induced dissociation	00527771buch_ab4liz2_s.3674.3674.2	controllerType=0 controllerNumber=1 scan=3674	24.6012		1153.54	1153.55	992.502	992.695	14850	0.193625	496.754	497.03	424800	0.275874	974.491	974.63	277.7	-0.139405	487.749	not obs.			1155.56	1.00728	162.053	180.063	1155.56	496.754	18.0106	36.0211
	G.RC[+162.05282]ELAAAMK.R
																				a+	b+		AA		x+	y+							calc.	obs.	int.	± 0.500 Da	loss
	b+		AA		y+						b++		AA		y++					129.113	157.108	1	R	9						162 NL	from precursor ion		496.754	497.03	424800	0.275874				1
	157.108	1	R	9							79.0578	1	R	9						394.175	422.17	2	C	8	1024.43	998.453				120 NL	from precursor ion		517.76	517.99	81770	0.230704	tetrose			0.192491
	422.17	2	C	8	998.453						211.589	2	C	8	499.73					523.218	551.213	3	E	7	759.371	733.391				179 NL	from precursor ion		488.241	488.434	28370	0.192661	from Arg	Amadori		0.0667844
	551.213	3	E	7	733.391						276.11	3	E	7	367.199					636.302	664.297	4	L	6	630.328	604.349				150 NL	from precursor ion		502.754	503.063	2781	0.308386	pentose	Amadori		0.00654661
	664.297	4	L	6	604.349						332.652	4	L	6	302.678					707.339	735.334	5	A	5	517.244	491.265				204 NL	from precursor ion		475.744	476.161	2576	0.417385	from Arg	Amadori		0.00606403
	735.334	5	A	5	491.265						368.171	5	A	5	246.136					778.376	806.371	6	A	4	446.207	420.228				162 gain	by precursor ion		658.807	658.456	1163	-0.351626	di-hexosyl			0.00273776
	806.371	6	A	4	420.228						403.689	6	A	4	210.617					849.413	877.408	7	A	3	375.17	349.19				162 NL	from MH		992.502	992.695	14850	0.193625	hexosyl			1
	877.408	7	A	3	349.19						439.208	7	A	3	175.099					980.454	1008.45	8	M	2	304.133	278.153				179 NL	from MH		975.475	975.765	1038	0.289999	from Arg	Amadori		0.069899
	1008.45	8	M	2	278.153						504.728	8	M	2	139.58							9	K	1	173.092	147.113				180 NL	from MH		974.491	974.63	277.7	0.139405	hexose			0.0187003
		9	K	1	147.113							9	K	1	74.06															180 NL	from precursor ion		not obs.
																						composition: C(40) H(71) N(13) O(11) S(2)								90 NL	from precursor ion		not obs.				triose	Amadori
			composition: C(40) H(71) N(13) O(11) S(2)									composition: C(40) H(71) N(13) O(11) S(2)										neutral mass: 1153.547127
			neutral mass: 1153.547127									neutral mass: 1153.547127										+ 1 charge: 1154.554403
			+ 1 charge: 1154.554403									+ 1 charge: 1154.554403										+ 2 charge: 577.780840
			+ 2 charge: 577.780840									+ 2 charge: 577.780840										+ 3 charge: 385.522985
			+ 3 charge: 385.522985									+ 3 charge: 385.522985										+ 4 charge: 289.394058
			+ 4 charge: 289.394058									+ 4 charge: 289.394058										+ 5 charge: 231.716702
			+ 5 charge: 231.716702									+ 5 charge: 231.716702										+ 6 charge: 193.265131
			+ 6 charge: 193.265131									+ 6 charge: 193.265131										+ 7 charge: 165.799723
			+ 7 charge: 165.799723									+ 7 charge: 165.799723										+ 8 charge: 145.200667
			+ 8 charge: 145.200667									+ 8 charge: 145.200667										+ 9 charge: 129.179179
			+ 9 charge: 129.179179									+ 9 charge: 129.179179										+10 charge: 116.361989
			+10 charge: 116.361989									+10 charge: 116.361989
																													488.434
																													975.765
																1206
											Glycosyl transfer and glucopyranose cross ring cut (0.2A)					5315					Amadori product fructopyranosyl ring fragmentation									26000	Amadori product dehydration pathway
											hexosyl transfer											triose loss					pentose loss
		MODEL D	PID 754		y+	y+		± 0.500 Da		y+	y+		± 0.500 Da	(0.2 A)	y+	y+		± 0.500 Da		y+	y+		± 0.500 Da		y+	y+		± 0.500 Da		y+	y+		± 0.500 Da		y+	y+		± 0.500 Da		y+	y+		± 0.500 Da		y+	y+		± 0.500 Da	MODEL D
		score 144.4	AA		calc.	obs.	int.	err.		162 gain	162 gain	int.	err.	120	42 gain	42 gain	int.	err.	162-90	72 gain	72 gain	int.	err.	162-150	12 gain	12 gain	int.	err.	18 loss	144 gain	144 gain	int.	err.	36 loss	126 gain	126 gain	int.	err.	54 loss	108 gain	108 gain	int.	err.	CH2O	78 gain	78 gain	int.	err.	score 144.4
		scan time:	R	9						calc.	obs.			tetrose loss	calc.	obs.			triose loss	calc.	obs.			pentose loss	calc.	obs.				calc.	obs.				calc.	obs.				calc.	obs.			loss	calc.	obs.			scan time:
		24.6012	C	8	998.453	998.681	1047	0.227408	162.053	1160.51	not obs.			42.0106	1040.46	1040.66	246.9	0.197408	72.0211	1070.47	not obs.			12	1010.45	1010.62	6358	0.169108	144.042	1142.5	not obs.			126.032	1124.48	not obs.		#VALUE!	108.021	1106.47	not obs.			78.0106	1076.46	not obs.			24.6012
		z +2	E	7	733.391	733.585	596.5	0.193413	162.053	895.444	not obs.			42.0106	775.402	774.989	816.7	-0.413387	72.0211	805.412	805.635	10170	0.222688	12	745.391	745.437	296.3	0.045713	144.042	877.434	877.582		0.148113	126.032	859.423	not obs.			108.021	841.412	841.212	644.8	-0.200187	78.0106	811.402	not obs.			z +2
			L	6	604.349	604.535	2357	0.186806	162.053	766.402	not obs.			42.0106	646.359	646.452		0.092506	72.0211	676.37	676.344	1530	-0.025419	12	616.349	616.251	3096	-0.097894	144.042	748.391	748.548	665.2	0.157006	126.032	730.38	730.604	492.1	0.223106	108.021	712.37	711.978	3695	-0.391694	78.0106	682.359	not obs.
			A	5	491.265	491.328	3349	0.06367	162.053	653.317	653.422	268.9	0.10425	42.0106	533.275	533.248		-0.02693	72.0211	563.286	not obs.			12	503.265	503.063	2781	-0.20183	144.042	635.307	635.074	7781	-0.233299	126.032	617.296	617.234	2174	-0.06283	108.021	599.286	not obs.			78.0106	569.275	not obs.
			A	4	420.228	420.327	3624	0.099984	162.053	582.28	581.806	84.09	-0.474536	42.0106	462.238	462.455	49160	0.217184	72.0211	492.249	492.553	2930	0.303859	12	432.228	432.301	1074	0.073484	144.042	564.27	not obs.			126.032	546.259	546.62	3901	0.360684	108.021	528.249	528.702	2825	0.453784	78.0106	498.238	497.888	47800	-0.349816
			A	3	349.19	349.358	7388	0.167697	162.053	511.243	510.856	7063	-0.387323	42.0106	391.201	391.384	4365	0.183197	72.0211	421.212	421.274	1184	0.062852	12	361.19	361.103	197.1	-0.087003	144.042	493.233	not obs.			126.032	475.222	not obs.			108.021	457.212	not obs.			78.0106	427.201	427.144	1138	-0.057403
			M	2	278.153	278.277	6823	0.123711	162.053	440.206	440.538	2358	0.331591	42.0106	320.164	not obs.			72.0211	350.174	350.393	2852	0.218786	12	290.153	290.356	4595	0.202511	144.042	422.196	not obs.			126.032	404.185	403.971	3078	-0.213889	108.021	386.174	386.355	48.44	0.180211	78.0106	356.164	not obs.
			K	1	147.113	147.184	2011	0.071596	162.053	309.166	309.496	430.6	0.330476	42.0106	189.123	189.243	231.9	0.119096	72.0211	219.134	not obs.			12	159.113	159.185	146.2	0.072296	144.042	291.155	291.301	796	0.145996	126.032	273.145	273.304	363.9	0.159096	108.021	255.134	255.343	232.1	0.209396	78.0106	225.123	225.371	1783	0.247196
	27195.5						27195.5					10204.6					54820.5					8496					11889.3					9242.2					10009					7445.34					50721
			162.053				1					0.375231				b3-18	2.01579					0.312405					0.437179				b7	0.339843					0.368039					0.273771					1.86505
			120.042									1				b4-18	5.37214					0.832567					1.16509					0.90569					0.980833					0.729607					4.97041
			18.0106		24												1.98
			138.053

					hexose ring fragmentation																														424800
									glucopyranosyl ring cross cut (0.2 A)					Amadori					Amadori					fructopyranosyl ring dehydratation
			PID 754		b+	b+	int.	± 0.500 Da	tetrose loss	120 loss b+	120 loss b+	int.	± 0.500 Da	triose loss	90 loss b+	90 loss b+	int.	± 0.500 Da	150	150 loss b+	150 loss b+	int.	± 0.500 Da	H20 loss	18 loss b+	18 loss b+		± 0.500 Da	2 H20 loss	36 loss b+	36 loss b+		± 0.500 Da	3 H20 loss	54 loss b+	54 loss b+		± 0.500 Da	3 H20 +CH2O loss	84 loss b+	84 loss b+		± 0.500 Da	3H2O +COH2 loss	78 gain b+	78 gain b+		± 0.500 Da
			AA		calc.	obs. b+		err.	(0.2 A)	calc.	obs.		err.	90 loss	calc.	obs.		err.	pentose loss	calc.	obs.		err.		cal.	obs.	int.	err.		cal.	obs.	int	err.		cal.	obs.	int	err.		cal.	obs.	int	err.		cal.	obs.	int	err.
			R	1	157.108	157.235	178	0.126612	120.042	NA				90.0317	NA				150.053	NA				18.0106	139.098	assigned by	Byonic		36.0211	121.087	NA			54.0317	103.077	NA			84.0422	73.0662	NA			78.0106	235.119				R
			C	2	422.17	422.406	411.3	0.236108	120.042	302.128	not obs.			90.0317	332.139	332.159	3236	0.020403	150.053	272.118	272.337	1035	0.219932	18.0106	404.16	403.971	3078	-0.188727	36.0211	386.149	386.355	48.44	0.205338	54.0317	368.139	368.352	368.5	0.212903	84.0422	338.128	338.469	743.4	0.340928	78.0106	500.181				C
	533.202		E	3	551.213	551.075	6386	-0.138185	120.042	431.171	431.292	279.4	0.121375	90.0317	461.181	461.399	13450	0.21771	150.053	401.16	not obs.			18.0106	533.202	533.248	5315	0.04588	36.0211	515.192	515.16	1546	-0.032155	54.0317	497.181	497.03		-0.15089	84.0422	467.171	467.589	6848	0.418635	78.0106	629.224			-629.224	E
	646.286		L	4	664.297	664.441	2279	0.144151	120.042	544.255	544.561	5234	0.305711	90.0317	574.265	not obs.			150.053	514.244	514.016	2538	-0.228525	18.0106	646.286	646.452	1206	0.165316	36.0211	628.276	628.112	773.9	-0.164219	54.0317	610.265	not obs.			84.0422	580.255	not obs.			78.0106	742.308			-742.308	L
	717.324		A	5	735.334	735.53	5853	0.195737	120.042	615.292	615.207	1904	-0.084503	90.0317	645.302	645.464	926.7	0.161632	150.053	585.281	585.323	139.7	0.041761	18.0106	717.324	717.579	1368	0.255102	36.0211	699.313	not obs.			54.0317	681.302	681.714	55.69	0.411232	84.0422	651.292	651.371	298.8	0.079357	78.0106	813.345			-813.345	A
	788.361		A	6	806.371	806.574	19040	0.202623	120.042	686.329	686.447	218.6	0.118383	90.0317	716.34	716.63	642.9	0.290818	150.053	656.318	656.506	601.9	0.188047	18.0106	788.361	788.567	5491	0.206788	36.0211	770.35	770.382	10250	0.032153	54.0317	752.34	752.766	2061	0.426218	84.0422	722.329	721.855	1176	-0.473957	78.0106	884.382				A
	859.398		A	7	877.408	877.582	26000	0.173309	120.042	757.366	757.676	67.35	0.310069	90.0317	787.377	787.766	12870	0.389204	150.053	727.356	not obs.			18.0106	859.398	not obs.			36.0211	841.387	841.212	644.8	-0.175061	54.0317	823.377	not obs.			84.0422	793.366	793.724	81.95	0.358029	78.0106	955.419				A
	990.438		M	8	1008.45	1008.63	20500	0.180125	120.042	888.407	not obs.			90.0317	918.417	918.609	337.2	0.19142	150.053	858.396	not obs.			18.0106	990.438	990.607	626.7	0.16859	36.0211	972.428	not obs.			54.0317	954.417	954.635	286.2	0.21802	84.0422	924.407	924.762	1440	0.355145	78.0106	1086.46				M
			K	9			80647.3					7703.35					28226.8					3279.6					14006.7					13263.1					2771.39					9844.75					0		K
							1					0.095519					0.350003					0.040666					0.173678					0.164459			162 NL		0.0343643					0.122072
			calc.	obs.	int.	± 0.500 Da	loss																																	300.106	2Glc added
180 NL	from MH		974.491	974.63	277.7	0.139405	hexose												add 2Glc	hexosyl transfer	di-hexosyl				2 pentoses										2 pentoses					120.042	hexosyl transfer	di-hexosyl					hexosyl transfer	di-hexosyl
180 NL	from precursor ion		not obs.									H2O	2 H2O	3 H2O				PID 754	hexosyl	b+324	b+324	int.	± 0.500 Da	lo	loss					loss					& hexosyl				PID 754		b+162	b+162	int.	± 0.500 Da		hexosyl	b+162	b+162	int.
179 NL	from MH		975.475	975.765	1038	0.289999	from Arg	Amadori				18.0106	36.0211	54.0317				AA	transfer	calc.	obs.		err.		calc.	obs.	int.	err.		calc.	obs.	int.	err.		loss	obs.	int.	err.	AA	loss	calc.	obs.		err.		loss	calc.	obs.
179 NL	from precursor ion		488.241	488.434	28370	0.192661	from Arg	Amadori								733.391		R	324.106	481.214	481.152	1183	-0.061728	300.106	181.108	not obs.			270.095	211.119	211.258	543	0.139156	462.158	19.0556	NA			R	420.148	61.0661	NA		#VALUE!		390.137	91.0767	NA
162 NL	from MH		992.502	992.695	14850	0.193625	hexosyl											C	324.106	746.276	not obs			300.106	446.17	446.378	8750	0.208116	270.095	476.181	476.161	2576	-0.020048	462.158	284.118	284.409	224.9	0.291036	C	420.148	326.128	326.036	295.1	-0.092624		390.137	356.139	not obs.
162 NL	from precursor ion		496.754	497.03	424800	0.275874						162.053	150.053	120.042	90.0317			E	324.106	875.319	875.64	438.1	0.321875	300.106	575.213	not obs.			270.095	605.224	605.565	866.5	0.341059	462.158	413.16	413.399	599.7	0.239243	E	420.148	455.171	455.526	605.6	0.355183		390.137	485.181	485.611	731.7
150 NL	from precursor ion		502.754	503.063	2781	0.308386	pentose	Amadori										L	324.106	988.403	988.529	215.5	0.126311	300.106	688.297	688.525	109.5	0.228459	270.095	718.308	718.655	902.2	0.347595	462.158	526.244	526.398	1269	0.153479	L	420.148	568.255	not obs.				390.137	598.265	not obs.
120 NL	from precursor ion		517.76	517.99	81770	0.230704	tetrose					144.042	126.032	108.021	78.0106	42.0106	24	A	324.106	1059.44	not obs			300.106	759.334	not obs.			270.095	789.345	789.572	1180	0.227681	462.158	597.281	597.52	336.9	0.238365	A	420.148	639.292	not obs.				390.137	669.302	669.722	15700
90 NL	from precursor ion		not obs.				triose	Amadori										A	324.106	1130.48	not obs.			300.106	830.371	not obs.			270.095	860.382	860.481	1229	0.099567	462.158	668.318	668.533	354.3	0.214851	A	420.148	710.329	not obs.				390.137	740.34	740.53	442.2
204 NL	from precursor ion		475.744	476.161	2576	0.417385	from Arg	Amadori				C6H12O6		180				A	324.106	1201.51	NA			300.106	901.408	901.161	165.7	-0.246983	270.095	931.419	not obs.			462.158	739.356	739.565	1031	0.209237	A	420.148	781.366	781.366		0		390.137	811.377	not obs.
162 gain	by precursor ion		658.807	658.456	1163	-0.351626	di-hexosyl											M	324.106	1332.55	NA			300.106	1032.45	1032.77	266.4	0.319933	270.095	1062.46	not obs.			462.158	870.396	not obs.			M	420.148	912.407	912.407		0		390.137	942.417	not obs.
												C6H13O5N		179				K	324.106																				K
			calc.	obs.	int.	± 0.500 Da	loss		relative Int.													1836.6					9291.6					7296.7					3815.8
162 NL	from precursor ion		496.754	497.03	424800	0.275874			1													1					5.05913					3.97294					2.07764
120 NL	from precursor ion		517.76	517.99	81770	0.230704	tetrose		0.192491						3 Glc
179 NL	from precursor ion		488.241	488.434	28370	0.192661	from Arg	Amadori	0.0667844						486.158		300.106	300.106		300.106	pentosex2		90.0317
150 NL	from precursor ion		502.754	503.063	2781	0.308386	pentose	Amadori	0.00654661								162.053	120.042		90.0317	triose		90.0317
204 NL	from precursor ion		475.744	476.161	2576	0.417385	from Arg	Amadori	0.00606403								462.158	420.148		390.137			300.106
162 gain	by precursor ion		658.807	658.456	1163	-0.351626	di-hexosyl		0.00273776														480.169
162 NL	from MH		992.502	992.695	14850	0.193625	hexosyl		1
179 NL	from MH		975.475	975.765	1038	0.289999	from Arg	Amadori	0.069899
180 NL	from MH		974.491	974.63	277.7	0.139405	hexose		0.0187003														108.042	90.0317
180 NL	from precursor ion		not obs.
90 NL	from precursor ion		not obs.				triose	Amadori																																						Postulated imidazole formation
		DONE		inter-						42 gain					72 gain					12 gain					144 gain					126 gain					108 gain						72 gain
				molecular	di-hexosyl				plus 42	glucopyranose cross ring cut (0.2A)				Amadori					Amadori					Amadori product's fructopyranosyl ring dehydratation															509.202						(0.2 A)		b+	b+
		MODEL D	PID 754	hexosyl	b+162	b+162	int.	± 0.500 Da	tetrose loss	b+ 42	b+ 42	int.	± 0.500 Da	triose loss	b+ 72	b+ 72	int.	± 0.500 Da	150	b+12	b+12	int.	± 0.500 Da	H20 loss	b+144	b+144		± 0.500 Da	2 H20 loss	b+126	b+126		± 0.500 Da	3 H20 loss	b+108	b+108		± 0.500 Da		3 H2O+ CH2O	b+78	b+78		± 0.500 Da	42-18		loss	24 gain	int.
		score 144.4	AA	transfer	calc.	obs.		err.	(0.2 A)	calc.	obs.		err.	90 loss	calc.	obs.		err.	pentose loss	calc.	obs.		err.		cal.	obs.	int.	err.		cal.	obs.	int	err.		cal.	obs.	int	err.		loss	cal.	obs.	int	err.		loss	calc.	obs.
	1	scan time:	R	162.053	319.161	not obs.			120.042	199.119	not obs.			90.0317	229.13	229.191	778.5	0.061987	150.053	169.108	169.212	126.7	0.104016	18.0106	301.151	301.486	643.4	0.335157	36.0211	283.14	283.397	159.9	0.256922	54.0317	265.13	265.317	140.5	0.187087		84.0423	235.119	235.169	58.92	0.049952	24	198.074	121.087	NA
	2	24.6012	C	162.053	584.223	not obs.			120.042	464.181	464.392	1289	0.210848	90.0317	494.192	494.041	480.7	-0.150817	150.053	434.17	434.411	4296	0.240712	18.0106	566.213	not obs.			36.0211	548.202	548.552	6446	0.350318	54.0317	530.192	529.997	11080	-0.194417		84.0423	500.181	500.2	986.2	0.019348	24	198.074	386.149	not obs
	3	z +2	E	162.053	713.266	not obs.			120.042	593.224	593.538	364.4	0.313955	90.0317	623.234	622.944	347	-0.28961	150.053	563.213	not obs.			18.0106	695.255	695.557	280.3	0.30186	36.0211	677.245	676.961	539.6	-0.283775	54.0317	659.234	not obs.				84.0423	629.224	629.617	311.7	0.393355	24	198.074	515.192	515.16	1546
	4		L	162.053	826.35	826.52	256.9	0.169731	120.042	706.308	706.633	208.6	0.324991	90.0317	736.318	736.436	3127	0.118026	150.053	676.297	676.344	1530	0.047355	18.0106	808.339	808.5	1332	0.160496	36.0211	790.329	790.607	417.9	0.278161	54.0317	772.318	772.153	1582	-0.165174		84.0423	742.308	not obs.			24	198.074	628.276	628.112	773.9
	5		A	162.053	897.387	not obs.			120.042	777.345	777.704	9813	0.359577	90.0317	807.355	807.506	6252	0.151012	150.053	747.334	747.208	441.9	-0.125759	18.0106	879.376	879.706	3845	0.329482	36.0211	861.366	861.622	182.1	0.255947	54.0317	843.355	not obs.				84.0423	813.345	not obs.			24	198.074	699.313	not obs
	6		A	162.053	968.424	968.624	149.6	0.199803	120.042	848.382	848.791	579.4	0.408763	90.0317	878.392	878.602	11370	0.209598	150.053	818.371	not obs.			18.0106	950.414	not obs.			36.0211	932.403	932.619	365.1	0.216133	54.0317	914.392	not obs.				84.0423	884.382	not obs.			24	198.074	770.35	770.382	10250
	7		A	162.053	1039.46	1039.81	381.5	0.345189	120.042	919.419	919.849	200.1	0.430149	90.0317	949.43	949.073	140	-0.356316	150.053	889.408	889.596	481.5	0.187813	18.0106	1021.45	not obs.			36.0211	1003.44	not obs.			54.0317	985.43	985.58	896.4	0.149984		84.0423	955.419	955.785	113.8	0.366349	24	198.074	841.387	841.212	644.8
	8		M	162.053	1170.5	not obs.			120.042	1050.46	not obs.			90.0317	1080.47	not obs.			150.053	1020.45	1020.75	667.8	0.297829	18.0106	1152.49	1152.96	931.6	0.47087	36.0211	1134.48	1134.83	61.43	0.347035	54.0317	1116.47	not obs.				84.0423	1086.46	not obs.			24	198.074	972.428	not obs.
	9		K		0
							788					12454.5					22495.2					7543.9					7032.3					8172.03					13698.9						1470.62
							1					15.8052					28.5472					9.57348					8.92424					10.3706					17.3844						1.86627
																								90.0317																				loss from Arg	90.0317		108.042	imidazole	Amadori na Arg
																								18.0106																					18.0106		90.0317	triose	Amadori na N-term
																								108.042																				imidazole	108.042		198.074
				inter-						42 gain					72 gain					12 gain					144 gain					126 gain					108 gain						72 gain
				molecular	di-hexosyl				plus 42	glucopyranose cross ring cut (0.2A)				Amadori					Amadori					Amadori product's fructopyranosyl ring dehydratation															509.202
		MODEL D	PID 754	hexosyl	b+162	b+162	int.	± 0.500 Da	tetrose loss	120 loss b+	120 loss b+	int.	± 0.500 Da	triose loss	90 loss b+	90 loss b+	int.	± 0.500 Da	150	150 loss b+	150 loss b+	int.	± 0.500 Da	H20 loss	18 loss b+	18 loss b+		± 0.500 Da	2 H20 loss	36 loss b+	36 loss b+		± 0.500 Da	3 H20 loss	54 loss b+	54 loss b+		± 0.500 Da		3 H2O+ CH2O	72 gain b+	54 loss b+		± 0.500 Da		179	179 loss	179 loss b+
		score 144.4	AA	transfer	calc.	obs.		err.	(0.2 A)	calc.	obs.		err.	90 loss	calc.	obs.		err.	pentose loss	calc.	obs.		err.		cal.	obs.	int.	err.		cal.	obs.	int	err.		cal.	obs.	int	err.		loss	cal.	obs.	int	err.		loss	cal.	obs.	int
	1	scan time:	R	162.053	319.161	not obs.			120.042	199.119	not obs.			90.0317	229.13	229.191	778.5	0.061987	150.053	169.108	169.212	126.7	0.104016	18.0106	301.151	301.486	643.4	0.335157	36.0211	283.14	283.397	159.9	0.256922	54.0317	265.13	265.317	140.5	0.187087		84.0423	235.119	235.169	58.92	0.049952	1	179.079	140.082	not obs.
	2	24.6012	C	162.053	584.223	not obs.			120.042	464.181	464.392	1289	0.210848	90.0317	494.192	494.041	480.7	-0.150817	150.053	434.17	434.411	4296	0.240712	18.0106	566.213	not obs.			36.0211	548.202	548.552	6446	0.350318	54.0317	530.192	529.997	11080	-0.194417		84.0423	500.181	500.2	986.2	0.019348	2	179.079	405.144	405.27	2001
	3	z +2	E	162.053	713.266	not obs.			120.042	593.224	593.538	364.4	0.313955	90.0317	623.234	622.944	347	-0.28961	150.053	563.213	not obs.			18.0106	695.255	695.557	280.3	0.30186	36.0211	677.245	676.961	539.6	-0.283775	54.0317	659.234	not obs.				84.0423	629.224	629.617	311.7	0.393355	3	179.079	534.186	534.121	11260
	4		L	162.053	826.35	826.52	256.9	0.169731	120.042	706.308	706.633	208.6	0.324991	90.0317	736.318	736.436	3127	0.118026	150.053	676.297	676.344	1530	0.047355	18.0106	808.339	808.5	1332	0.160496	36.0211	790.329	790.607	417.9	0.278161	54.0317	772.318	772.153	1582	-0.165174		84.0423	742.308	not obs.			4	179.079	647.27	647.516	19600
	5		A	162.053	897.387	not obs.			120.042	777.345	777.704	9813	0.359577	90.0317	807.355	807.506	6252	0.151012	150.053	747.334	747.208	441.9	-0.125759	18.0106	879.376	879.706	3845	0.329482	36.0211	861.366	861.622	182.1	0.255947	54.0317	843.355	not obs.				84.0423	813.345	not obs.			5	179.079	718.308	718.655	902.2
	6		A	162.053	968.424	968.424		0	120.042	848.382	848.791	579.4	0.408763	90.0317	878.392	878.602	11370	0.209598	150.053	818.371	not obs.			18.0106	950.414	950.414		0	36.0211	932.403	932.403		0	54.0317	914.392	914.392		0		84.0423	884.382	884.382		0	6	179.079	789.345	789.572	1180
	7		A	162.053	1039.46	1039.46		0	120.042	919.419	919.419		0	90.0317	949.43	949.43		0	150.053	889.408	889.408		0	18.0106	1021.45	1021.45		0	36.0211	1003.44	1003.44		0	54.0317	985.43	985.43		0		84.0423	955.419	955.419		0	7	179.079	860.382	860.481	1229
	8		M	162.053	1170.5	1170.5		0	120.042	1050.46	1050.46			90.0317	1080.47	1080.47		0	150.053	1020.45	1020.45			18.0106	1152.49	1152.49		0	36.0211	1134.48	1134.48		0	54.0317	1116.47	1116.47		0		84.0423	1086.46	1086.46		0	8	179.079	991.422	991.726	1102
																																														179.079	-179.079
																																																	37274.2
																																																	47.3023
																																												C6H13O5N		179.079374			0.462188
																																									17			C7H14O5N2
	270.095																			150.053
	240.085																			300.106	-138.053		300.106																					C7H12O5N2		204.074623
	180.063											b-108									b-138
				PID 222								108.042								Amadori
				AA		108.042			PID 222	tetrose &	150 loss b+	150 loss b+	int.	± 0.500 Da	2 trioses	150 loss b+	150 loss b+	int.	± 0.500 Da	300	150 loss b+	150 loss b+	int.	± 0.500 Da
				C					AA	pentose loss	calc.	obs.		err.	loss	calc.	obs.		err.	2 pentoses loss	calc.	obs.		err.
				E						270.095	314.128	not obs.			180.063	404.16	not obs.			300.106	284.118	NA
				L						270.095	443.171	not obs.			180.063	533.202	b2-10	2927		300.106	413.16	257.105	8626	-156.055
				A						270.095	556.255	400.405	745	-155.85	180.063	646.286	not obs.			300.106	526.244	370.378	3941	-155.866
				A						270.095	627.292	471.185	1992	-156.107	180.063	717.324	b4-10	209.7		300.106	597.281	441	3867	-156.281
				A						270.095	698.329	542.012	324.6	-156.317	180.063	788.361	b5-10	674.6		300.106	668.318	512.497	687.7	-155.822
				M						270.095	769.366	612.896	257.8	-156.47	180.063	859.398	b6-18	702.2		300.106	739.356	583.46	836	-155.896
				K						270.095	900.407	743.871	123.9	-156.536	180.063	990.438				300.106	870.396	714.514	1366	-155.882
																	doubtful
													3443.3										19323.7
													4.36967										24.5225
																			C6H12O6		180.063390
																			C6H13O5N		179.079374
																			C6H10O5		162.053
[truncated: 35 more columns]

## Sheet: CID RC +162 ELAAAMK
PID	Prot. Rank	Pos.	Sequence	Glycans	Mods (variable)	PEP	Score	z	Obs. m/z	Calc. m/z	Obs. MH	Calc. MH	ppm err.	Off- By-X	Cleavage	Delta Score	Delta Mod. Score	Protein Name	Fragment Type	Comment	Scan #	Scan Time	Glycans Pos.	Obs.M	Calc.M
754	C-term K	23	G.RC[+162.05282]ELAAAMK.R		C2(Hex / 162.0528)	0.0279	144.4	2	577.778	577.781	1154.55	1154.55	-5.59125		NRagged	7.53264	7.53264	>sp|P00698|LYSC_CHICK Lysozyme C OS=Gallus gallus GN=LYZ PE=1 SV=1	collision-induced dissociation	00527771buch_ab4liz2_s.3674.3674.2	controllerType=0 controllerNumber=1 scan=3674	24.6012		1153.54	1153.55	992.502	992.695	14850	0.193625	496.754	497.03	424800	0.275874	974.491	974.63	277.7	-0.139405	487.749	not obs.			1155.56	1.00728	162.053	180.063	1155.56	496.754	18.0106	36.0211
	G.RC[+162.05282]ELAAAMK.R
																																	calc.	obs.	int.	± 0.500 Da	loss
																														162 NL	from precursor ion		496.754	497.03	424800	0.275874				1
																														120 NL	from precursor ion		517.76	517.99	81770	0.230704	tetrose			0.192491
																				a+	b+		AA		x+	y+				179 NL	from precursor ion		488.241	488.434	28370	0.192661	from Arg	Amadori		0.0667844
	b+		AA		y+						b++		AA		y++					129.113	157.108	1	R	9						150 NL	from precursor ion		502.754	503.063	2781	0.308386	pentose	Amadori		0.00654661
	157.108	1	R	9							79.0578	1	R	9						394.175	422.17	2	C	8	1024.43	998.453				204 NL	from precursor ion		475.744	476.161	2576	0.417385	from Arg	Amadori		0.00606403
	422.17	2	C	8	998.453						211.589	2	C	8	499.73					523.218	551.213	3	E	7	759.371	733.391				162 gain	by precursor ion		658.807	658.456	1163	-0.351626	di-hexosyl			0.00273776
	551.213	3	E	7	733.391						276.11	3	E	7	367.199					636.302	664.297	4	L	6	630.328	604.349				162 NL	from MH		992.502	992.695	14850	0.193625	hexosyl			1
	664.297	4	L	6	604.349						332.652	4	L	6	302.678					707.339	735.334	5	A	5	517.244	491.265				179 NL	from MH		975.475	975.765	1038	0.289999	from Arg	Amadori		0.069899
	735.334	5	A	5	491.265						368.171	5	A	5	246.136					778.376	806.371	6	A	4	446.207	420.228				180 NL	from MH		974.491	974.63	277.7	0.139405	hexose			0.0187003
	806.371	6	A	4	420.228						403.689	6	A	4	210.617					849.413	877.408	7	A	3	375.17	349.19				180 NL	from precursor ion		not obs.
	877.408	7	A	3	349.19						439.208	7	A	3	175.099					980.454	1008.45	8	M	2	304.133	278.153				90 NL	from precursor ion		not obs.				triose	Amadori
	1008.45	8	M	2	278.153						504.728	8	M	2	139.58							9	K	1	173.092	147.113
		9	K	1	147.113							9	K	1	74.06
																				composition: C(40) H(71) N(13) O(11) S(2)
	composition: C(40) H(71) N(13) O(11) S(2)										composition: C(40) H(71) N(13) O(11) S(2)									neutral mass: 1153.547127
	neutral mass: 1153.547127										neutral mass: 1153.547127									+ 1 charge: 1154.554403
	+ 1 charge: 1154.554403										+ 1 charge: 1154.554403									+ 2 charge: 577.780840
	+ 2 charge: 577.780840										+ 2 charge: 577.780840									+ 3 charge: 385.522985
	+ 3 charge: 385.522985										+ 3 charge: 385.522985									+ 4 charge: 289.394058
	+ 4 charge: 289.394058										+ 4 charge: 289.394058									+ 5 charge: 231.716702
	+ 5 charge: 231.716702										+ 5 charge: 231.716702									+ 6 charge: 193.265131
	+ 6 charge: 193.265131										+ 6 charge: 193.265131									+ 7 charge: 165.799723
	+ 7 charge: 165.799723										+ 7 charge: 165.799723									+ 8 charge: 145.200667
	+ 8 charge: 145.200667										+ 8 charge: 145.200667									+ 9 charge: 129.179179
	+ 9 charge: 129.179179										+ 9 charge: 129.179179									+10 charge: 116.361989
	+10 charge: 116.361989										+10 charge: 116.361989
																													488.434
																													975.765
																1206
											Glycosyl transfer and glucopyranose cross ring cut (0.2A)					5315					Amadori product fructopyranosyl ring fragmentation									26000	Amadori product dehydration pathway
											hexosyl transfer											triose loss					pentose loss
		MODEL D	PID 754		y+	y+		± 0.500 Da		y+	y+		± 0.500 Da	(0.2 A)	y+	y+		± 0.500 Da		y+	y+		± 0.500 Da		y+	y+		± 0.500 Da		y+	y+		± 0.500 Da		y+	y+		± 0.500 Da		y+	y+		± 0.500 Da		y+	y+		± 0.500 Da	MODEL D
		score 144.4	AA		calc.	obs.	int.	err.		162 gain	162 gain	int.	err.	120	42 gain	42 gain	int.	err.	162-90	72 gain	72 gain	int.	err.	162-150	12 gain	12 gain	int.	err.	18 loss	144 gain	144 gain	int.	err.	36 loss	126 gain	126 gain	int.	err.	54 loss	108 gain	108 gain	int.	err.	CH2O	78 gain	78 gain	int.	err.	score 144.4
		scan time:	R	9						calc.	obs.			tetrose loss	calc.	obs.			triose loss	calc.	obs.			pentose loss	calc.	obs.				calc.	obs.				calc.	obs.				calc.	obs.			loss	calc.	obs.			scan time:
		24.6012	C	8	998.453	998.681	1047	0.227408	162.053	1160.51	not obs.			42.0106	1040.46	1040.66	246.9	0.197408	72.0211	1070.47	not obs.			12	1010.45	1010.62	6358	0.169108	144.042	1142.5	not obs.			126.032	1124.48	not obs.		#VALUE!	108.021	1106.47	not obs.			78.0106	1076.46	not obs.			24.6012
		z +2	E	7	733.391	733.585	596.5	0.193413	162.053	895.444	not obs.			42.0106	775.402	774.989	816.7	-0.413387	72.0211	805.412	805.635	10170	0.222688	12	745.391	745.437	296.3	0.045713	144.042	877.434	877.582		0.148113	126.032	859.423	not obs.			108.021	841.412	841.212	644.8	-0.200187	78.0106	811.402	not obs.			z +2
			L	6	604.349	604.535	2357	0.186806	162.053	766.402	not obs.			42.0106	646.359	646.452		0.092506	72.0211	676.37	676.344	1530	-0.025419	12	616.349	616.251	3096	-0.097894	144.042	748.391	748.548	665.2	0.157006	126.032	730.38	730.604	492.1	0.223106	108.021	712.37	711.978	3695	-0.391694	78.0106	682.359	not obs.
			A	5	491.265	491.328	3349	0.06367	162.053	653.317	653.422	268.9	0.10425	42.0106	533.275	533.248		-0.02693	72.0211	563.286	not obs.			12	503.265	503.063	2781	-0.20183	144.042	635.307	635.074	7781	-0.233299	126.032	617.296	617.234	2174	-0.06283	108.021	599.286	not obs.			78.0106	569.275	not obs.
			A	4	420.228	420.327	3624	0.099984	162.053	582.28	581.806	84.09	-0.474536	42.0106	462.238	462.455	49160	0.217184	72.0211	492.249	492.553	2930	0.303859	12	432.228	432.301	1074	0.073484	144.042	564.27	not obs.			126.032	546.259	546.62	3901	0.360684	108.021	528.249	528.702	2825	0.453784	78.0106	498.238	497.888	47800	-0.349816
			A	3	349.19	349.358	7388	0.167697	162.053	511.243	510.856	7063	-0.387323	42.0106	391.201	391.384	4365	0.183197	72.0211	421.212	421.274	1184	0.062852	12	361.19	361.103	197.1	-0.087003	144.042	493.233	not obs.			126.032	475.222	not obs.			108.021	457.212	not obs.			78.0106	427.201	427.144	1138	-0.057403
			M	2	278.153	278.277	6823	0.123711	162.053	440.206	440.538	2358	0.331591	42.0106	320.164	not obs.			72.0211	350.174	350.393	2852	0.218786	12	290.153	290.356	4595	0.202511	144.042	422.196	not obs.			126.032	404.185	403.971	3078	-0.213889	108.021	386.174	386.355	48.44	0.180211	78.0106	356.164	not obs.
			K	1	147.113	147.184	2011	0.071596	162.053	309.166	309.496	430.6	0.330476	42.0106	189.123	189.243	231.9	0.119096	72.0211	219.134	not obs.			12	159.113	159.185	146.2	0.072296	144.042	291.155	291.301	796	0.145996	126.032	273.145	273.304	363.9	0.159096	108.021	255.134	255.343	232.1	0.209396	78.0106	225.123	225.371	1783	0.247196
	27195.5						27195.5					10204.6					54820.5					8496					11889.3					9242.2					10009					7445.34					50721
			162.053				1					0.375231				b3-18	2.01579					0.312405					0.437179				b7	0.339843					0.368039					0.273771					1.86505
			120.042									1				b4-18	5.37214					0.832567					1.16509					0.90569					0.980833					0.729607					4.97041
			18.0106		24												1.98
			138.053

					hexose ring fragmentation																														424800
									glucopyranosyl ring cross cut (0.2 A)					Amadori					Amadori					fructopyranosyl ring dehydratation
			PID 754		b+	b+	int.	± 0.500 Da	tetrose loss	120 loss b+	120 loss b+	int.	± 0.500 Da	triose loss	90 loss b+	90 loss b+	int.	± 0.500 Da	150	150 loss b+	150 loss b+	int.	± 0.500 Da	H20 loss	18 loss b+	18 loss b+		± 0.500 Da	2 H20 loss	36 loss b+	36 loss b+		± 0.500 Da	3 H20 loss	54 loss b+	54 loss b+		± 0.500 Da	3 H20 +CH2O loss	84 loss b+	84 loss b+		± 0.500 Da	3H2O +COH2 loss	78 gain b+	78 gain b+		± 0.500 Da
			AA		calc.	obs. b+		err.	(0.2 A)	calc.	obs.		err.	90 loss	calc.	obs.		err.	pentose loss	calc.	obs.		err.		cal.	obs.	int.	err.		cal.	obs.	int	err.		cal.	obs.	int	err.		cal.	obs.	int	err.		cal.	obs.	int	err.
			R	1	157.108	157.235	178	0.126612	120.042	NA				90.0317	NA				150.053	NA				18.0106	139.098	assigned by	Byonic		36.0211	121.087	NA			54.0317	103.077	NA			84.0422	73.0662	NA			78.0106	235.119				R
			C	2	422.17	422.406	411.3	0.236108	120.042	302.128	not obs.			90.0317	332.139	332.159	3236	0.020403	150.053	272.118	272.337	1035	0.219932	18.0106	404.16	403.971	3078	-0.188727	36.0211	386.149	386.355	48.44	0.205338	54.0317	368.139	368.352	368.5	0.212903	84.0422	338.128	338.469	743.4	0.340928	78.0106	500.181				C
	533.202		E	3	551.213	551.075	6386	-0.138185	120.042	431.171	431.292	279.4	0.121375	90.0317	461.181	461.399	13450	0.21771	150.053	401.16	not obs.			18.0106	533.202	533.248	5315	0.04588	36.0211	515.192	515.16	1546	-0.032155	54.0317	497.181	497.03		-0.15089	84.0422	467.171	467.589	6848	0.418635	78.0106	629.224			-629.224	E
	646.286		L	4	664.297	664.441	2279	0.144151	120.042	544.255	544.561	5234	0.305711	90.0317	574.265	not obs.			150.053	514.244	514.016	2538	-0.228525	18.0106	646.286	646.452	1206	0.165316	36.0211	628.276	628.112	773.9	-0.164219	54.0317	610.265	not obs.			84.0422	580.255	not obs.			78.0106	742.308			-742.308	L
	717.324		A	5	735.334	735.53	5853	0.195737	120.042	615.292	615.207	1904	-0.084503	90.0317	645.302	645.464	926.7	0.161632	150.053	585.281	585.323	139.7	0.041761	18.0106	717.324	717.579	1368	0.255102	36.0211	699.313	not obs.			54.0317	681.302	681.714	55.69	0.411232	84.0422	651.292	651.371	298.8	0.079357	78.0106	813.345			-813.345	A
	788.361		A	6	806.371	806.574	19040	0.202623	120.042	686.329	686.447	218.6	0.118383	90.0317	716.34	716.63	642.9	0.290818	150.053	656.318	656.506	601.9	0.188047	18.0106	788.361	788.567	5491	0.206788	36.0211	770.35	770.382	10250	0.032153	54.0317	752.34	752.766	2061	0.426218	84.0422	722.329	721.855	1176	-0.473957	78.0106	884.382				A
	859.398		A	7	877.408	877.582	26000	0.173309	120.042	757.366	757.676	67.35	0.310069	90.0317	787.377	787.766	12870	0.389204	150.053	727.356	not obs.			18.0106	859.398	not obs.			36.0211	841.387	841.212	644.8	-0.175061	54.0317	823.377	not obs.			84.0422	793.366	793.724	81.95	0.358029	78.0106	955.419				A
	990.438		M	8	1008.45	1008.63	20500	0.180125	120.042	888.407	not obs.			90.0317	918.417	918.609	337.2	0.19142	150.053	858.396	not obs.			18.0106	990.438	990.607	626.7	0.16859	36.0211	972.428	not obs.			54.0317	954.417	954.635	286.2	0.21802	84.0422	924.407	924.762	1440	0.355145	78.0106	1086.46				M
			K	9			80647.3					7703.35					28226.8					3279.6					14006.7					13263.1					2771.39					9844.75					0		K
							1					0.095519					0.350003					0.040666					0.173678					0.164459			162 NL		0.0343643					0.122072
			calc.	obs.	int.	± 0.500 Da	loss																																	300.106	2Glc added
180 NL	from MH		974.491	974.63	277.7	0.139405	hexose												add 2Glc	hexosyl transfer	di-hexosyl				2 pentoses										2 pentoses					120.042	hexosyl transfer	di-hexosyl					hexosyl transfer	di-hexosyl
180 NL	from precursor ion		not obs.									H2O	2 H2O	3 H2O				PID 754	hexosyl	b+324	b+324	int.	± 0.500 Da	lo	loss					loss					& hexosyl				PID 754		b+162	b+162	int.	± 0.500 Da		hexosyl	b+162	b+162	int.
179 NL	from MH		975.475	975.765	1038	0.289999	from Arg	Amadori				18.0106	36.0211	54.0317				AA	transfer	calc.	obs.		err.		calc.	obs.	int.	err.		calc.	obs.	int.	err.		loss	obs.	int.	err.	AA	loss	calc.	obs.		err.		loss	calc.	obs.
179 NL	from precursor ion		488.241	488.434	28370	0.192661	from Arg	Amadori								733.391		R	324.106	481.214	481.152	1183	-0.061728	300.106	181.108	not obs.			270.095	211.119	211.258	543	0.139156	462.158	19.0556	NA			R	420.148	61.0661	NA		#VALUE!		390.137	91.0767	NA
162 NL	from MH		992.502	992.695	14850	0.193625	hexosyl											C	324.106	746.276	not obs			300.106	446.17	446.378	8750	0.208116	270.095	476.181	476.161	2576	-0.020048	462.158	284.118	284.409	224.9	0.291036	C	420.148	326.128	326.036	295.1	-0.092624		390.137	356.139	not obs.
162 NL	from precursor ion		496.754	497.03	424800	0.275874						162.053	150.053	120.042	90.0317			E	324.106	875.319	875.64	438.1	0.321875	300.106	575.213	not obs.			270.095	605.224	605.565	866.5	0.341059	462.158	413.16	413.399	599.7	0.239243	E	420.148	455.171	455.526	605.6	0.355183		390.137	485.181	485.611	731.7
150 NL	from precursor ion		502.754	503.063	2781	0.308386	pentose	Amadori										L	324.106	988.403	988.529	215.5	0.126311	300.106	688.297	688.525	109.5	0.228459	270.095	718.308	718.655	902.2	0.347595	462.158	526.244	526.398	1269	0.153479	L	420.148	568.255	not obs.				390.137	598.265	not obs.
120 NL	from precursor ion		517.76	517.99	81770	0.230704	tetrose					144.042	126.032	108.021	78.0106	42.0106	24	A	324.106	1059.44	not obs			300.106	759.334	not obs.			270.095	789.345	789.572	1180	0.227681	462.158	597.281	597.52	336.9	0.238365	A	420.148	639.292	not obs.				390.137	669.302	669.722	15700
90 NL	from precursor ion		not obs.				triose	Amadori										A	324.106	1130.48	not obs.			300.106	830.371	not obs.			270.095	860.382	860.481	1229	0.099567	462.158	668.318	668.533	354.3	0.214851	A	420.148	710.329	not obs.				390.137	740.34	740.53	442.2
204 NL	from precursor ion		475.744	476.161	2576	0.417385	from Arg	Amadori				C6H12O6		180				A	324.106	1201.51	NA			300.106	901.408	901.161	165.7	-0.246983	270.095	931.419	not obs.			462.158	739.356	739.565	1031	0.209237	A	420.148	781.366	781.366		0		390.137	811.377	not obs.
162 gain	by precursor ion		658.807	658.456	1163	-0.351626	di-hexosyl											M	324.106	1332.55	NA			300.106	1032.45	1032.77	266.4	0.319933	270.095	1062.46	not obs.			462.158	870.396	not obs.			M	420.148	912.407	912.407		0		390.137	942.417	not obs.
												C6H13O5N		179				K	324.106																				K
			calc.	obs.	int.	± 0.500 Da	loss		relative Int.													1836.6					9291.6					7296.7					3815.8
162 NL	from precursor ion		496.754	497.03	424800	0.275874			1													1					5.05913					3.97294					2.07764
120 NL	from precursor ion		517.76	517.99	81770	0.230704	tetrose		0.192491						3 Glc
179 NL	from precursor ion		488.241	488.434	28370	0.192661	from Arg	Amadori	0.0667844						486.158		300.106	300.106		300.106	pentosex2		90.0317
150 NL	from precursor ion		502.754	503.063	2781	0.308386	pentose	Amadori	0.00654661								162.053	120.042		90.0317	triose		90.0317
204 NL	from precursor ion		475.744	476.161	2576	0.417385	from Arg	Amadori	0.00606403								462.158	420.148		390.137			300.106
162 gain	by precursor ion		658.807	658.456	1163	-0.351626	di-hexosyl		0.00273776														480.169
162 NL	from MH		992.502	992.695	14850	0.193625	hexosyl		1
179 NL	from MH		975.475	975.765	1038	0.289999	from Arg	Amadori	0.069899
180 NL	from MH		974.491	974.63	277.7	0.139405	hexose		0.0187003														108.042	90.0317
180 NL	from precursor ion		not obs.
90 NL	from precursor ion		not obs.				triose	Amadori																																						Postulated imidazole formation
		DONE		inter-						42 gain					72 gain					12 gain					144 gain					126 gain					108 gain						72 gain
				molecular	di-hexosyl				plus 42	glucopyranose cross ring cut (0.2A)				Amadori					Amadori					Amadori product's fructopyranosyl ring dehydratation															509.202						(0.2 A)		b+	b+
		MODEL D	PID 754	hexosyl	b+162	b+162	int.	± 0.500 Da	tetrose loss	b+ 42	b+ 42	int.	± 0.500 Da	triose loss	b+ 72	b+ 72	int.	± 0.500 Da	150	b+12	b+12	int.	± 0.500 Da	H20 loss	b+144	b+144		± 0.500 Da	2 H20 loss	b+126	b+126		± 0.500 Da	3 H20 loss	b+108	b+108		± 0.500 Da		3 H2O+ CH2O	b+78	b+78		± 0.500 Da	42-18		loss	24 gain	int.
		score 144.4	AA	transfer	calc.	obs.		err.	(0.2 A)	calc.	obs.		err.	90 loss	calc.	obs.		err.	pentose loss	calc.	obs.		err.		cal.	obs.	int.	err.		cal.	obs.	int	err.		cal.	obs.	int	err.		loss	cal.	obs.	int	err.		loss	calc.	obs.
	1	scan time:	R	162.053	319.161	not obs.			120.042	199.119	not obs.			90.0317	229.13	229.191	778.5	0.061987	150.053	169.108	169.212	126.7	0.104016	18.0106	301.151	301.486	643.4	0.335157	36.0211	283.14	283.397	159.9	0.256922	54.0317	265.13	265.317	140.5	0.187087		84.0423	235.119	235.169	58.92	0.049952	24	198.074	121.087	NA
	2	24.6012	C	162.053	584.223	not obs.			120.042	464.181	464.392	1289	0.210848	90.0317	494.192	494.041	480.7	-0.150817	150.053	434.17	434.411	4296	0.240712	18.0106	566.213	not obs.			36.0211	548.202	548.552	6446	0.350318	54.0317	530.192	529.997	11080	-0.194417		84.0423	500.181	500.2	986.2	0.019348	24	198.074	386.149	not obs
	3	z +2	E	162.053	713.266	not obs.			120.042	593.224	593.538	364.4	0.313955	90.0317	623.234	622.944	347	-0.28961	150.053	563.213	not obs.			18.0106	695.255	695.557	280.3	0.30186	36.0211	677.245	676.961	539.6	-0.283775	54.0317	659.234	not obs.				84.0423	629.224	629.617	311.7	0.393355	24	198.074	515.192	515.16	1546
	4		L	162.053	826.35	826.52	256.9	0.169731	120.042	706.308	706.633	208.6	0.324991	90.0317	736.318	736.436	3127	0.118026	150.053	676.297	676.344	1530	0.047355	18.0106	808.339	808.5	1332	0.160496	36.0211	790.329	790.607	417.9	0.278161	54.0317	772.318	772.153	1582	-0.165174		84.0423	742.308	not obs.			24	198.074	628.276	628.112	773.9
	5		A	162.053	897.387	not obs.			120.042	777.345	777.704	9813	0.359577	90.0317	807.355	807.506	6252	0.151012	150.053	747.334	747.208	441.9	-0.125759	18.0106	879.376	879.706	3845	0.329482	36.0211	861.366	861.622	182.1	0.255947	54.0317	843.355	not obs.				84.0423	813.345	not obs.			24	198.074	699.313	not obs
	6		A	162.053	968.424	968.624	149.6	0.199803	120.042	848.382	848.791	579.4	0.408763	90.0317	878.392	878.602	11370	0.209598	150.053	818.371	not obs.			18.0106	950.414	not obs.			36.0211	932.403	932.619	365.1	0.216133	54.0317	914.392	not obs.				84.0423	884.382	not obs.			24	198.074	770.35	770.382	10250
	7		A	162.053	1039.46	1039.81	381.5	0.345189	120.042	919.419	919.849	200.1	0.430149	90.0317	949.43	949.073	140	-0.356316	150.053	889.408	889.596	481.5	0.187813	18.0106	1021.45	not obs.			36.0211	1003.44	not obs.			54.0317	985.43	985.58	896.4	0.149984		84.0423	955.419	955.785	113.8	0.366349	24	198.074	841.387	841.212	644.8
	8		M	162.053	1170.5	not obs.			120.042	1050.46	not obs.			90.0317	1080.47	not obs.			150.053	1020.45	1020.75	667.8	0.297829	18.0106	1152.49	1152.96	931.6	0.47087	36.0211	1134.48	1134.83	61.43	0.347035	54.0317	1116.47	not obs.				84.0423	1086.46	not obs.			24	198.074	972.428	not obs.
	9		K		0
							788					12454.5					22495.2					7543.9					7032.3					8172.03					13698.9						1470.62
							1					15.8052					28.5472					9.57348					8.92424					10.3706					17.3844						1.86627
																								90.0317																				loss from Arg	90.0317		108.042	imidazole	Amadori na Arg
																								18.0106																					18.0106		90.0317	triose	Amadori na N-term
																								108.042																				imidazole	108.042		198.074
				inter-						42 gain					72 gain					12 gain					144 gain					126 gain					108 gain						72 gain
				molecular	di-hexosyl				plus 42	glucopyranose cross ring cut (0.2A)				Amadori					Amadori					Amadori product's fructopyranosyl ring dehydratation															509.202
		MODEL D	PID 754	hexosyl	b+162	b+162	int.	± 0.500 Da	tetrose loss	120 loss b+	120 loss b+	int.	± 0.500 Da	triose loss	90 loss b+	90 loss b+	int.	± 0.500 Da	150	150 loss b+	150 loss b+	int.	± 0.500 Da	H20 loss	18 loss b+	18 loss b+		± 0.500 Da	2 H20 loss	36 loss b+	36 loss b+		± 0.500 Da	3 H20 loss	54 loss b+	54 loss b+		± 0.500 Da		3 H2O+ CH2O	72 gain b+	54 loss b+		± 0.500 Da		179	179 loss	179 loss b+
		score 144.4	AA	transfer	calc.	obs.		err.	(0.2 A)	calc.	obs.		err.	90 loss	calc.	obs.		err.	pentose loss	calc.	obs.		err.		cal.	obs.	int.	err.		cal.	obs.	int	err.		cal.	obs.	int	err.		loss	cal.	obs.	int	err.		loss	cal.	obs.	int
	1	scan time:	R	162.053	319.161	not obs.			120.042	199.119	not obs.			90.0317	229.13	229.191	778.5	0.061987	150.053	169.108	169.212	126.7	0.104016	18.0106	301.151	301.486	643.4	0.335157	36.0211	283.14	283.397	159.9	0.256922	54.0317	265.13	265.317	140.5	0.187087		84.0423	235.119	235.169	58.92	0.049952	1	179.079	140.082	not obs.
	2	24.6012	C	162.053	584.223	not obs.			120.042	464.181	464.392	1289	0.210848	90.0317	494.192	494.041	480.7	-0.150817	150.053	434.17	434.411	4296	0.240712	18.0106	566.213	not obs.			36.0211	548.202	548.552	6446	0.350318	54.0317	530.192	529.997	11080	-0.194417		84.0423	500.181	500.2	986.2	0.019348	2	179.079	405.144	405.27	2001
	3	z +2	E	162.053	713.266	not obs.			120.042	593.224	593.538	364.4	0.313955	90.0317	623.234	622.944	347	-0.28961	150.053	563.213	not obs.			18.0106	695.255	695.557	280.3	0.30186	36.0211	677.245	676.961	539.6	-0.283775	54.0317	659.234	not obs.				84.0423	629.224	629.617	311.7	0.393355	3	179.079	534.186	534.121	11260
	4		L	162.053	826.35	826.52	256.9	0.169731	120.042	706.308	706.633	208.6	0.324991	90.0317	736.318	736.436	3127	0.118026	150.053	676.297	676.344	1530	0.047355	18.0106	808.339	808.5	1332	0.160496	36.0211	790.329	790.607	417.9	0.278161	54.0317	772.318	772.153	1582	-0.165174		84.0423	742.308	not obs.			4	179.079	647.27	647.516	19600
	5		A	162.053	897.387	not obs.			120.042	777.345	777.704	9813	0.359577	90.0317	807.355	807.506	6252	0.151012	150.053	747.334	747.208	441.9	-0.125759	18.0106	879.376	879.706	3845	0.329482	36.0211	861.366	861.622	182.1	0.255947	54.0317	843.355	not obs.				84.0423	813.345	not obs.			5	179.079	718.308	718.655	902.2
	6		A	162.053	968.424	968.424		0	120.042	848.382	848.791	579.4	0.408763	90.0317	878.392	878.602	11370	0.209598	150.053	818.371	not obs.			18.0106	950.414	950.414		0	36.0211	932.403	932.403		0	54.0317	914.392	914.392		0		84.0423	884.382	884.382		0	6	179.079	789.345	789.572	1180
	7		A	162.053	1039.46	1039.46		0	120.042	919.419	919.419		0	90.0317	949.43	949.43		0	150.053	889.408	889.408		0	18.0106	1021.45	1021.45		0	36.0211	1003.44	1003.44		0	54.0317	985.43	985.43		0		84.0423	955.419	955.419		0	7	179.079	860.382	860.481	1229
	8		M	162.053	1170.5	1170.5		0	120.042	1050.46	1050.46			90.0317	1080.47	1080.47		0	150.053	1020.45	1020.45			18.0106	1152.49	1152.49		0	36.0211	1134.48	1134.48		0	54.0317	1116.47	1116.47		0		84.0423	1086.46	1086.46		0	8	179.079	991.422	991.726	1102
																																														179.079	-179.079
																																																	37274.2
																																																	47.3023
																																												C6H13O5N		179.079374			0.462188
																																									17			C7H14O5N2
	270.095																			150.053
	240.085																			300.106	-138.053		300.106																					C7H12O5N2		204.074623
	180.063											b-108									b-138
				PID 222								108.042								Amadori
				AA		108.042			PID 222	tetrose &	150 loss b+	150 loss b+	int.	± 0.500 Da	2 trioses	150 loss b+	150 loss b+	int.	± 0.500 Da	300	150 loss b+	150 loss b+	int.	± 0.500 Da
				C					AA	pentose loss	calc.	obs.		err.	loss	calc.	obs.		err.	2 pentoses loss	calc.	obs.		err.
				E						270.095	314.128	not obs.			180.063	404.16	not obs.			300.106	284.118	NA
				L						270.095	443.171	not obs.			180.063	533.202	b2-10	2927		300.106	413.16	257.105	8626	-156.055
				A						270.095	556.255	400.405	745	-155.85	180.063	646.286	not obs.			300.106	526.244	370.378	3941	-155.866
				A						270.095	627.292	471.185	1992	-156.107	180.063	717.324	b4-10	209.7		300.106	597.281	441	3867	-156.281
				A						270.095	698.329	542.012	324.6	-156.317	180.063	788.361	b5-10	674.6		300.106	668.318	512.497	687.7	-155.822
				M						270.095	769.366	612.896	257.8	-156.47	180.063	859.398	b6-18	702.2		300.106	739.356	583.46	836	-155.896
				K						270.095	900.407	743.871	123.9	-156.536	180.063	990.438				300.106	870.396	714.514	1366	-155.882
																	doubtful
													3443.3										19323.7
													4.36967										24.5225
																			C6H12O6		180.063390
																			C6H13O5N		179.079374
																			C6H10O5		162.053
[truncated: 35 more columns]

## Sheet: CID_WWC +162 NDGR
PID	Prot. Rank	Pos.	Sequence	Glycans	Mods (variable)	PEP	Score	z	Obs. m/z	Calc. m/z	Obs. MH	Calc. MH	ppm err.	Off- By-X	Cleavage	Delta Score	Delta Mod. Score	Protein Name	Fragment Type	Comment	Scan #	Scan Time	Glycans Pos.
1189	1	80	R.WWC[+162.05282]NDGR.T		C3(Hex / 162.0528)	6.12e-05	192.2	2	549.716	549.719	1098.43	1098.43	-4.72158		Specific	192.249	192.249	>sp|P00698|LYSC_CHICK Lysozyme C OS=Gallus gallus GN=LYZ PE=1 SV=1	collision-induced dissociation	00527771buch_ab4liz2_s.5183.5183.2	controllerType=0 controllerNumber=1 scan=5183	29.9908
1210	1	80	R.WWC[+162.05282]NDGR.T		C3(Hex / 162.0528)	6.12e-05	186.8	2	549.716	549.719	1098.43	1098.43	-4.83272		Specific	186.782	186.782	>sp|P00698|LYSC_CHICK Lysozyme C OS=Gallus gallus GN=LYZ PE=1 SV=1	collision-induced dissociation	00527771buch_ab4liz2_s.5214.5214.2	controllerType=0 controllerNumber=1 scan=5214	30.0904
1256	1	80	R.WWC[+162.05282]NDGR.T		C3(Hex / 162.0528)	0.000106	185.5	2	549.716	549.719	1098.43	1098.43	-4.94385		Specific	185.535	185.535	>sp|P00698|LYSC_CHICK Lysozyme C OS=Gallus gallus GN=LYZ PE=1 SV=1	collision-induced dissociation	00527771buch_ab4liz2_s.5400.5400.2	controllerType=0 controllerNumber=1 scan=5400	30.7131
										b+		AA		y+
										187.087	1	W	7
										373.166	2	W	6	912.352
										638.228	3	C	5	726.272
										752.271	4	N	4	461.21
										867.298	5	D	3	347.167
										924.319	6	G	2	232.14
											7	R	1	175.119
										pI: 5.83
										composition: C(41) H(51) N(13) O(10) S(1)
										neutral mass: 1097.423640
										+ 1 charge: 1098.430917
											di-hexose
											hexosyl transfer				Amadori	triose loss					Amadori	triose loss					pentose loss
		MODEL D	PID 1189		y+	y+		± 0.500 Da		y+	y+		± 0.500 Da		y+	y+		± 0.500 Da		90.0317	y+	y+		± 0.500 Da	150.053	y+	y+		± 0.500 Da		H20 loss	144 gain y+	144 gain y+		± 0.500 Da	2 H20 loss	126 gainy+	126 gain y+		± 0.500 Da	3 H20 loss	108 gains y+	108 gains y+		± 0.500 Da
		score 192.2	AA		calc.	obs.	int.	err.		162 gain	162 gain	int.	err.		42 gain	42 gain	int.	err.		162-90	72 gain	72 gain	int.	err.	pentose loss	12 gain	12 gain	int.	err.			cal.	obs.	int.	err.		cal.	obs.	int	err.		cal.	obs.	int	err.
		scan time:	W	7				0		calc.	obs.			tetrose loss	calc.	obs.				triose loss	calc.	obs.				calc.	obs.				18.0106	1056.39	NA			36.0211	1038.38	NA			54.0317	1020.37	NA
		29.9908	W	6	912.352	912.427	117400	0.075696	162.053	1074.4	NA			120.042	954.362	not obs.				72.0211	984.373	not obs.			12	924.352	not obs.				18.0106	870.315	870.072	633.2	-0.242146	36.0211	852.304	not obs.			54.0317	834.293	834.552	1001	0.258984
		z +2	C	5	726.272	726.304	1717000	0.031309	162.053	888.325	888.444	1506	0.118789	120.042	768.283	768.355	8557	0.071749		72.0211	798.293	not obs.			12	738.272	738.689	6137	0.417009		18.0106	605.253	605.539	1902	0.286859	36.0211	587.242	not obs.			54.0317	569.231	not obs.
			N	4	461.21	461.259	322500	0.048914	162.053	623.263	not obs.			120.042	503.221	503.138	3849	-0.082746		72.0211	533.231	not obs.			12	473.21	473.516	20600	0.305314		18.0106	491.21	490.788	23630	-0.421114	36.0211	473.199	473.516	20600	0.316551	54.0317	455.188	not obs.
			D	3	347.167	347.303	76530	0.136041	162.053	509.22	509.205	3247	-0.015179	120.042	389.178	389.256	3015	0.077981		72.0211	419.188	not obs.			12	359.167	359.372	4398	0.204241		18.0106	376.183	376.444	13870	0.261329	36.0211	358.172	358.112	939.7	-0.059806	54.0317	340.162	not obs.
			G	2	232.14	232.158	354400	0.017584	162.053	394.193	393.816	20430	-0.377536	120.042	274.151	274.186	4779	0.034624		72.0211	304.162	not obs.			12	244.14	244.046	3588	-0.094016		18.0106	319.161	not obs.			36.0211	301.151	301.357	8310	0.206158	54.0317	283.14	283.26	5103	0.119423
			R	1	175.119	175.132	4880	0.012748	162.053	337.172	337.242	932.8	0.070428	120.042	217.13	not obs.				72.0211	247.14	not obs.			12	187.119	not obs.
							2592710					21362.8					20200						0					28586						40035.2					29849.7					6104
												1					0.945569											1.33812						1.87406					29849.7		54.0317	108.063		6104
									162.053
									324.106
											di-hexose			tetrose loss						triose loss					triose + pentose loss					2 trioses loss					2 pentoses loss					3 H@O loss
											hexosyl transfer				Amadori	triose loss					Amadori	triose loss					pentose loss					pentose loss					pentose loss
y		MODEL D	PID 1189		y+	y+		± 0.500 Da		y+	y+		± 0.500 Da		y+	y+		± 0.500 Da		90.0317	y+	y+		± 0.500 Da	150.053	y+	y+		± 0.500 Da	180.063	y+	y+		± 0.500 Da	300.106	y+	y+		± 0.500 Da		y+	y+		± 0.500 Da
		score 192.2	AA		calc.	obs.	int.	err.		324 gain	324 gain	int.	err.		42 gain	42 gain	int.	err.		324-90		72 gain	int.	err.	pentose loss		12 gain	int.	err.	pentose loss			int.	err.	pentose loss			int.	err.				int.	err.
		scan time:	W	7				0	324.106	calc.	obs.			tetrose loss	calc.	obs.				triose loss	calc.	obs.				calc.	obs.				calc.	obs.				calc.	obs.				calc.	obs.
		29.9908	W	6	912.352	912.427	117400	0.075696	324.106	1236.46	NA			120.042	1116.41	NA				90.0317	1146.43	NA			240.085	996.373	not obs.			180.063	1056.39	1056.39		0	300.106	936.352	936.496	182500	0.144904	54.0317	1182.43	1182.43
		z +2	C	5	726.272	726.304	1717000	0.031309	324.106	1050.38	NA			120.042	930.336	not obs.				90.0317	960.346	960.631	1362	0.284664	240.085	810.293	not obs.			180.063	870.315	870.072	633.2	-0.242141	300.106	750.272	750.363	115300	0.090617	54.0317	996.346	not obs.		#VALUE!
			N	4	461.21	461.259	322500	0.048914	324.106	785.316	not obs.			120.042	665.274	665.471	14880	0.197234		90.0317	695.284	not obs.			240.085	545.231	not obs.			180.063	605.253	605.539	1902	0.286864	300.106	485.21	485.449	996.9	0.238722	54.0317	731.284	731.284		0
			D	3	347.167	347.303	76530	0.136041	324.106	671.273	671.167	5609	-0.106099	120.042	551.231	not obs.				90.0317	581.241	not obs.			240.085	431.188	431.304	781.5	0.11512	180.063	491.21	490.788	23630	-0.421109	300.106	371.167	not ob.			54.0317	617.241	617.241		0
			G	2	232.14	232.158	354400	0.017584	324.106	556.246	not obs.			120.042	436.204	not obs.				90.0317	466.214	not obs.			240.085	316.162	not obs.			180.063	376.183	376.444	13870	0.261334	300.106	256.14	256.241	924.4	0.100292	54.0317	502.214	502.245	16310	0.030939
			R	1	175.119	175.132	4880	0.012748	324.106	499.225	499.365	35800	0.140508	120.042	379.182	379.198	28840	0.015968		90.0317	409.193	409.42	12540	0.227303	240.085	259.14	259.269	865.7	0.129227	180.063	319.161	not obs.			300.106	199.119	199.441	7155	0.321756	54.0317	445.193	not obs.
							2592710					35800					43720						13902					1647.2					39402					9076.3					16310
												1					1.22123											0.0460112					0.901235					#DIV/0!
																				90.0317
																				90.0317					240.085
																				180.063	180.063														150.053
																																			150.053
																																			300.106
									Glucopyrasonyl ring					Fructopyranosyl
															Amadori	triose loss					pentose loss
		MODEL D	PID 1189		y+	y+		± 0.500 Da	tetrose	y+	y+		± 0.500 Da	triose	y+	y+		± 0.500 Da	pentose	y+	y+		± 0.500 Da
		score 192.2	AA		calc.	obs.	int.	err.	loss	120 loss	120 loss	int.	err.	loss	90 loss	90 loss	int.	err.	loss	150 loss	150 loss	int.	err.						H20 loss	H2o loss	H2O loss y+		± 0.500 Da	2 H20 loss	2 H20 loss	126 gain y+		± 0.500 Da	3 H20 loss	3H20 loss	3H20 loss		± 0.500 Da
		scan time:	W	7				0		calc.	obs.			triose loss	calc.	obs.				calc.	obs.									cal. Y+	obs.	int.	err.		cal. Y+	obs.	int	err.		cal. Y+	obs. Y+	int	err.
		29.9908	W	6	912.352	912.427	117400	0.075696	120.042	792.309	792.145	5764	-0.164544	90.0317	822.32	822.457	4946	0.137091	150.053	762.299	762.5	3273	0.20082						18.0106	894.341	not obs.			36.0211	876.33	not obs.			54.0317	858.32	858.537	7527	0.216691
		z +2	C	5	726.272	726.304	1717000	0.031309	120.042	606.23	606.33	6161	0.099469	90.0317	636.241	636.241	not obs.		150.053	576.219	not obs.								18.0106	708.262	708.406	10070	0.144474	36.0211	690.251	not obs.			54.0317	672.241	672.62	16840	0.379304	(0.2 A)	y+	y+		± 0.500 Da
						transfer and follow-ups					42 gain				72 gain	72 gain				12 gain				24 gain			± 0.500 Da															24367		72-18	54 gain	54 gain	int.	err.
																								calc	obs	int.	err.																		calc.	obs.
			N	4	461.21	461.259	322500	0.048914	42.0106	503.221				90.0317										485.21	485.449	996.9	0.238714																	54.0106	515.221	514.811	56200	-0.410046
			D	3	347.167	347.303	76530	0.136041	42.0106	389.178	503.138	3849	-0.082746	90.0317										371.167	not obs.																			54.0106	401.178	not obs.
			G	2	232.14	232.158	354400	0.017584	42.0106	274.151	389.256	3015	0.077981	90.0317										256.14	256.241	924.4	0.100284																	54.0106	286.151	not obs.
			R	1	175.119	175.132	4880	0.012748	42.0106	217.13	274.186	4779	0.034624	90.0317										199.119	199.441	7155	0.321748																	54.0106	229.13	229.164	837.9	0.034688
							2592710					7794					0					0				9076.3					pentose loss																57037.9
												7794														9076.3				y+	y+		± 0.500 Da														2.31769
																															24 gain	int.	err.
																										849.418	7603
														Amadori					Amadori					Amadori product's fructopyranosyl ring dehydratation
		MODEL D	PID 1189		b+	b+	int.	± 0.500 Da	tetrose loss	120 loss b+	120 loss b+	int.	± 0.500 Da	triose loss	90 loss b+	90 loss b+	int.	± 0.500 Da	pentose loss	150 loss b+	150 loss b+	int.	± 0.500 Da	H20 loss	18 loss b+	18 loss b+		± 0.500 Da	2 H20 loss	36 loss b+	36 loss b+		± 0.500 Da	3 H20 loss	54 loss b+	54 loss b+		± 0.500 Da	3H2O+CH2O	84 loss b+	84 loss b+		± 0.500 Da
		score 192.2	AA		calc.	obs. b+		err.		calc.	obs.		err.	90 loss	calc.	obs.		err.	150 loss	calc.	obs.		err.		cal.	obs.	int.	err.		cal.	obs.	int	err.		cal.	obs.	int	err.	loss	cal.	obs.	int	err.
		scan time:	W	1	187.087	187.205	3764	0.118411	120.042	67.0443	NA			90.0317	97.0549	NA			150.053	37.0338	NA			18.0106	169.076	NA			36.0211	151.065	NA			54.0317	133.055	NA			84.0423	103.044	NA
Tab done		29.9908	W	2	373.166	373.23	883400	0.063698	120.042	253.124	NA			90.0317	283.134	283.26	5103	0.125293	150.053	223.113	NA			18.0106	355.155	NA			36.0211	337.145	337.242	932.8	0.097428	54.0317	319.134	NA			84.0423	289.124	not obs.
		z +2	C	3	638.228	638.229	99030	0.000993	120.042	518.186	518.242	7662	0.056153	90.0317	548.196	547.952	1285	-0.244512	150.053	488.175	not obs.			18.0106	620.217	619.725	6571	-0.491942	36.0211	602.207	602.274	2303	0.067123	54.0317	584.196	not obs.			84.0423	554.186	not obs.
			N	4	752.271	752.5	19390	0.228866	120.042	632.229	not obs.			90.0317	662.239	662.374	7612	0.135161	150.053	602.218	602.274	2303	0.05589	18.0106	734.26	734.356	2753	0.095831	36.0211	716.25	not obs.			54.0317	698.239	698.269	1222	0.029861	84.0423	668.229	not obs.
			D	5	867.298	867.423	137300	0.125123	120.042	747.256	747.25	5826	-0.005617	90.0317	777.266	777.492	3675	0.225818	150.053	717.245	717.616	1598	0.371447	18.0106	849.287			0.130288	36.0211	831.277	831.319	16910	0.041953	54.0317	813.266	813.447	1393	0.180518	84.0423	783.256	not obs.
			G	6	924.319	not obs.			120.042	804.277	not obs.			90.0317	834.288	834.552	1001	0.264854	150.053	774.266	774.48	2303	0.213483	18.0106	906.309	not obs.			36.0211	888.298	888.444	1506	0.145789	54.0317	870.288	870.072	633.2	-0.215146	84.0423	840.277	not obs.
			R	7					120.042					90.0317
							1139120					5826					13573					6204					9324					21651.8					3248.2
							1					0.00511447					0.0119153					0.00544631			b5-18		0.00818527					0.0190075					0.0028515
																			Amadori
		MODEL D	PID 1189		b+	b+	int.	± 0.500 Da	hexosyl	b+162	b+162	int.	± 0.500 Da	tetrose loss	42 gain b+	42 gain b+	int.	± 0.500 Da	triose loss	72 gain b+	72 gain b+	int.	± 0.500 Da	pentose loss	12 gain b+	12 gain b+	int.	± 0.500 Da	H20 loss	144 gain b+	144 gain b+		± 0.500 Da	2 H20 loss	126 gain b+	126 gain b+		± 0.500 Da	3 H20 loss	108 gains b+	108 gains b+		± 0.500 Da		78 gains b+	108 gains b+		± 0.500 Da
		score 192.2	AA		calc.	obs. b+		err.	transfer	calc.			err.	120 loss	calc.	obs.		err.	90 loss	calc.	obs.		err.	150 loss	calc.	obs.		err.		cal.	obs.	int.	err.		cal.	obs.	int	err.		cal.	obs.	int	err.		cal.	obs.	int	err.
		scan time:	W	1	187.087	187.205	3764	0.118411	162.053	349.139	not obs.			120.042	229.097	229.164	837.9	0.067051	90.0317	259.108	259.269	865.9	0.161686	150.053	199.087	199.441	7155	0.354115	18.0106	331.129	not obs.			36.0211	313.118	313.258	1277	0.139421	54.0317	295.108	not obs.			78.0106	265.097	265.241	924.4	0.143511
		29.9908	W	2	373.166	373.23	883400	0.063698	162.053	535.219	not obs.			120.042	415.176	not obs.			90.0317	445.187	not obs.			150.053	385.166	385.382	1102	0.216502	18.0106	517.208	517.208	10460	-5.7e-05	36.0211	499.198	499.365	35800	0.167508	54.0317	481.187	480.937	544440	-0.250027	78.0106	451.177	451.516	188100	0.339698
		z +2	C	3	638.228	638.229	99030	0.000993	162.053	800.281	not obs.			120.042	680.238	680.004	1668	-0.234267	90.0317	710.249	710.336	3533	0.087368	150.053	650.228	not obs.			18.0106	782.27	not obs.			36.0211	764.26	not obs.			54.0317	746.249	not obs.			78.0106	716.239	not obs.
			N	4	752.271	752.5	19390	0.228866	162.053	914.324	914.725	1911	0.401346	120.042	794.281	not obs.			90.0317	824.292	not obs.			150.053	764.271	not obs.			18.0106	896.313	not obs.			36.0211	878.303	not obs.			54.0317	860.292	not obs.			78.0106	830.281	not obs.
			D	5	867.298	867.423	137300	0.125123	162.053	1029.35	NA			120.042	909.308	not obs.			90.0317	939.319	not obs.			150.053	879.298	879.539	2254	0.241327	18.0106	1011.34	not obs.			36.0211	993.329	not obs.			54.0317	975.319	not obs.			78.0106	945.308	not obs.
			G	6	924.319	not obs.			162.053	1086.37	NA			120.042	966.33	not obs.			90.0317	996.34	not obs.			150.053	936.319	936.496	182500	0.177263	18.0106	1068.36	not obs.			36.0211	1050.35	not obs.			54.0317	1032.34	not obs.			78.0106	1002.33	not obs.
			R	7				0
												1911					2505.9					4398.9					193011					10460					37077					544440					189024
												1					1.3113					2.30188					101					5.47357					19.4019					284.898					98.9139
									324.106	162.053
										120.042																			9.00528
										42.0106
						double transfer onto W
																			2 trioses loss						triose and pentose loss				2 pentoses loss
																								triose &
		MODEL D	PID 1189		b+	b+	int.	± 0.500 Da	hexosyl	b+324	b+324	int.	± 0.500 Da	tetrose loss	42 gain b+	42 gain b+	int.	± 0.500 Da	2trioses loss	72 gain b+	72 gain b+	int.	± 0.500 Da	pentose loss	12 gain b+	12 gain b+	int.	± 0.500 Da	300 loss	24 gain b+	24 gain b+		± 0.500 Da	2 H20 loss	126 gain b+	126 gain b+		± 0.500 Da	3 H20 loss	108 gains b+	108 gains b+		± 0.500 Da		78 gains b+	108 gains b+		± 0.500 Da
		score 192.2	AA		calc.	obs. b+		err.	transfer	calc.			err.	120 loss	calc.	obs.		err.	180 loss	calc.	obs.		err.	150 loss	calc.	obs.		err.		cal.	obs.	int.	err.		cal.	obs.	int	err.		cal.	obs.	int	err.		cal.	obs.	int	err.
b		scan time:	W	1	187.087	187.205	3764	0.118411	324.106	511.192	510.75	4163	-0.442229	120.042	391.15	not obs.			180.063	331.129	not obs.			240.085	271.108	271.408	4638	0.30069	300.106	211.087	not obs.			36.0211	475.171	313.258	1277	-161.913	54.0317	457.161	not obs.			78.0106	265.097	265.241	924.4	0.143511
		29.9908	W	2	373.166	373.23	883400	0.063698	324.106	697.272	697.238	1008	-0.033242	120.042	577.229			-577.229	180.063	517.208	517.208	10460	-5.2e-05	240.085	457.187	457.277	11140	0.090277	300.106	397.166	397.319	18700	0.153206	36.0211	661.25	499.365	35800	-161.885	54.0317	643.24	480.937	544440	-162.303	78.0106	451.177	451.516	188100	0.339698
		z +2	C	3	638.228	638.229	99030	0.000993	324.106	962.334	not obs.			120.042	842.291	842.523	9800	0.231313	180.063	782.27	not obs.			240.085	722.249	not obs.			300.106	662.228	662.374	7612	0.146401	36.0211	926.312	not obs.			54.0317	908.302	not obs.			78.0106	716.239	not obs.
			N	4	752.271	752.5	19390	0.228866	324.106	1076.38	NA			120.042	956.334	not obs.			180.063	896.313	not obs.			240.085	836.292	not obs.			300.106	776.271	776.491	5480	0.219974	36.0211	1040.36	not obs.			54.0317	1022.34	not obs.			78.0106	830.281	not obs.
			D	5	867.298	867.423	137300	0.125123	324.106	1191.4	NA			120.042	1071.36			-1071.36	180.063	1011.34	1011.34		0	240.085	951.319	951.525	10190	0.206402	300.106	891.298	891.595	1253	0.297431	36.0211	1155.38	not obs.			54.0317	1137.37	not obs.			78.0106	945.308	not obs.
			G	6	924.319	not obs.			324.106	1248.42	NA			120.042	1128.38			-1128.38	180.063	1068.36	1068.36		0	240.085	1008.34	not obs			300.106	948.319	not obs.			36.0211	1212.4	not obs.			54.0317	1194.39	not obs.			78.0106	1002.33	not obs.
			R	7				0
												5171					9800					10460					25968					33045					37077					544440					189024
												1					1.89518					2.02282					5.02185					6.39045					7.17018					105.287					36.5547
																			90.0317		90.0317								150.053
																			180.063		150.053								300.106
									triple-hexosylation
		MODEL D	PID 1189		b+	b+	int.	± 0.500 Da	hexosyl	b+486	b+324	int.	± 0.500 Da		2 pentoses
		score 192.2	AA		calc.	obs. b+		err.	transfer	calc.			err.		loss	obs	int
		scan time:	W	1	187.087	187.205	3764	0.118411	486.158	673.245	not obs.			300.106	373.139	373.139	b2
		29.9908	W	2	373.166	373.23	883400	0.063698	486.158	859.324	not obs.			300.106	559.219	559.219
		z +2	C	3	638.228	638.229	99030	0.000993	486.158	1124.39	NA			300.106	824.281	824.281
			N	4	752.271	752.5	19390	0.228866	486.158	1238.43	NA			300.106	938.324	938.279	7220	-0.044246
			D	5	867.298	867.423	137300	0.125123	486.158	1353.46	NA			300.106	1053.35	1053.35
			G	6	924.319	not obs.			486.158	1410.48	NA			300.106	1110.37	1110.37
			R	7				0						300.106	-300.106	-300.106
												0									240.085
												1
					calc.	obs.	int.	± 0.500 Da
		204 NL	from MH		894.356	not obs.
		204 NL	from precursor ion		447.682	447.594	3760	-0.0876797	Glycosyl trensfer followed by C-terminal ornitine formation [162.0528 + 42.0218 = 204.0746]										HN=C=NH	42.0218
		180 NL	from MH		918.368	not obs.			hexose loss											42.0218
		180 NL	from precursor ion		459.687	not obs.
		162 NL	from MH		936.378	936.497	182500	0.118413	hexosyl loss
		162 NL	from precursor ion		468.693	468.861	6396000	0.167809										162.053
		150 NL	from precursor ion		474.693	474.502	16100	-0.191179	Amadori ???	pentose								42.0218		ornityne formation		loss
		120 NL	from precursor ion		489.698	489.82	428800	0.121839	tetrose									204.075
		90 NL	from precursor ion		504.703	504.476	14370	-0.227443	Amadori	triose
					?	460.346	3224000
											hexosyl transfer				Amadori	triose loss				Amadori	pentose loss																												Amadori
		MODEL D	PID 1210		y+	y+		± 0.500 Da		y+	y+		± 0.500 Da		y+	y+		± 0.500 Da		y+	y+		± 0.500 Da			PID 1210			y+	y+		± 0.500 Da		y+	y+		± 0.500 Da	(0.2 A)	y+	y+		± 0.500 Da	(0.2 A)	y+	y+		± 0.500 Da		y+
		score 186.8	AA		calc.	obs.	int.	err.		162 gain	162 gain	int.	err.		72 gain	72 gain	int.	err.		12 gain	12 gain	int.	err.			AA			calc.	obs.	int.	err.		162 gain	162 gain	int.	err.	120	42 gain	42 gain	int.	err.	42-18	24 gain	24 gain	int.	err.		72 gain
		scan time:	W	7						calc.	obs.			triose loss	calc.	obs.				calc.	obs.					W	7	11						calc.	obs.			tetrose loss	calc.	obs.				calc.	obs.			triose loss	calc.
		30.0904	W	6	912.352	912.45	414500	0.098796	162.053	1074.4	NA			72.0211	984.373	not obs.			12	924.352	not obs.					W	6																					72.0211	984.373
		z +2	C	5	726.272	726.362	5466000	0.089309	162.053	888.325	888.707	10920	0.382189	72.0211	798.293	798.33	3601	0.036684	12	738.272	not obs.					C	5																					72.0211	798.293
			N	4	461.21	461.277	1838000	0.0669324	162.053	623.263	not obs.			72.0211	533.231	not obs.			12	473.21	473.42	31170	0.210014			N	4																					72.0211	533.231
			D	3	347.167	347.35	176200	0.182441	162.053	509.22	509.328	37140	0.108221	72.0211	419.188	not obs.			12	359.167	359.179	17180	0.011941			D	3																					72.0211	419.188
			G	2	232.14	232.179	1137000	0.0387954	162.053	394.193	not obs.			72.0211	304.162	not obs.			12	244.14	244.286	15270	0.145884			G	2																					72.0211	304.162
			R	1	175.119	175.243	56480	0.123648	162.053	337.172	not obs.			72.0211	247.14	247.395	45920	0.255323	12	187.119	not obs.					R	1																					72.0211	247.14
							9088180					48060					49521					63620
									0
											di-hexose			tetrose loss						triose loss					triose + pentose loss					2 trioses loss					2 pentoses loss
											hexosyl transfer				Amadori	triose loss					Amadori	triose loss					pentose loss					pentose loss					pentose loss
		MODEL D	PID 1210		y+	y+		± 0.500 Da		y+	y+		± 0.500 Da		y+	y+		± 0.500 Da		90.0317	y+	y+		± 0.500 Da	150.053	y+	y+		± 0.500 Da	180.063	y+	y+		± 0.500 Da	300.106	y+	y+		± 0.500 Da
		score 186.8	AA		calc.	obs.	int.	err.		324 gain	324 gain	int.	err.		42 gain	42 gain	int.	err.		324-90		72 gain	int.	err.	pentose loss		12 gain	int.	err.	pentose loss			int.	err.	pentose loss			int.	err.
		scan time:	W	7					324.106	calc.	obs.			tetrose loss	calc.	obs.				triose loss	calc.	obs.				calc.	obs.				calc.	obs.				calc.	obs.
		30.0904	W	6	912.352	912.45	414500	0.098796	324.106	1236.46	NA			120.042	1116.41	NA				90.0317	1146.43	NA			240.085	996.373	not obs.			180.063	1056.39	NA			300.106	936.352	936.509	510800	0.157604
		z +2	C	5	726.272	726.362	5466000	0.089309	324.106	1050.38	NA			120.042	930.336	not obs.				90.0317	960.346	960.715	11270	0.368564	240.085	810.293	810.29	4830	-0.003812	180.063	870.315	870.707	4503	0.392359	300.106	750.272	750.385	409200	0.112617
			N	4	461.21	461.277	1838000	0.0669324	324.106	785.316	not obs.			120.042	665.274	not obs.				90.0317	695.284	695.472	6164	0.188169	240.085	545.231	not obs.			180.063	605.253	not obs.			300.106	485.21	not obs.
			D	3	347.167	347.35	176200	0.182441	324.106	671.273	671.369	5138	0.096401	120.042	551.231	not obs.				90.0317	581.241	not obs.			240.085	431.188	not obs.			180.063	491.21	491.435	14040	0.225191	300.106	371.167	371.453	112500	0.286049
			G	2	232.14	232.179	1137000	0.0387954	324.106	556.246	556.457	8138	0.210944	120.042	436.204	436.304	4101	0.100004		90.0317	466.214	not obs.			240.085	316.162	not obs.			180.063	376.183	not obs.			300.106	256.14	256.155	10240	0.014292
			R	1	175.119	175.243	56480	0.123648	324.106	499.225	499.222	119200	-0.002592	120.042	379.182	379.216	10170	0.033768		90.0317	409.193	not obs.			240.085	259.14	259.319	21470	0.178827	180.063	319.161	not obs.			300.106	199.119	199.106	75780	-0.012944
							9088180					127338					14271						17434					21470					14040					198520
												1					0.112072						0.136911					0.168606					0.983813					1.559
																				90.0317
																																																	240.085
																																		double transfer onto W
																																											2 trioses loss						triose and pentose loss
									Amadori											hexosyl transfer	di-hexosyl
		MODEL D	PID 1210		b+	b+	int.	± 0.500 Da	triose loss	90 loss b+	90 loss b+	int.	± 0.500 Da	tetrose loss	120 loss b+	120 loss b+	int.	± 0.500 Da	hexosyl	b+162	b+162	int.	± 0.500 Da			MODEL D	PID 1210		b+	b+	int.	± 0.500 Da	hexosyl	b+324	b+324	int.	± 0.500 Da	tetrose loss	42 gain b+	42 gain b+	int.	± 0.500 Da	2trioses loss	72 gain b+	72 gain b+	int.	± 0.500 Da	pentose loss	12 gain b+
		score 186.8	AA		calc.	obs. b+		err.	90 loss	calc.	obs.		err.		calc.	obs.		err.	transfer	calc.			err.			score 186.8	AA		calc.	obs. b+		err.	transfer	calc.			err.	120 loss	calc.	obs.		err.	180 loss	calc.	obs.		err.	150 loss	calc.
		scan time:	W	1	187.087	187.148	3477	0.061811	90.0317	97.0549	NA			120.042	67.0443	NA			162.053	349.139	349.245	2042	0.105091		b	scan time:	W	1	187.087	187.148	3477	0.061811	324.106	511.192	not obs.			120.042	391.15	not obs.			180.063	331.129	not obs.			240.085	271.108
		30.0904	W	2	373.166	373.268	2821000	0.102498	90.0317	283.134	283.283	17590	0.148893	120.042	253.124	not obs.			162.053	535.219	not obs.					30.0904	W	2	373.166	373.268	2821000	0.102498	324.106	697.272	not obs.			121.042	576.229	not obs.			181.063	516.208	516.081	56900	-0.127652	240.085	457.187
		z +2	C	3	638.228	638.267	325600	0.038793	90.0317	548.196	548.146	15280	-0.050212	120.042	518.186	518.402	63650	0.216053	162.053	800.281	not obs.					z +2	C	3	638.228	638.267	325600	0.038793	324.106	962.334	not obs.			122.042	840.291	840.642	14160	0.350913	182.063	780.27	not obs.			240.085	722.249
			N	4	752.271	752.381	46770	0.110666	90.0317	662.239	not obs.			120.042	632.229	not obs.			162.053	914.324	914.535	27900	0.211246				N	4	752.271	752.381	46770	0.110666	324.106	1076.38	NA			123.042	953.334	953.548	220100	0.213786	183.063	893.313	not obs.			240.085	836.292
			D	5	867.298	867.465	377700	0.167023	90.0317	777.266	not obs.			120.042	747.256	not obs.			162.053	1029.35	NA						D	5	867.298	867.465	377700	0.167023	324.106	1191.4	NA			124.042	1067.36	NA			184.063	1007.34	NA			240.085	951.319
			G	6	924.319	924.449	3763	0.129859	90.0317	834.288	834.391	30750	0.103854	120.042	804.277	not obs.			162.053	1086.37	NA						G	6	924.319	924.449	3763	0.129859	324.106	1248.42	NA			125.042	1123.38	NA			185.063	1063.36	NA			240.085	1008.34
			R	7					90.0317				0	120.042				0	162.053								R	7
							3578310					63620					63650					29942									3578310					0					234260					56900
																																				1					#DIV/0!					#DIV/0!
					calc.	obs.	int.	± 0.500 Da											162.053
		204 NL	from MH		894.356	894.594	15830	0.237617											42.0218									486.158
		204 NL	from precursor ion		447.682	447.806	27990	0.12402											204.075
		180 NL	from MH		918.368	not obs.			hexose loss
		180 NL	from precursor ion		459.687	not obs.
		162 NL	from MH		936.378	936.509	510800	0.131095	hexosyl loss
		162 NL	from precursor ion		468.693	468.913	17850000	0.220209				a5 calc	± 0.500 Da
		150 NL	from precursor ion		474.693	474.594	44630	-0.0981787	Amadori ???	pentose	or a 5	530.272	-55.6777
		120 NL	from precursor ion		489.698	489.895	1204000	0.196739	tetrose
		90 NL	from precursor ion		504.703	not obs.			Amadori	triose
											hexosyl transfer				Amadori	triose loss					pentose loss
		MODEL D	PID 1256		y+	y+		± 0.500 Da		y+	y+		± 0.500 Da		y+	y+		± 0.500 Da		y+	y+		± 0.500 Da
		score 185.5	AA		calc.	obs.	int.	err.		162 gain	162 gain	int.	err.		72 gain	72 gain	int.	err.		12 gain	12 gain	int.	err.
		scan time:	W	7						calc.	obs.			triose loss	calc.	obs.				calc.	obs.
		30.7131	W	6	912.352	912.522	50360	0.170696	162.053	1074.4	not obs.			72.0211	984.373	not obs.			12	924.352	not obs.
		z +2	C	5	726.272	726.341	905200	0.068809	162.053	888.325	not obs.			72.0211	798.293	not obs.			12	738.272	738.762	8855	0.490009
			N	4	461.21	461.259	188700	0.049014	162.053	623.263	623.087	2115	-0.176106	72.0211	533.231	not obs.			12	473.21	473.595	2445	0.384614
			D	3	347.167	347.296	25810	0.128741	162.053	509.22	508.831	40970	-0.388779	72.0211	419.188	not obs.			12	359.167	not obs.
			G	2	232.14	232.145	196900	0.004584	162.053	394.193	not obs.			72.0211	304.162	not obs.			12	244.14	244.343	4456	0.202884
			R	1	175.119	175.215	8417	0.095948	162.053	337.172	not obs.			72.0211	247.14	not obs.			12	187.119	not obs.
							1375387					43085					0					15756
									Amadori											hexosyl transfer	di-hexosyl
		MODEL D	PID 1256		b+	b+	int.	± 0.500 Da	triose loss	90 loss b+	90 loss b+	int.	± 0.500 Da	tetrose loss	120 loss b+	120 loss b+	int.	± 0.500 Da	hexosyl	b+162	b+162	int.	± 0.500 Da
		score 185.5	AA		calc.	obs. b+		err.	90 loss	calc.	obs.		err.		calc.	obs.		err.	transfer	calc.			err.
		scan time:	W	1	187.087	187.179	1953	0.092611	90.0317	97.0549	NA			120.042	67.0443	NA			162.053	349.139	349.271	2040	0.131391
		30.7131	W	2	373.166	373.271	520500	0.104598	90.0317	283.134	282.826	1881	-0.308107	120.042	253.124	253.212	1059	0.088458	162.053	535.219	not obs.
		z +2	C	3	638.228	638.283	30390	0.055493	90.0317	548.196	not obs.			120.042	518.186	517.837	4095	-0.348747	162.053	800.281	not obs.
			N	4	752.271	752.333	5859	0.062366	90.0317	662.239	662.073	7052	-0.166539	120.042	632.229	not obs.			162.053	914.324	914.816	4800	0.492046
			D	5	867.298	867.551	74470	0.253223	90.0317	777.266	777.747	1013	0.480818	120.042	747.256	747.523	2851	0.266983	162.053	1029.35	1029.3	1027	-0.049297
			G	6	924.319	not obs.			90.0317	834.288	not obs.			120.042	804.277	not obs.			162.053	1086.37	NA
			R	7					90.0317					120.042					162.053
							631219					9946					8005					5827
					calc.	obs.	int.	± 0.500 Da
		204 NL	from MH		894.356	894.347	1224	-0.00948347
		204 NL	from precursor ion		447.682	447.985	4634	0.30332
		180 NL	from MH		918.368	918.463	33790	0.0950745	hexose loss
		180 NL	from precursor ion		459.687	not obs.		0.624399		460.312	2025000
		162 NL	from MH		936.378	936.501	139700	0.122595	hexosyl loss
		162 NL	from precursor ion		468.693	468.876	5575000	0.183709				a5 calc	± 0.500 Da
		150 NL	from precursor ion		474.693	474.742	16680	0.0491213	Amadori ???	pentose	or a 5	530.272	-55.5304
		120 NL	from precursor ion		489.698	489.82	399200	0.121939	tetrose
		90 NL	from precursor ion		504.703	505.017	24150	0.313757	Amadori	triose
[truncated: 29 more columns]

## Sheet: SLGNWVC+162AAK
PID	Pos.	Sequence	Glycans	Mods (variable)	PEP	Score	z	Obs. m/z	Calc. m/z	Obs. MH	Calc. MH	ppm err.	Off- By-X	Cleavage	Delta Score	Delta Mod. Score	Protein Name	Fragment Type	Comment	Scan #	Scan Time	Glycans Pos.	Obs.M	Calc.M
1684	42	Y.SLGNWVC[+162.05282]AAK.F		C7(Hex / 162.0528)	4.89e-07	377.6	2	605.789	605.792	1210.57	1210.58	-5.66278		NRagged	377.564	377.564	>sp|P00698|LYSC_CHICK Lysozyme C OS=Gallus gallus GN=LYZ PE=1 SV=1	collision-induced dissociation	00527771buch_ab4liz2_s.6821.6821.2	controllerType=0 controllerNumber=1 scan=6821	35.4948		1209.56	1209.57
https://proteomicsresource.washington.edu/cgi-bin/fragment.cgi
				b+		AA		y+																																	1
				88.0393	1	S	10																																		2
				201.123	2	L	9	1123.55																																	3
				258.145	3	G	8	1010.46																																	4
				372.188	4	N	7	953.44																																	5
				558.267	5	W	6	839.397																																	6
				657.335	6	V	5	653.317																																	7
				922.397	7	C	4	554.249																																	8
				993.435	8	A	3	289.187																																	9
				1064.47	9	A	2	218.15																																	10
					10	K	1	147.113
				pI: 7.94
				composition: C(46) H(71) N(13) O(12) S(1)
				neutral mass: 1209.569970
				+ 1 charge: 1210.577247
																																	150	A						120
									HEXOSYL TRANSFER				Amadori		Amadori													150					120							90	A
	MODEL D	PID 1684		b+	b+	int.	± 0.500 Da	hexosyl	b+162	b+162	int.	± 0.500 Da	triose loss	90 loss b+	90 loss b+	int.	± 0.500 Da	tetrose loss	120 loss b+	120 loss b+	int.	± 0.500 Da	pentose loss	150 loss b+	150 loss b+	int.	± 0.500 Da	150 loss b+	150 loss b+	int.	± 0.500 Da		270 loss					± 0.500 Da		210 loss
	score 377.6	AA		calc.	obs. b+		err.	transfer	calc.			err.	90 loss	calc.	obs.		err.		calc.	obs.		err.	or 12 gain	calc.	obs.		err.	calc.	obs.		err.				calc	obs.		err.		calc	obs.
	scan time:	S	1	88.0393	NA			162.053	250.092	not obs.			90.0317	160.06	160.088	114.3	0.02767	120.042	130.05	NA			12	100.039	NA
	35.4948	L	2	201.123	201.087	39570	-0.036069	162.053	363.176	363.461	6108	0.284411	90.0317	273.144	not obs.			120.042	243.134	243.392	568.3	0.257871	12	213.123	213.161	1039	0.037931	213.123	213.161	1039	0.037911	150.053
	z +2	G	3	258.145	258.304	5916	0.159567	162.053	420.198	420.429	168.5	0.231747	90.0317	330.166	not obs.			120.042	300.155	300.241	289.6	0.085807	12	270.145	270.107	97.23	-0.038033	270.145	270.107	97.23	-0.038053	150.053
		N	4	372.188	372.276	15560	0.08824	162.053	534.241	not obs.			90.0317	444.209	444.249	922.8	0.040515	120.042	414.198	414.514	729.4	0.31598	12	384.188	384.446	401.9	0.25794	384.188			-384.188	150.053
		W	5	558.267	558.176	30050	-0.091273	162.053	720.32	720.292	1882	-0.028393	90.0317	630.288			-630.288	120.042	600.278	not obs.			12	570.267	570.01	19370	-0.256673	570.267			-570.267	150.053
		V	6	657.335	657.379	19930	0.043813	162.053	819.388	819.511	69.53	0.123093	90.0317	729.357			-729.357	120.042	699.346	699.424	3903	0.078253	12	669.335	669.431	189.6	0.095213	669.336			-669.336	150.053
	HEXOSYL	C	7	922.397	922.517	1867	0.119708	162.053	1084.45	1084.7	1075	0.252588	90.0317	832.366	832.524	2202	0.158303	120.042	802.355	802.559	2731	0.203868	12	772.345	772.538	396.6	0.192808	934.398	934.696	1783	0.298388	150.053	270.095		814.355	814.456	5853	0.101188	210.074	874.376	not obs.
	carrying	A	8	993.435	993.576	12700	0.141295	162.053	1155.49	NA			90.0317	903.403	903.626	4128	0.22349	120.042	873.392	873.206	903.3	-0.186645	12	843.382	not obs.			1005.43	not obs.			150.053	270.095		885.392	885.511	5463	0.118875	210.074	945.413	945.59	345.2	0.17663
	b+ ions	A	9	1064.47	1064.57	7660	0.100581	162.053	1226.52	NA			90.0317	974.44	not obs.			120.042	944.429	944.438	282.5	0.008741	12	914.419	not obs.			1076.47	1076.83	190.4	0.359961	150.053	270.095		956.429	956.566	789	0.136561	210.074	1016.45	not obs.
		K	10																				12									120.042					12105
						133253			DIHEXOSE		9303.03					7252.8					7819.8					19956.2		DIHEXOSE					DIHEXOSE						DIHEXOSE
										hexosyl transfer				Amadori	triose loss					pentose loss
	MODEL D	PID 1684		y+	y+		± 0.500 Da		y+	y+		± 0.500 Da		y+	y+		± 0.500 Da		y+	y+		± 0.500 Da	tetrose	y+	y+		± 0.500 Da						120.042
	score 377.6	AA		calc.	obs.	int.	err.		162 gain	162 gain	int.	err.	A	72 gain	72 gain	int.	err.	A	12 gain	12 gain	int.	err.	loss	120 loss	120 loss	int.	err.						90.0317
	HEXOSYL	S	10						calc.	obs.			triose loss	calc.	obs.				calc.	obs.				calc	obs								210.074
	carrying	L	9	1123.55	not obs.			162.053	1285.6	NA			72.0211	1195.57	not obs.			12	1135.55	not obs.
	y + ions	G	8	1010.46	1010.55	107000	0.085246	162.053	1172.51	not obs.			72.0211	1082.48	1082.57	612.2	0.084021	12	1022.46	not obs.
		N	7	953.44	953.545	10330	0.105809	162.053	1115.49	not obs.			72.0211	1025.46	not obs.			12	965.44	965.88	283.1	0.440609
		W	6	839.397	839.482	35080	0.085437	162.053	1001.45	not obs.			72.0211	911.418	not obs.			12	851.397	851.231	435.7	-0.165863
		V	5	653.317	653.372	63650	0.05485	162.053	815.37	815.472	2223	0.10163	72.0211	725.339	not obs.			12	665.317	665.318	568.5	0.00015
		C	4	554.249	554.213	63170	-0.035936	162.053	716.302	716.652	3102	0.349844	72.0211	626.27	626.413	919.2	0.142439	12	566.249	566.651	8623	0.401964
		A	3	289.187	289.264	11280	0.076468	162.053	451.24	not obs.			72.0211	361.208	361.277	259.3	0.068643	12	301.187	301.301	1071	0.113668	120.042	331.198	331.29	695.1	0.092808
		A	2	218.15	218.084	8585	-0.065618	162.053	380.203	not obs.			72.0211	290.171	290.272	1545	0.101157	12	230.15	230.089	257.2	-0.060618	120.042	260.16	not obs.
		K	1	147.113	NA			162.053	309.166	309.175	1021	0.009076	72.0211	219.134	219.263	545.4	0.128771	12	159.113	159.1	490.2	-0.013004	120.042	189.123	189.156	173.9	0.032936
						299095					6346					1069.33	A				1818.4	A				869
																					1069.33
																					2887.73	A
								Amadori											hexosyl transfer	di-hexosyl
	MODEL D	PID 1684		b+	b+	int.	± 0.500 Da	triose loss	90 loss b+	90 loss b+	int.	± 0.500 Da	tetrose loss	120 loss b+	120 loss b+	int.	± 0.500 Da	hexosyl	b+162	b+162	int.	± 0.500 Da
	score 377.6	AA		calc.	obs. b+		err.	90 loss	calc.	obs.		err.		calc.	obs.		err.	transfer	calc.			err.
	scan time:	S	1	88.0393	NA			90.0317	-1.99239	NA			120.042	-32.003	NA			162.053	250.092	not obs.
	35.4948	L	2	201.123	201.087	39570	-0.036069	90.0317	111.092	NA			120.042	81.0811	NA			162.053	363.176	363.461	6108	0.284411
	z +2	G	3	258.145	258.304	5916	0.159567	90.0317	168.113	168.252	89.78	0.138962	120.042	138.103	NA			162.053	420.198	420.429	168.5	0.231747	y6++	420.202	0.22738
		N	4	372.188	372.276	15560	0.08824	90.0317	282.156	not obs.			120.042	252.146	not obs.			162.053	534.241	not obs.
		W	5	558.267	558.176	30050	-0.091273	90.0317	468.235	468.523	573.3	0.287622	120.042	438.225	438.659	549.1	0.433987	162.053	720.32	720.292	1882	-0.028393
		V	6	657.335	657.379	19930	0.043813	90.0317	567.304	567.359	7869	0.055108	120.042	537.293	536.987	1504	-0.306427	162.053	819.388	819.511	69.53	0.123093
		C	7	922.397	922.517	1867	0.119708	90.0317	832.366	832.524	2202	0.158303	120.042	802.355	802.559	2731	0.203868	162.053	1084.45
		A	8	993.435	993.576	12700	0.141295	90.0317	903.403	903.626	4128	0.22349	120.042	873.392	873.206	903.3	-0.186645	162.053	1155.49
		A	9	1064.47	1064.57	7660	0.100581	90.0317	974.44	not obs.			120.042	944.429	944.438	282.5	0.008741	162.053	1226.52
		K	10
						133253			ERROR		14862.1			ERROR		5969.9					8228.03
				calc.	obs.	int.	± 0.500 Da
	180 NL	from MH		1030.51	1030.6	294.8	0.0864545	hexose loss
	180 NL	from precursor ion		515.761	516.123	66770	0.362339
	162 NL	from MH		1048.52	1048.66	14740	0.130975	hexosyl loss
	162 NL	from precursor ion		524.766	524.886	652900	0.120649				a5 calc	± 0.500 Da
	150 NL	from precursor ion		530.766	530.458	8524	-0.307739	Amadori ???	pentose	or a 5	530.272	0.185942
	120 NL	from precursor ion		545.771	545.719	26220	-0.0521207	tetrose
	90 NL	from precursor ion		560.776	560.508	4619	-0.268503	Amadori	triose
										hexosyl transfer				Amadori	triose loss					pentose loss
	MODEL D	PID 1687		y+	y+		± 0.500 Da		y+	y+		± 0.500 Da		y+	y+		± 0.500 Da		y+	y+		± 0.500 Da
	score 346	AA		calc.	obs.	int.	err.		162 gain	162 gain	int.	err.		72 gain	72 gain	int.	err.		12 gain	12 gain	int.	err.
	scan time:	S	10						calc.	obs.			triose loss	calc.	obs.				calc.	obs.
	35.5319	L	9	1123.55	not obs.			162.053	1285.6	NA			72.0211	1195.57	not obs.			12	1135.55	not obs.
	z +2	G	8	1010.46	1010.57	97710	0.106146	162.053	1172.51	not obs.			72.0211	1082.48	not obs.			12	1022.46	not obs.
		N	7	953.44	953.56	13930	0.120109	162.053	1115.49	1115.76	246.4	0.267889	72.0211	1025.46	not obs.			12	965.44	965.596	101	0.155909
		W	6	839.397	839.545	26720	0.147837	162.053	1001.45	not obs.			72.0211	911.418	not obs.			12	851.397	851.332	4847	-0.065063
		V	5	653.317	653.416	59750	0.09865	162.053	815.37	815.826	3347	0.45613	72.0211	725.339	725.583	1040	0.244225	12	665.317	665.246	1365	-0.07115
		C	4	554.249	554.255	60980	0.006064	162.053	716.302	716.406	1611	0.104144	72.0211	626.27	626.304	1306	0.033939	12	566.249	566.447	7889	0.197564
		A	3	289.187	289.235	12530	0.048268	162.053	451.24	451.137	1931	-0.102852	72.0211	361.208	361.362	465	0.153743	12	301.187	301.31	355.6	0.122568		calc.
		A	2	218.15	218.156	7539	0.006082	162.053	380.203	380.41	378.1	0.207462	72.0211	290.171	290.247	2639	0.076357	12	230.15	230.183	155.7	0.032982	a3	230.15	0.032982
		K	1	147.113	not obs.			162.053	309.166	309.298	1843	0.132676	72.0211	219.134	219.119	1599	-0.014529	12	159.113	159.099	952	-0.014004
						279159					9356.5					7049					15665.3
								Amadori											hexosyl transfer	di-hexosyl
	MODEL D	PID 1687		b+	b+	int.	± 0.500 Da	triose loss	90 loss b+	90 loss b+	int.	± 0.500 Da	tetrose loss	120 loss b+	120 loss b+	int.	± 0.500 Da	hexosyl	b+162	b+162	int.	± 0.500 Da
	score 346	AA		calc.	obs. b+		err.	90 loss	calc.	obs.		err.		calc.	obs.		err.	transfer	calc.			err.
	scan time:	S	1	88.0393	NA			90.0317	-1.99239	NA			120.042	-32.003	NA			162.053	250.092	not obs.
	35.5319	L	2	201.123	201.076	53190	-0.047669	90.0317	111.092	NA			120.042	81.0811	NA			162.053	363.176	363.21	301.3	0.034011
	z +2	G	3	258.145	258.217	6350	0.072167	90.0317	168.113	not obs.		#VALUE!	120.042	138.103	NA			162.053	420.198	420.061	2523	-0.136953	y6++	420.202	-0.14132
		N	4	372.188	372.287	15450	0.09884	90.0317	282.156	282.346	1609	0.190235	120.042	252.146	252.3	1569	0.1546	162.053	534.241	534.675	4890	0.43412
		W	5	558.267	558.212	39820	-0.055173	90.0317	468.235	468.665	1068	0.429922	120.042	438.225	437.873	4332	-0.351913	162.053	720.32	720.178	3000	-0.141393
		V	6	657.335	657.321	19160	-0.014987	90.0317	567.304	567.391	6774	0.087008	120.042	537.293	537.088	19070	-0.205127	162.053	819.388	not obs.
		C	7	922.397	922.577	2385	0.179408	90.0317	832.366	832.546	5827	0.180303	120.042	802.355	not obs.			162.053	1084.45	1084.5	3251	0.051988
		A	8	993.435	993.668	6577	0.233295	90.0317	903.403	903.642	4256	0.23909	120.042	873.392	873.666	2206	0.273755	162.053	1155.49	not obs.
		A	9	1064.47	1064.57	4214	0.102581	90.0317	974.44	974.248	885	-0.192324	120.042	944.429	944.676	734.8	0.246541	162.053	1226.52	NA
		K	10
						147146					20419					27911.8					13965.3
				calc.	obs.	int.	± 0.500 Da
	180 NL	from MH		1030.51	1030.68	449.4	0.163555	hexose loss
	180 NL	from precursor ion		515.761	516.114	62770	0.353239
	162 NL	from MH		1048.52	1048.68	14050	0.158075	hexosyl loss
	162 NL	from precursor ion		524.766	524.955	731000	0.188849				a5 calc	± 0.500 Da
	150 NL	from precursor ion		530.766	530.385	8914	-0.380539	Amadori ???	pentose	or a 5	530.272	0.113142
	120 NL	from precursor ion		545.771	545.967	30080	0.196279	tetrose
	90 NL	from precursor ion		560.776	561.05	9825	0.273497	Amadori	triose

## Sheet: NL from precursors
			PID	Prot. Rank	Pos.	Sequence (46)	Glycans	Mods (variable)	PEP	Score	z	Obs. m/z	Calc. m/z	Obs. MH	Calc. MH	ppm err.	Off- By-X	Cleavage	Delta Score	Delta Mod. Score	Protein Name	Fragment Type	Comment	Scan #	Scan Time	Glycans Pos.	Obs.M	Calc.M
			1099		24	R.C[+162.05282]ELAAAMK[+43.00581]R.H		C1(Hex / 162.0528); K8(Carbamyl / 43.0058)	1.63e-05	310.9	2	599.281	599.284	1197.55	1197.56	-4.4971		Specific	310.93	44.7965	>sp|P00698|LYSC_CHICK Lysozyme C OS=Gallus gallus GN=LYZ PE=1 SV=1	collision-induced dissociation	00527771buch_ab4liz2_s.4896.4896.2	controllerType=0 controllerNumber=1 scan=4896	29.0103		1196.55	1196.55
	Spectral library		1522		75	L.QIN[+0.98402]SRWWC[+162.05282]NDGR.T		N3(Deamidated / 0.984); C8(Hex / 162.0528)	4.5e-05	370.1	2	849.367	849.37	1697.73	1697.73	-4.20214		NRagged	328.418	31.4626	>sp|P00698|LYSC_CHICK Lysozyme C OS=Gallus gallus GN=LYZ PE=1 SV=1	collision-induced dissociation	00527771buch_ab4liz2_s.6247.6247.2	controllerType=0 controllerNumber=1 scan=6247	33.5112		1696.72	1696.73
1099		Model D	1058	H	80	R.WWC[+162.05282]NDGRTPGSR.N		C3(Hex / 162.0528)	2.15e-06	392.3	2	798.846	798.847	1596.69	1596.69	-0.581595		Specific	392.298	392.298	>sp|P00698|LYSC_CHICK Lysozyme C OS=Gallus gallus GN=LYZ PE=1 SV=1	collision-induced dissociation	00527771buch_ab4liz2_s.4721.4721.2	controllerType=0 controllerNumber=1 scan=4721	28.4109		1595.68	1595.68
1509	Proc. 4	TFE	623		87	R.TPGSRNLC[+162.05282]N.I		C8(Hex / 162.0528)	0.00444	151.7	2	562.254	562.256	1123.5	1123.5	-4.30543		CRagged	52.897	52.897	>sp|P00698|LYSC_CHICK Lysozyme C OS=Gallus gallus GN=LYZ PE=1 SV=1	collision-induced dissociation	00527771buch_ab4liz2_s.2552.2552.2	controllerType=0 controllerNumber=1 scan=2552	20.4099		1122.49	1122.5
35286	Proc. 1	mBBr	630		87	R.TPGSRN[+0.98402]LC[+162.05282]N.I		N6(Deamidated / 0.984); C8(Hex / 162.0528)	0.0053	161.6	2	562.746	562.748	1124.48	1124.49	-3.68398		CRagged	47.2768	47.2768	>sp|P00698|LYSC_CHICK Lysozyme C OS=Gallus gallus GN=LYZ PE=1 SV=1	collision-induced dissociation	00527771buch_ab4liz2_s.2729.2729.2	controllerType=0 controllerNumber=1 scan=2729	21.0987		1123.48	1123.48
29210	Proc. 1	Qat	1059		87	R.TPGSRNLC[+162.05282]NIP.C		C8(Hex / 162.0528)	0.000421	162.2	2	667.323	667.324	1333.64	1333.64	-2.48479		CRagged	162.154	162.154	>sp|P00698|LYSC_CHICK Lysozyme C OS=Gallus gallus GN=LYZ PE=1 SV=1	collision-induced dissociation	00527771buch_ab4liz2_s.4740.4740.2	controllerType=0 controllerNumber=1 scan=4740	28.4838		1332.63	1332.63
1664	Proc. 3	Urea	757		104	S.SDITASVN[+0.98402]C[+162.05282]AK.K		N8(Deamidated / 0.984); C9(Hex / 162.0528)	8.38e-07	399.6	2	636.285	636.287	1271.56	1271.57	-3.82259		NRagged	399.585	399.585	>sp|P00698|LYSC_CHICK Lysozyme C OS=Gallus gallus GN=LYZ PE=1 SV=1	collision-induced dissociation	00527771buch_ab4liz2_s.3730.3730.2	controllerType=0 controllerNumber=1 scan=3730	24.8013		1270.56	1270.56
2635	Proc. 2	DMSO	1509	C1	40	R.GYSLGN[+0.98402]WVC[+162.05282]AAK.F		N6(Deamidated / 0.984); C9(Hex / 162.0528)	8.65e-08	465.3	2	716.329	716.327	1431.65	1431.65	3.68064		Specific	465.288	465.288	>sp|P00698|LYSC_CHICK Lysozyme C OS=Gallus gallus GN=LYZ PE=1 SV=1	collision-induced dissociation	1012692buch_Tcidhcd.8994.8994.2	controllerType=0 controllerNumber=1 scan=8994	48.5887		1430.64	1430.64
			1319	C	40	R.GYSLGNWVC[+162.05282]AAK.F		C9(Hex / 162.0528)	7.88e-10	533.4	2	715.835	715.835	1430.66	1430.66	0.210972		Specific	533.418	533.418	>sp|P00698|LYSC_CHICK Lysozyme C OS=Gallus gallus GN=LYZ PE=1 SV=1	collision-induced dissociation	1012692buch_Tcidhcd.8031.8031.2	controllerType=0 controllerNumber=1 scan=8031	44.1041		1429.65	1429.65
			1078	B	133	R.C[+162.05282]KGTDVQAWIR.G		C1(Hex / 162.0528)	5.62e-08	395	2	719.854	719.853	1438.7	1438.7	0.901379		Specific	394.959	394.959	>sp|P00698|LYSC_CHICK Lysozyme C OS=Gallus gallus GN=LYZ PE=1 SV=1	collision-induced dissociation	1012692buch_Tcidhcd.6600.6600.2	controllerType=0 controllerNumber=1 scan=6600	37.3636		1437.69	1437.69
			35286	G	64	R.NTDGSTDYGILQIN[+0.98402]SRWWC[+162.05282]NDGR.T		N14(Deamidated / 0.984); C19(Hex / 162.0528)	0.000643	208.3	2	1417.61	1417.62	2834.22	2834.23	-4.45396		Specific	208.276	19.8752	>sp|P00698|LYSC_CHICK Lysozyme C OS=Gallus gallus GN=LYZ PE=1 SV=1	collision-induced dissociation	00715jasio_1cid.17551.17551.2	controllerType=0 controllerNumber=1 scan=17551	83.0751		2833.21	2833.22
			23316	E	92	R.NLC[+162.05282]NIPC[+170.14190]SALLSSDITASVN.C		C3(Hex / 162.0528); C7(QAT / 170.1419)	5.95e-05	225.3	2	1184.1	1184.09	2367.19	2367.18	5.80266		CRagged	225.259	3.08094	>sp|P00698|LYSC_CHICK Lysozyme C OS=Gallus gallus GN=LYZ PE=1 SV=1	collision-induced dissociation	00715jasio_1cid.14725.14725.2	controllerType=0 controllerNumber=1 scan=14725	70.119		2366.18	2366.17
			23293		92	R.NLC[+170.14190]NIPC[+162.05282]SALLSSDITASVN.C		C3(QAT / 170.1419); C7(Hex / 162.0528)	5.82e-06	281.1	2	1184.1	1184.09	2367.19	2367.18	5.88379		CRagged	281.076	38.9352	>sp|P00698|LYSC_CHICK Lysozyme C OS=Gallus gallus GN=LYZ PE=1 SV=1	collision-induced dissociation	00715jasio_1cid.14557.14557.2	controllerType=0 controllerNumber=1 scan=14557	69.3554		2366.18	2366.17
			26284		92	R.NLC[+162.05282]NIPC[+170.14190]SALLSSDITASVNC[-33.98772]AK.K		C3(Hex / 162.0528); C7(QAT / 170.1419); C21(Cys->Dha / -33.9877)	2.29e-06	244.3	3	879.119	879.115	2635.34	2635.33	3.76471		Specific	244.297	24.6789	>sp|P00698|LYSC_CHICK Lysozyme C OS=Gallus gallus GN=LYZ PE=1 SV=1	collision-induced dissociation	00715jasio_1cid.14747.14747.3	controllerType=0 controllerNumber=1 scan=14747	70.22		2634.33	2634.32
			27267		92	R.NLC[-33.98772]NIPC[+170.14190]SALLSSDITASVNC[+162.05282]AK.K		C3(Cys->Dha / -33.9877); C7(QAT / 170.1419); C21(Hex / 162.0528)	1.74e-06	280.3	3	879.117	879.115	2635.34	2635.33	2.35611		Specific	280.275	80.6109	>sp|P00698|LYSC_CHICK Lysozyme C OS=Gallus gallus GN=LYZ PE=1 SV=1	collision-induced dissociation	00715jasio_1cid.15519.15519.3	controllerType=0 controllerNumber=1 scan=15519	73.7519		2634.33	2634.32
			15995	F	131	R.NRC[+162.05282]KGTDVQAWIR.G		C3(Hex / 162.0528)	1.18e-07	428.1	2	854.929	854.925	1708.85	1708.84	4.00919		Specific	428.063	428.063	>sp|P00698|LYSC_CHICK Lysozyme C OS=Gallus gallus GN=LYZ PE=1 SV=1	collision-induced dissociation	00715jasio_1cid.6518.6518.2	controllerType=0 controllerNumber=1 scan=6518	33.3362		1707.84	1707.84
			3393	A	135	K.GTDVQAWIRGC[+162.05282]R.L		C11(Hex / 162.0528)	4.81e-08	374.6	2	762.37	762.367	1523.73	1523.73	3.49373		Specific	374.639	374.639	>sp|P00698|LYSC_CHICK Lysozyme C OS=Gallus gallus GN=LYZ PE=1 SV=1	collision-induced dissociation	00715jasio_1cid.8482.8482.2	controllerType=0 controllerNumber=1 scan=8482	42.0466		1522.73	1522.72
			22719		24	R.C[+162.05282]ELAAAMKRHGLDNYR.G		C1(Hex / 162.0528)	0.00228	206.3	3	670.658	670.656	2009.96	2009.95	3.64734		Specific	206.337	206.337	>sp|P00698|LYSC_CHICK Lysozyme C OS=Gallus gallus GN=LYZ PE=1 SV=1	collision-induced dissociation	00715jasio_3cid.6371.6371.3	controllerType=0 controllerNumber=1 scan=6371	33.0098		2008.95	2008.95
			29210	D	64	R.N[+0.98402]TDGSTDYGILQINSRWWC[+162.05282]NDGR.T		N1(Deamidated / 0.984); C19(Hex / 162.0528)	0.000668	156.5	2	1417.63	1417.62	2834.25	2834.23	5.69215		Specific	156.454	69.6434	>sp|P00698|LYSC_CHICK Lysozyme C OS=Gallus gallus GN=LYZ PE=1 SV=1	collision-induced dissociation	00715jasio_3cid.15932.15932.2	controllerType=0 controllerNumber=1 scan=15932	76.2771		2833.24	2833.22
			25077		92	R.NLC[-33.98772]NIPC[+162.05282]SALLSSDITASVNC[+170.14190]AK.K		C3(Cys->Dha / -33.9877); C7(Hex / 162.0528); C21(QAT / 170.1419)	1.72e-05	300.7	3	879.117	879.115	2635.34	2635.33	2.07819		Specific	300.728	45.5078	>sp|P00698|LYSC_CHICK Lysozyme C OS=Gallus gallus GN=LYZ PE=1 SV=1	collision-induced dissociation	00715jasio_3cid.15415.15415.3	controllerType=0 controllerNumber=1 scan=15415	73.8982		2634.33	2634.32
			19826		131	R.[+43.00581]NRC[+162.05282]KGTDVQAWIR.G		NTerm(Carbamyl / 43.0058); C3(Hex / 162.0528)	7.39e-06	336.4	2	876.431	876.428	1751.86	1751.85	3.58046		Specific	336.416	31.3641	>sp|P00698|LYSC_CHICK Lysozyme C OS=Gallus gallus GN=LYZ PE=1 SV=1	collision-induced dissociation	00715jasio_3cid.7977.7977.2	controllerType=0 controllerNumber=1 scan=7977	40.2108		1750.85	1750.84
			5255		131	R.N[+0.98402]RC[+162.05282]KGTDVQAWIR.G		N1(Deamidated / 0.984); C3(Hex / 162.0528)	2.57e-08	505.2	2	855.42	855.417	1709.83	1709.83	3.35795		Specific	505.217	404.873	>sp|P00698|LYSC_CHICK Lysozyme C OS=Gallus gallus GN=LYZ PE=1 SV=1	collision-induced dissociation	00715jasio_3cid.7693.7693.2	controllerType=0 controllerNumber=1 scan=7693	38.9359		1708.83	1708.82
			2294	B	133	R.C[+162.05282]KGTDVQAWIR.G		C1(Hex / 162.0528)	1.36e-06	338.5	2	719.856	719.853	1438.71	1438.7	4.21042		Specific	338.502	338.502	>sp|P00698|LYSC_CHICK Lysozyme C OS=Gallus gallus GN=LYZ PE=1 SV=1	collision-induced dissociation	00715jasio_3cid.8032.8032.2	controllerType=0 controllerNumber=1 scan=8032	40.4557		1437.7	1437.69
			2635		20	K.VFGRC[+162.05282]ELAAAMK.R		C5(Hex / 162.0528)	0.00292	156.1	3	486.575	486.576	1457.71	1457.71	-1.03051		Specific	156.139	156.139	>sp|P00698|LYSC_CHICK Lysozyme C OS=Gallus gallus GN=LYZ PE=1 SV=1	collision-induced dissociation	012171746buch_d_cid.6796.6796.3	controllerType=0 controllerNumber=1 scan=6796	36.6212		1456.7	1456.71
			22875	G	64	R.NTDGSTDYGILQIN[+0.98402]SRWWC[+162.05282]NDGR.T		N14(Deamidated / 0.984); C19(Hex / 162.0528)	5.66e-12	788.4	3	945.421	945.416	2834.25	2834.23	5.62869		Specific	788.385	24.0714	>sp|P00698|LYSC_CHICK Lysozyme C OS=Gallus gallus GN=LYZ PE=1 SV=1	collision-induced dissociation	012171746buch_d_cid.13211.13211.3	controllerType=0 controllerNumber=1 scan=13211	72.2227		2833.24	2833.22
			3741		80	R.WWC[+162.05282]N[+0.98402]DGRTPGSR.N		C3(Hex / 162.0528); N4(Deamidated / 0.984)	0.0031	276.4	3	533.225	533.228	1597.66	1597.67	-5.43274		Specific	276.424	276.424	>sp|P00698|LYSC_CHICK Lysozyme C OS=Gallus gallus GN=LYZ PE=1 SV=1	collision-induced dissociation	012171746buch_d_cid.5039.5039.3	controllerType=0 controllerNumber=1 scan=5039	27.2546		1596.65	1596.66
			3779	F	131	R.NRC[+162.05282]KGTDVQAWIR.G		C3(Hex / 162.0528)	0.00391	278	3	570.285	570.286	1708.84	1708.84	-2.36749		Specific	277.961	277.961	>sp|P00698|LYSC_CHICK Lysozyme C OS=Gallus gallus GN=LYZ PE=1 SV=1	collision-induced dissociation	012171746buch_d_cid.5512.5512.3	controllerType=0 controllerNumber=1 scan=5512	29.7588		1707.83	1707.84
			3881		131	R.N[+0.98402]RC[+162.05282]KGTDVQAWIR.G		N1(Deamidated / 0.984); C3(Hex / 162.0528)	0.000664	309.7	3	570.613	570.614	1709.83	1709.83	-1.36351		Specific	309.716	309.716	>sp|P00698|LYSC_CHICK Lysozyme C OS=Gallus gallus GN=LYZ PE=1 SV=1	collision-induced dissociation	012171746buch_d_cid.6497.6497.3	controllerType=0 controllerNumber=1 scan=6497	34.996		1708.82	1708.82
			4123		131	R.N[+0.98402]RC[+162.05282]K[+43.00581]GTDVQAWIR.G		N1(Deamidated / 0.984); C3(Hex / 162.0528); K4(Carbamyl / 43.0058)	0.000586	248.4	3	584.95	584.949	1752.84	1752.83	1.58254		Specific	248.426	61.8939	>sp|P00698|LYSC_CHICK Lysozyme C OS=Gallus gallus GN=LYZ PE=1 SV=1	collision-induced dissociation	012171746buch_d_cid.8159.8159.3	controllerType=0 controllerNumber=1 scan=8159	44.1403		1751.83	1751.83
			2655	A	135	K.GTDVQAWIRGC[+162.05282]R.L		C11(Hex / 162.0528)	0.000304	288.4	3	508.58	508.581	1523.72	1523.73	-1.71186		Specific	188.971	188.971	>sp|P00698|LYSC_CHICK Lysozyme C OS=Gallus gallus GN=LYZ PE=1 SV=1	collision-induced dissociation	012171746buch_d_cid.6972.6972.3	controllerType=0 controllerNumber=1 scan=6972	37.6022		1522.72	1522.72
			1664	C	40	R.GYSLGNWVC[+162.05282]AAK.F		C9(Hex / 162.0528)	9.88e-08	535	2	715.836	715.835	1430.66	1430.66	1.66148		Specific	534.983	534.983	>sp|P00698|LYSC_CHICK Lysozyme C OS=Gallus gallus GN=LYZ PE=1 SV=1	collision-induced dissociation	012171745buch_m_cid.9501.9501.2	controllerType=0 controllerNumber=1 scan=9501	52.6735		1429.66	1429.65
			29027		58	N.[+43.00581]TQ[+0.98402]ATNRNTDGSTDYGILQINSRWWC[+162.05282]NDGR.T		NTerm(Carbamyl / 43.0058); Q2(Deamidated / 0.984); C25(Hex / 162.0528)	0.429	230.8	3	1183.53	1183.53	3548.58	3548.57	2.77796		NRagged	212.644	29.0279	>sp|P00698|LYSC_CHICK Lysozyme C OS=Gallus gallus GN=LYZ PE=1 SV=1	collision-induced dissociation	012171745buch_m_cid.13012.13012.3	controllerType=0 controllerNumber=1 scan=13012	73.0261		3547.58	3547.57
			17169	D	64	R.N[+0.98402]TDGSTDYGILQINSRWWC[+162.05282]NDGR.T		N1(Deamidated / 0.984); C19(Hex / 162.0528)	4.78e-06	529.9	3	945.416	945.416	2834.23	2834.23	0.174324		Specific	529.898	24.553	>sp|P00698|LYSC_CHICK Lysozyme C OS=Gallus gallus GN=LYZ PE=1 SV=1	collision-induced dissociation	012171745buch_m_cid.12767.12767.3	controllerType=0 controllerNumber=1 scan=12767	71.6046		2833.23	2833.22
			17269		64	R.NTDGSTDYGILQIN[+0.98402]SRWWC[+162.05282]N[+0.98402]DGR.T		N14(Deamidated / 0.984); C19(Hex / 162.0528); N20(Deamidated / 0.984)	1.04e-10	690.2	3	945.747	945.744	2835.23	2835.22	3.83587		Specific	690.239	57.879	>sp|P00698|LYSC_CHICK Lysozyme C OS=Gallus gallus GN=LYZ PE=1 SV=1	collision-induced dissociation	012171745buch_m_cid.13609.13609.3	controllerType=0 controllerNumber=1 scan=13609	76.5203		2834.22	2834.21
			17210	Ga	64	R.NTDGSTDYGILQINSRWWC[+162.05282]N[+0.98402]DGR.T		C19(Hex / 162.0528); N20(Deamidated / 0.984)	1.04e-12	776.8	3	945.419	945.416	2834.24	2834.23	3.20127		Specific	776.759	42.4704	>sp|P00698|LYSC_CHICK Lysozyme C OS=Gallus gallus GN=LYZ PE=1 SV=1	collision-induced dissociation	012171745buch_m_cid.13028.13028.3	controllerType=0 controllerNumber=1 scan=13028	73.1165		2833.23	2833.22
			16138		65	N.[+43.00581]TDGSTDYGILQIN[+0.98402]SRWWC[+162.05282]N[+0.98402]DGR.T		NTerm(Carbamyl / 43.0058); N13(Deamidated / 0.984); C18(Hex / 162.0528); N19(Deamidated / 0.984)	1.24e-05	413.7	3	922.066	922.065	2764.18	2764.18	1.63578		NRagged	413.724	6.46307	>sp|P00698|LYSC_CHICK Lysozyme C OS=Gallus gallus GN=LYZ PE=1 SV=1	collision-induced dissociation	012171745buch_m_cid.15095.15095.3	controllerType=0 controllerNumber=1 scan=15095	85.2123		2763.18	2763.17
			16145		65	N.[+43.00581]TDGSTDYGILQINSRWWC[+162.05282]N[+0.98402]DGR.T		NTerm(Carbamyl / 43.0058); C18(Hex / 162.0528); N19(Deamidated / 0.984)	0.000129	385.1	3	921.735	921.737	2763.19	2763.2	-1.86533		NRagged	385.129	29.9769	>sp|P00698|LYSC_CHICK Lysozyme C OS=Gallus gallus GN=LYZ PE=1 SV=1	collision-induced dissociation	012171745buch_m_cid.15157.15157.3	controllerType=0 controllerNumber=1 scan=15157	85.5717		2762.18	2762.19
			12346		65	N.TDGSTDYGILQIN[+0.98402]SRWWC[+162.05282]N[+0.98402]DGR.T		N13(Deamidated / 0.984); C18(Hex / 162.0528); N19(Deamidated / 0.984)	9.76e-06	498.5	3	907.734	907.729	2721.19	2721.17	4.6925		NRagged	460.257	77.517	>sp|P00698|LYSC_CHICK Lysozyme C OS=Gallus gallus GN=LYZ PE=1 SV=1	collision-induced dissociation	012171745buch_m_cid.13711.13711.3	controllerType=0 controllerNumber=1 scan=13711	77.1153		2720.18	2720.17
			12233		65	N.TDGSTDYGILQIN[+0.98402]SRWWC[+162.05282]NDGR.T		N13(Deamidated / 0.984); C18(Hex / 162.0528)	2.76e-07	564.3	3	907.404	907.401	2720.2	2720.19	3.07278		NRagged	564.324	29.0761	>sp|P00698|LYSC_CHICK Lysozyme C OS=Gallus gallus GN=LYZ PE=1 SV=1	collision-induced dissociation	012171745buch_m_cid.13301.13301.3	controllerType=0 controllerNumber=1 scan=13301	74.7206		2719.19	2719.18
			462		80	R.WWC[+162.05282]N[+0.98402]DGR.T		C3(Hex / 162.0528); N4(Deamidated / 0.984)	0.00152	225.4	2	550.212	550.211	1099.42	1099.41	2.48891		Specific	225.418	225.418	>sp|P00698|LYSC_CHICK Lysozyme C OS=Gallus gallus GN=LYZ PE=1 SV=1	collision-induced dissociation	012171745buch_m_cid.5171.5171.2	controllerType=0 controllerNumber=1 scan=5171	28.7041		1098.41	1098.41
			383		80	R.WWC[+162.05282]NDGR.T		C3(Hex / 162.0528)	0.0014	217.6	2	549.72	549.719	1098.43	1098.43	2.05741		Specific	217.556	217.556	>sp|P00698|LYSC_CHICK Lysozyme C OS=Gallus gallus GN=LYZ PE=1 SV=1	collision-induced dissociation	012171745buch_m_cid.4684.4684.2	controllerType=0 controllerNumber=1 scan=4684	26.0501		1097.43	1097.42
			2011	H	80	R.WWC[+162.05282]NDGRTPGSR.N		C3(Hex / 162.0528)	0.00226	246.9	3	532.902	532.9	1596.69	1596.69	2.9918		Specific	246.936	246.936	>sp|P00698|LYSC_CHICK Lysozyme C OS=Gallus gallus GN=LYZ PE=1 SV=1	collision-induced dissociation	012171745buch_m_cid.4395.4395.3	controllerType=0 controllerNumber=1 scan=4395	24.482		1595.68	1595.68
			16917		87	R.TPGSRNLC[+162.05282]NIPC[+162.05282]SALLSSDITASVN.C		C8(Hex / 162.0528); C12(Hex / 162.0528)	0.0207	229.2	3	953.12	953.12	2857.35	2857.34	0.843284		CRagged	229.239	229.239	>sp|P00698|LYSC_CHICK Lysozyme C OS=Gallus gallus GN=LYZ PE=1 SV=1	collision-induced dissociation	012171745buch_m_cid.11272.11272.3	controllerType=0 controllerNumber=1 scan=11272	62.8917		2856.34	2856.34
			358		92	R.NLC[+162.05282]NIPC[+170.14190].S		C3(Hex / 162.0528); C7(QAT / 170.1419)	0.0122	188.4	2	554.773	554.772	1108.54	1108.54	0.657641		CRagged	188.408	135.167	>sp|P00698|LYSC_CHICK Lysozyme C OS=Gallus gallus GN=LYZ PE=1 SV=1	collision-induced dissociation	012171745buch_m_cid.4413.4413.2	controllerType=0 controllerNumber=1 scan=4413	24.582		1107.53	1107.53
			2417		92	R.NLC[+170.14190]NIPC[+162.05282]SALLS.S		C3(QAT / 170.1419); C7(Hex / 162.0528)	0.0114	197.9	2	790.409	790.407	1579.81	1579.81	2.93995		CRagged	197.916	7.22129	>sp|P00698|LYSC_CHICK Lysozyme C OS=Gallus gallus GN=LYZ PE=1 SV=1	collision-induced dissociation	012171745buch_m_cid.9261.9261.2	controllerType=0 controllerNumber=1 scan=9261	51.3031		1578.8	1578.8
			8210		92	R.NLC[+170.14190]NIPC[+162.05282]SALLSSDITA.S		C3(QAT / 170.1419); C7(Hex / 162.0528)	0.000252	244.5	2	1034.02	1034.02	2067.04	2067.03	1.66064		CRagged	244.512	44.5652	>sp|P00698|LYSC_CHICK Lysozyme C OS=Gallus gallus GN=LYZ PE=1 SV=1	collision-induced dissociation	012171745buch_m_cid.12513.12513.2	controllerType=0 controllerNumber=1 scan=12513	70.1204		2066.03	2066.03
			8039	E	92	R.NLC[+162.05282]NIPC[+170.14190]SALLSSDITASVN.C		C3(Hex / 162.0528); C7(QAT / 170.1419)	0.432	182.1	3	789.732	789.731	2367.18	2367.18	1.85488		CRagged	182.092	28.7932	>sp|P00698|LYSC_CHICK Lysozyme C OS=Gallus gallus GN=LYZ PE=1 SV=1	collision-induced dissociation	012171745buch_m_cid.11421.11421.3	controllerType=0 controllerNumber=1 scan=11421	63.7601		2366.18	2366.17
			16928		92	R.NLC[+170.14190]NIPC[+162.05282]SALLSSDITASVN[+0.98402]C[+162.05282]AK.K		C3(QAT / 170.1419); C7(Hex / 162.0528); N20(Deamidated / 0.984); C21(Hex / 162.0528)	0.000819	334.7	3	944.796	944.79	2832.37	2832.36	5.59975		Specific	308.282	6.74545	>sp|P00698|LYSC_CHICK Lysozyme C OS=Gallus gallus GN=LYZ PE=1 SV=1	collision-induced dissociation	012171745buch_m_cid.11477.11477.3	controllerType=0 controllerNumber=1 scan=11477	64.0784		2831.36	2831.35
			6491		99	C.[+43.00581]SALLSSDITASVN[+0.98402]C[+162.05282]AK.K		NTerm(Carbamyl / 43.0058); N13(Deamidated / 0.984); C14(Hex / 162.0528)	2.9e-05	357.1	2	893.426	893.425	1785.85	1785.84	1.84458		NRagged	321.405	321.405	>sp|P00698|LYSC_CHICK Lysozyme C OS=Gallus gallus GN=LYZ PE=1 SV=1	collision-induced dissociation	012171745buch_m_cid.10590.10590.2	controllerType=0 controllerNumber=1 scan=10590	58.9907		1784.84	1784.83
																																													I61
			1099		Model D
			1509	Proc. 4	TFE											http://www.ionsource.com/Card/immon/more.htm															159.0922
			35286	Proc. 1	mBBr
			29210	Proc. 1	Qat
			1664	Proc. 3	Urea																												from				from				from				from				Hex+Guanidine
			2635	Proc. 2	DMSO																								Korekta obl.				MH	Arg			MH	Arg			precursor				precursor	Arg			loss
																																	ion				ion				ion				ion
																													162 NL	162 NL	intensity	err tol	179NL	179 NL			204NL	204 NL			162 NL/z	162 NL	intensity	err tol	179NL/z	179 NL	intensity	err tol	221 NL/z
			PID	Prot. Rank	Pos.	Sequence (46)	Glycans	Mods (variable)	PEP	Score	z	Obs. m/z	Calc. m/z	Obs. MH	Calc. MH	ppm err.	Off- By-X	Cleavage	Delta Score	Delta Mod. Score	Protein Name	Fragment Type	Comment	Scan #	Scan Time	Glycans Pos.	Obs.M	Calc.M	calc	obs		#VALUE!	calc	obs			calc	obs			calc	obs			calc	obs			calc
	spectral library		1099		24	R.C[+162.05282]ELAAAMK[+43.00581]R.H	selected	C1(Hex / 162.0528); K8(Carbamyl / 43.0058)	1.63e-05	310.9	2	599.281	599.284	1197.55	1197.56	-4.4971		Specific	310.93	44.7965	>sp|P00698|LYSC_CHICK Lysozyme C OS=Gallus gallus GN=LYZ PE=1 SV=1	collision-induced dissociation	00527771buch_ab4liz2_s.4896.4896.2	controllerType=0 controllerNumber=1 scan=4896	29.0103		1196.55	1196.55	1035.51	1035.61	15280	0.102811	1018.48	1018.48		0	993.486	993.486		0	518.257	518.387	368600	0.129367	509.744	509.744			488.733
1099		Model D	1522		75	L.QIN[+0.98402]SRWWC[+162.05282]NDGR.T		N3(Deamidated / 0.984); C8(Hex / 162.0528)	4.5e-05	370.1	2	849.367	849.37	1697.73	1697.73	-4.20214		NRagged	328.418	31.4626	>sp|P00698|LYSC_CHICK Lysozyme C OS=Gallus gallus GN=LYZ PE=1 SV=1	collision-induced dissociation	00527771buch_ab4liz2_s.6247.6247.2	controllerType=0 controllerNumber=1 scan=6247	33.5112		1696.72	1696.73	1535.68	not obs.			1518.65	1518.65		0	1493.66	1493.66		0	768.344	768.696	25400/b6-18	0.351746	759.831	759.831			738.82
1509	Proc. 4	TFE	1058	H	80	R.WWC[+162.05282]NDGRTPGSR.N		C3(Hex / 162.0528)	2.15e-06	392.3	2	798.846	798.847	1596.69	1596.69	-0.581595		Specific	392.298	392.298	>sp|P00698|LYSC_CHICK Lysozyme C OS=Gallus gallus GN=LYZ PE=1 SV=1	collision-induced dissociation	00527771buch_ab4liz2_s.4721.4721.2	controllerType=0 controllerNumber=1 scan=4721	28.4109		1595.68	1595.68	1434.63	1434.78	47.72	0.142955	1417.61	1417.61		0	1392.61	1392.61		0	717.82	718.095	13680	0.274889	709.307	709.307			688.296
35286	Proc. 1	mBBr	623		87	R.TPGSRNLC[+162.05282]N.I		C8(Hex / 162.0528)	0.00444	151.7	2	562.254	562.256	1123.5	1123.5	-4.30543		CRagged	52.897	52.897	>sp|P00698|LYSC_CHICK Lysozyme C OS=Gallus gallus GN=LYZ PE=1 SV=1	collision-induced dissociation	00527771buch_ab4liz2_s.2552.2552.2	controllerType=0 controllerNumber=1 scan=2552	20.4099		1122.49	1122.5	961.452	961.604	472.9	0.151695	944.425	944.425		0	919.43	919.43		0	481.23	481.487	43850/b5-18	0.257659	472.716				451.705
29210	Proc. 1	Qat	630		87	R.TPGSRN[+0.98402]LC[+162.05282]N.I		N6(Deamidated / 0.984); C8(Hex / 162.0528)	0.0053	161.6	2	562.746	562.748	1124.48	1124.49	-3.68398		CRagged	47.2768	47.2768	>sp|P00698|LYSC_CHICK Lysozyme C OS=Gallus gallus GN=LYZ PE=1 SV=1	collision-induced dissociation	00527771buch_ab4liz2_s.2729.2729.2	controllerType=0 controllerNumber=1 scan=2729	21.0987		1123.48	1123.48	962.436	962.596	1626	0.160079	945.409	945.409		0	920.414	920.414		0	481.722	481.77	163000	0.0484513	473.208				452.197
1664	Proc. 3	Urea	1059		87	R.TPGSRNLC[+162.05282]NIP.C		C8(Hex / 162.0528)	0.000421	162.2	2	667.323	667.324	1333.64	1333.64	-2.48479		CRagged	162.154	162.154	>sp|P00698|LYSC_CHICK Lysozyme C OS=Gallus gallus GN=LYZ PE=1 SV=1	collision-induced dissociation	00527771buch_ab4liz2_s.4740.4740.2	controllerType=0 controllerNumber=1 scan=4740	28.4838		1332.63	1332.63	1171.59	1171.77	90.31	0.177675	1154.56	1154.56		0	1129.57	1129.57		0	586.298	586.154	52500	-0.143951	577.785				556.774
2635	Proc. 2	DMSO	757		104	S.SDITASVN[+0.98402]C[+162.05282]AK.K		N8(Deamidated / 0.984); C9(Hex / 162.0528)	8.38e-07	399.6	2	636.285	636.287	1271.56	1271.57	-3.82259		NRagged	399.585	399.585	>sp|P00698|LYSC_CHICK Lysozyme C OS=Gallus gallus GN=LYZ PE=1 SV=1	collision-induced dissociation	00527771buch_ab4liz2_s.3730.3730.2	controllerType=0 controllerNumber=1 scan=3730	24.8013		1270.56	1270.56	1109.51	1109.67	1686	0.153079	1092.49	1092.49		0	1067.49	1067.49		0	555.261	not obs.			546.748				525.737
			1509	C1	40	R.GYSLGN[+0.98402]WVC[+162.05282]AAK.F		N6(Deamidated / 0.984); C9(Hex / 162.0528)	8.65e-08	465.3	2	716.329	716.327	1431.65	1431.65	3.68064		Specific	465.288	465.288	>sp|P00698|LYSC_CHICK Lysozyme C OS=Gallus gallus GN=LYZ PE=1 SV=1	collision-induced dissociation	1012692buch_Tcidhcd.8994.8994.2	controllerType=0 controllerNumber=1 scan=8994	48.5887		1430.64	1430.64	1269.59	1269.6	16460	0.002969	1252.57	1252.57		0	1227.57	1227.57		0	635.3	635.155	2391000	-0.144954	626.787				605.776
			1319	C	40	R.GYSLGNWVC[+162.05282]AAK.F		C9(Hex / 162.0528)	7.88e-10	533.4	2	715.835	715.835	1430.66	1430.66	0.210972		Specific	533.418	533.418	>sp|P00698|LYSC_CHICK Lysozyme C OS=Gallus gallus GN=LYZ PE=1 SV=1	collision-induced dissociation	1012692buch_Tcidhcd.8031.8031.2	controllerType=0 controllerNumber=1 scan=8031	44.1041		1429.65	1429.65	1268.61	1268.52	28690	-0.087515	1251.58	1251.58		0	1226.59	1226.59		0	634.808	635.036	1730000	0.228054	626.295				605.284
			1078	B	133	R.C[+162.05282]KGTDVQAWIR.G		C1(Hex / 162.0528)	5.62e-08	395	2	719.854	719.853	1438.7	1438.7	0.901379		Specific	394.959	394.959	>sp|P00698|LYSC_CHICK Lysozyme C OS=Gallus gallus GN=LYZ PE=1 SV=1	collision-induced dissociation	1012692buch_Tcidhcd.6600.6600.2	controllerType=0 controllerNumber=1 scan=6600	37.3636		1437.69	1437.69	1276.65	1276.61	38000	-0.035965	1259.62	1259.62		0	1234.62	1234.62		0	638.827	639.187	4185000/a5	0.36043	630.314	630.314			609.303
			35286	G	64	R.NTDGSTDYGILQIN[+0.98402]SRWWC[+162.05282]NDGR.T		N14(Deamidated / 0.984); C19(Hex / 162.0528)	0.000643	208.3	2	1417.61	1417.62	2834.22	2834.23	-4.45396		Specific	208.276	19.8752	>sp|P00698|LYSC_CHICK Lysozyme C OS=Gallus gallus GN=LYZ PE=1 SV=1	collision-induced dissociation	00715jasio_1cid.17551.17551.2	controllerType=0 controllerNumber=1 scan=17551	83.0751		2833.21	2833.22	2672.18	NA			2655.15	2655.15		0	2630.16	2630.16		0	1336.59	1336.52	1461	-0.0732387	1328.08				1307.07
			23316	E	92	R.NLC[+162.05282]NIPC[+170.14190]SALLSSDITASVN.C		C3(Hex / 162.0528); C7(QAT / 170.1419)	5.95e-05	225.3	2	1184.1	1184.09	2367.19	2367.18	5.80266		CRagged	225.259	3.08094	>sp|P00698|LYSC_CHICK Lysozyme C OS=Gallus gallus GN=LYZ PE=1 SV=1	collision-induced dissociation	00715jasio_1cid.14725.14725.2	controllerType=0 controllerNumber=1 scan=14725	70.119		2366.18	2366.17	2205.13	NA			2188.1	2188.1		0	2163.1	2163.1		0	1103.07	1103	22710	-0.0650107	1094.55				1073.54
			23293		92	R.NLC[+170.14190]NIPC[+162.05282]SALLSSDITASVN.C		C3(QAT / 170.1419); C7(Hex / 162.0528)	5.82e-06	281.1	2	1184.1	1184.09	2367.19	2367.18	5.88379		CRagged	281.076	38.9352	>sp|P00698|LYSC_CHICK Lysozyme C OS=Gallus gallus GN=LYZ PE=1 SV=1	collision-induced dissociation	00715jasio_1cid.14557.14557.2	controllerType=0 controllerNumber=1 scan=14557	69.3554		2366.18	2366.17	2205.13	NA			2188.1	2188.1		0	2163.1	2163.1		0	1103.07	1103.42	21650	0.354589	1094.55				1073.54
			15995	F	131	R.NRC[+162.05282]KGTDVQAWIR.G		C3(Hex / 162.0528)	1.18e-07	428.1	2	854.929	854.925	1708.85	1708.84	4.00919		Specific	428.063	428.063	>sp|P00698|LYSC_CHICK Lysozyme C OS=Gallus gallus GN=LYZ PE=1 SV=1	collision-induced dissociation	00715jasio_1cid.6518.6518.2	controllerType=0 controllerNumber=1 scan=6518	33.3362		1707.84	1707.84	1546.79	not obs.			1529.76	1529.76		0	1504.77	1504.77		0	773.899	773.653	3144000	-0.245791	765.386	765.386			744.375
			3393	A	135	K.GTDVQAWIRGC[+162.05282]R.L		C11(Hex / 162.0528)	4.81e-08	374.6	2	762.37	762.367	1523.73	1523.73	3.49373		Specific	374.639	374.639	>sp|P00698|LYSC_CHICK Lysozyme C OS=Gallus gallus GN=LYZ PE=1 SV=1	collision-induced dissociation	00715jasio_1cid.8482.8482.2	controllerType=0 controllerNumber=1 scan=8482	42.0466		1522.73	1522.72	1361.67	1362.12	1576	0.446925	1344.65	1344.65		0	1319.65	1319.65		0	681.341	681.638	403700	0.297624	672.827	672.827			651.817
			29210	D	64	R.N[+0.98402]TDGSTDYGILQINSRWWC[+162.05282]NDGR.T		N1(Deamidated / 0.984); C19(Hex / 162.0528)	0.000668	156.5	2	1417.63	1417.62	2834.25	2834.23	5.69215		Specific	156.454	69.6434	>sp|P00698|LYSC_CHICK Lysozyme C OS=Gallus gallus GN=LYZ PE=1 SV=1	collision-induced dissociation	00715jasio_3cid.15932.15932.2	controllerType=0 controllerNumber=1 scan=15932	76.2771		2833.24	2833.22	2672.18	NA			2655.15	2655.15		0	2630.16	2630.16		0	1336.59	1336.94	3305	0.344561	1328.08				1307.07
			19826		131	R.[+43.00581]NRC[+162.05282]KGTDVQAWIR.G		NTerm(Carbamyl / 43.0058); C3(Hex / 162.0528)	7.39e-06	336.4	2	876.431	876.428	1751.86	1751.85	3.58046		Specific	336.416	31.3641	>sp|P00698|LYSC_CHICK Lysozyme C OS=Gallus gallus GN=LYZ PE=1 SV=1	collision-induced dissociation	00715jasio_3cid.7977.7977.2	controllerType=0 controllerNumber=1 scan=7977	40.2108		1750.85	1750.84	1589.8	not obs.			1572.77	1572.77		0	1547.77	1547.77		0	795.402	795.349	99440	-0.0532977	786.889				765.878
			5255		131	R.N[+0.98402]RC[+162.05282]KGTDVQAWIR.G		N1(Deamidated / 0.984); C3(Hex / 162.0528)	2.57e-08	505.2	2	855.42	855.417	1709.83	1709.83	3.35795		Specific	505.217	404.873	>sp|P00698|LYSC_CHICK Lysozyme C OS=Gallus gallus GN=LYZ PE=1 SV=1	collision-induced dissociation	00715jasio_3cid.7693.7693.2	controllerType=0 controllerNumber=1 scan=7693	38.9359		1708.83	1708.82	1547.77	not obs.			1530.75	1530.75		0	1505.75	1505.75		0	774.391	774.634	799100	0.243001	765.878				744.867
			2294	B	133	R.C[+162.05282]KGTDVQAWIR.G		C1(Hex / 162.0528)	1.36e-06	338.5	2	719.856	719.853	1438.71	1438.7	4.21042		Specific	338.502	338.502	>sp|P00698|LYSC_CHICK Lysozyme C OS=Gallus gallus GN=LYZ PE=1 SV=1	collision-induced dissociation	00715jasio_3cid.8032.8032.2	controllerType=0 controllerNumber=1 scan=8032	40.4557		1437.7	1437.69	1276.65	1276.8	44730	0.156635	1259.62	1259.62		0	1234.62	1234.62		0	638.827	639.111	5515000/a5	0.284129	630.314				609.303
			1664	C	40	R.GYSLGNWVC[+162.05282]AAK.F		C9(Hex / 162.0528)	9.88e-08	535	2	715.836	715.835	1430.66	1430.66	1.66148		Specific	534.983	534.983	>sp|P00698|LYSC_CHICK Lysozyme C OS=Gallus gallus GN=LYZ PE=1 SV=1	collision-induced dissociation	012171745buch_m_cid.9501.9501.2	controllerType=0 controllerNumber=1 scan=9501	52.6735		1429.66	1429.65	1268.61	1268.58	175.3	-0.0267155	1251.58	1251.58		0	1226.59	1226.59		0	634.808	635.065	18090	0.257154	626.295				605.284
			462		80	R.WWC[+162.05282]N[+0.98402]DGR.T		C3(Hex / 162.0528); N4(Deamidated / 0.984)	0.00152	225.4	2	550.212	550.211	1099.42	1099.41	2.48891		Specific	225.418	225.418	>sp|P00698|LYSC_CHICK Lysozyme C OS=Gallus gallus GN=LYZ PE=1 SV=1	collision-induced dissociation	012171745buch_m_cid.5171.5171.2	controllerType=0 controllerNumber=1 scan=5171	28.7041		1098.41	1098.41	937.362	937.405	5691	0.0429785	920.336	920.336		0	895.34	895.34		0	469.185	469.338	145200	0.153401	460.671				439.66
			383		80	R.WWC[+162.05282]NDGR.T		C3(Hex / 162.0528)	0.0014	217.6	2	549.72	549.719	1098.43	1098.43	2.05741		Specific	217.556	217.556	>sp|P00698|LYSC_CHICK Lysozyme C OS=Gallus gallus GN=LYZ PE=1 SV=1	collision-induced dissociation	012171745buch_m_cid.4684.4684.2	controllerType=0 controllerNumber=1 scan=4684	26.0501		1097.43	1097.42	936.378	936.403	7852	0.0252945	919.352	919.352		0	894.356	894.356		0	468.693	468.888	253700	0.195109	460.179				439.168
			358		92	R.NLC[+162.05282]NIPC[+170.14190].S		C3(Hex / 162.0528); C7(QAT / 170.1419)	0.0122	188.4	2	554.773	554.772	1108.54	1108.54	0.657641		CRagged	188.408	135.167	>sp|P00698|LYSC_CHICK Lysozyme C OS=Gallus gallus GN=LYZ PE=1 SV=1	collision-induced dissociation	012171745buch_m_cid.4413.4413.2	controllerType=0 controllerNumber=1 scan=4413	24.582		1107.53	1107.53	946.485	946.669	8.694	0.184235	929.458	929.458		0	904.463	904.463		0	473.746	473.732	1424	-0.0141707	465.233				444.222
			2417		92	R.NLC[+170.14190]NIPC[+162.05282]SALLS.S		C3(QAT / 170.1419); C7(Hex / 162.0528)	0.0114	197.9	2	790.409	790.407	1579.81	1579.81	2.93995		CRagged	197.916	7.22129	>sp|P00698|LYSC_CHICK Lysozyme C OS=Gallus gallus GN=LYZ PE=1 SV=1	collision-induced dissociation	012171745buch_m_cid.9261.9261.2	controllerType=0 controllerNumber=1 scan=9261	51.3031		1578.8	1578.8	1417.75	not obs.			1400.73	1400.73		0	1375.73	1375.73		0	709.381	709.595	566.8	0.214584	700.867				679.857
			8210	rezygnuję♥	92	R.NLC[+170.14190]NIPC[+162.05282]SALLSSDITA.S		C3(QAT / 170.1419); C7(Hex / 162.0528)	0.000252	244.5	2	1034.02	1034.02	2067.04	2067.03	1.66064		CRagged	244.512	44.5652	>sp|P00698|LYSC_CHICK Lysozyme C OS=Gallus gallus GN=LYZ PE=1 SV=1	collision-induced dissociation	012171745buch_m_cid.12513.12513.2	controllerType=0 controllerNumber=1 scan=12513	70.1204		2066.03	2066.03	1904.98	NA			1887.96	1887.96		0	1862.96	1862.96		0	952.995	952.944	193.9	-0.0503257	944.481				923.47
			6491	rezygnuje	99	C.[+43.00581]SALLSSDITASVN[+0.98402]C[+162.05282]AK.K		NTerm(Carbamyl / 43.0058); N13(Deamidated / 0.984); C14(Hex / 162.0528)	2.9e-05	357.1	2	893.426	893.425	1785.85	1785.84	1.84458		NRagged	321.405	321.405	>sp|P00698|LYSC_CHICK Lysozyme C OS=Gallus gallus GN=LYZ PE=1 SV=1	collision-induced dissociation	012171745buch_m_cid.10590.10590.2	controllerType=0 controllerNumber=1 scan=10590	58.9907		1784.84	1784.83	1623.79			-1623.79	1606.76	1606.76		0	1581.77	1581.77		0	812.398			-812.398	803.885				782.874
			754	C-term K	23	G.RC[+162.05282]ELAAAMK.R		C2(Hex / 162.0528)	0.0279	144.4	2	577.778	577.781	1154.55	1154.55	-5.59125		NRagged	7.53264	7.53264	>sp|P00698|LYSC_CHICK Lysozyme C OS=Gallus gallus GN=LYZ PE=1 SV=1	collision-induced dissociation	00527771buch_ab4liz2_s.3674.3674.2	controllerType=0 controllerNumber=1 scan=3674	24.6012		1153.54	1153.55	992.502	992.695	14850	0.193625	975.475	975.475		0	950.48	950.48		0	496.754	497.03	424800	0.275874	488.241	488.434	28370	0.192661	467.23
			222	1	24	R.C[+162.05282]ELAAAMK.R		C1(Hex / 162.0528)	0.00102	147.1	2	499.727	499.73	998.448	998.453	-5.77078		Specific	147.123	147.123	>sp|P00698|LYSC_CHICK Lysozyme C OS=Gallus gallus GN=LYZ PE=1 SV=1	collision-induced dissociation	00527771buch_ab4liz2_s.3991.3991.2	controllerType=0 controllerNumber=1 scan=3991	25.8018		997.44	997.446	836.4	836.567	42400	0.166835	819.374	819.552	477.1	0.177709	794.379	not obs.			418.704	418.941	299200	0.237229	410.191	410.003	8292	-0.187284	389.18
			1684	1	42	Y.SLGNWVC[+162.05282]AAK.F		C7(Hex / 162.0528)	4.89e-07	377.6	2	605.789	605.792	1210.57	1210.58	-5.66278		NRagged	377.564	377.564	>sp|P00698|LYSC_CHICK Lysozyme C OS=Gallus gallus GN=LYZ PE=1 SV=1	collision-induced dissociation	00527771buch_ab4liz2_s.6821.6821.2	controllerType=0 controllerNumber=1 scan=6821	35.4948		1209.56	1209.57	1048.52	1048.68	17230	0.152975	1031.5	1031.5		0	1006.5	1006.5		0	524.766	524.886	652900	0.120649	516.253	516.123	6677	-0.129664	495.242
			1189	1	80	R.WWC[+162.05282]NDGR.T		C3(Hex / 162.0528)	6.12e-05	192.2	2	549.716	549.719	1098.43	1098.43	-4.72158		Specific	192.249	192.249	>sp|P00698|LYSC_CHICK Lysozyme C OS=Gallus gallus GN=LYZ PE=1 SV=1	collision-induced dissociation	00527771buch_ab4liz2_s.5183.5183.2	controllerType=0 controllerNumber=1 scan=5183	29.9908		1097.42	1097.42	936.378	936.496	182500	0.118395	919.352	919.352		0	894.356	894.356		0	468.693	468.861	6396000	0.167809	460.179	460.346	3224000	0.166696	439.168
			1603	1	133	R.C[+162.05282]KGTDVQAWIR.G		C1(Hex / 162.0528)	1.88e-05	354.2	2	719.85	719.853	1438.69	1438.7	-4.10461		Specific	354.198	354.198	>sp|P00698|LYSC_CHICK Lysozyme C OS=Gallus gallus GN=LYZ PE=1 SV=1	collision-induced dissociation	00527771buch_ab4liz2_s.6474.6474.2	controllerType=0 controllerNumber=1 scan=6474	34.2918		1437.69	1437.69	1276.65	1276.76	9230	0.110735	1259.62	1259.62		0	1234.62	1234.62		0	638.827	639.16	1848000	0.332929	630.314	630.197	143200	-0.116284	609.303
			18335	R_HCD	133	R.C[+162.05282]KGTDVQAWIR.G		C1(Hex / 162.0528)	1.42e-07	388.6	2	719.85	719.853	1438.69	1438.7	-4.10461		Specific	388.613	388.613	>sp|P00698|LYSC_CHICK Lysozyme C OS=Gallus gallus GN=LYZ PE=1 SV=1	high-energy collision-induced dissociation	00527771buch_ab4liz2_s.6473.6473.2	controllerType=0 controllerNumber=1 scan=6473	34.2889		1437.69	1437.69	1276.65				1259.62				1234.62				638.827	638.827	4867	0	630.314				609.303
																																							PID	1606	a5	639.097	1861000	0.270229	179/z2	630.338	107800	0.0239163
																												1196.55
																												162.053	mh_Glc2
			1664	C	40	R.GYSLGNWVC[+162.05282]AAK.F_TEMPLATE		C9(Hex / 162.0528)	9.88e-08	535	2	715.836	715.835	1430.66	1430.66	1.66148		Specific	534.983	534.983	>sp|P00698|LYSC_CHICK Lysozyme C OS=Gallus gallus GN=LYZ PE=1 SV=1	collision-induced dissociation	012171745buch_m_cid.9501.9501.2	controllerType=0 controllerNumber=1 scan=9501	52.6735		1429.66	1429.65	1268.61	1268.58	175.3	-0.0267155									634.808	635.065	18090	0.257154	715.835				715.835
			1563/2157	C	40	R.GYSLGNWVC[+162.05282]AAK.F		C9(Hex / 162.0528)	9.88e-08	535	2	715.836	715.835	1430.66	1430.66	1.66148		Specific	534.983	534.983	>sp|P00698|LYSC_CHICK Lysozyme C OS=Gallus gallus GN=LYZ PE=1 SV=1	collision-induced dissociation	012171745buch_m_cid.9501.9501.2	controllerType=0 controllerNumber=1 scan=9501	52.6735		1429.66	1429.65	1268.61	1268.78	25430	0.172185									634.808	635.057	5144000	0.248554	715.835				715.835
																																											4826000
			1558/2154
																													Korekta obl.
																																	from				from				from				from				Hex+Guanidine
																																	MH	Arg			MH	Arg			precursor				precursor				loss
																																	ion				ion				ion				ion
																													162 NL	162 NL	intensity	err tol	179NL	179 NL			204NL	204 NL			162 NL/z	162 NL	intensity	err tol	179NL/z				221 NL/z
			PID	Prot. Rank	Pos.	Sequence (46)	Glycans	Mods (variable)	PEP	Score	z	Obs. m/z	Calc. m/z	Obs. MH	Calc. MH	ppm err.	Off- By-X	Cleavage	Delta Score	Delta Mod. Score	Protein Name	Fragment Type	Comment	Scan #	Scan Time	Glycans Pos.	Obs.M	Calc.M	calc	obs		0.500 Da	calc	obs			calc	obs			calc	obs		0.500 Da	calc				calc.
			26284		92	R.NLC[+162.05282]NIPC[+170.14190]SALLSSDITASVNC[-33.98772]AK.K		C3(Hex / 162.0528); C7(QAT / 170.1419); C21(Cys->Dha / -33.9877)	2.29e-06	244.3	3	879.119	879.115	2635.34	2635.33	3.76471		Specific	244.297	24.6789	>sp|P00698|LYSC_CHICK Lysozyme C OS=Gallus gallus GN=LYZ PE=1 SV=1	collision-induced dissociation	00715jasio_1cid.14747.14747.3	controllerType=0 controllerNumber=1 scan=14747	70.22		2634.33	2634.32	2473.28	NA			2456.25	2456.25			2431.26	2431.26			825.098	825.364	35640	0.266491	819.422			-819.422	805.415
			27267		92	R.NLC[-33.98772]NIPC[+170.14190]SALLSSDITASVNC[+162.05282]AK.K		C3(Cys->Dha / -33.9877); C7(QAT / 170.1419); C21(Hex / 162.0528)	1.74e-06	280.3	3	879.117	879.115	2635.34	2635.33	2.35611		Specific	280.275	80.6109	>sp|P00698|LYSC_CHICK Lysozyme C OS=Gallus gallus GN=LYZ PE=1 SV=1	collision-induced dissociation	00715jasio_1cid.15519.15519.3	controllerType=0 controllerNumber=1 scan=15519	73.7519		2634.33	2634.32	2473.28	NA			2456.25	2456.25			2431.26	2431.26			825.098	824.82	27860	-0.278109	819.422			-819.422	805.415
			22719		24	R.C[+162.05282]ELAAAMKRHGLDNYR.G		C1(Hex / 162.0528)	0.00228	206.3	3	670.658	670.656	2009.96	2009.95	3.64734		Specific	206.337	206.337	>sp|P00698|LYSC_CHICK Lysozyme C OS=Gallus gallus GN=LYZ PE=1 SV=1	collision-induced dissociation	00715jasio_3cid.6371.6371.3	controllerType=0 controllerNumber=1 scan=6371	33.0098		2008.95	2008.95	1847.9	not obs.			1830.87	1830.87			1805.88	1805.88			616.638	616.882	4242000	0.244111	610.963			-610.963	596.955
			25077		92	R.NLC[-33.98772]NIPC[+162.05282]SALLSSDITASVNC[+170.14190]AK.K		C3(Cys->Dha / -33.9877); C7(Hex / 162.0528); C21(QAT / 170.1419)	1.72e-05	300.7	3	879.117	879.115	2635.34	2635.33	2.07819		Specific	300.728	45.5078	>sp|P00698|LYSC_CHICK Lysozyme C OS=Gallus gallus GN=LYZ PE=1 SV=1	collision-induced dissociation	00715jasio_3cid.15415.15415.3	controllerType=0 controllerNumber=1 scan=15415	73.8982		2634.33	2634.32	2473.28	NA			2456.25	2456.25			2431.26	2431.26			825.098	825.548	208100	0.450191	819.422			-819.422	805.415
			2635		20	K.VFGRC[+162.05282]ELAAAMK.R		C5(Hex / 162.0528)	0.00292	156.1	3	486.575	486.576	1457.71	1457.71	-1.03051		Specific	156.139	156.139	>sp|P00698|LYSC_CHICK Lysozyme C OS=Gallus gallus GN=LYZ PE=1 SV=1	collision-induced dissociation	012171746buch_d_cid.6796.6796.3	controllerType=0 controllerNumber=1 scan=6796	36.6212		1456.7	1456.71	1295.66	not obs.		main sig.	1278.63	1278.63			1253.64	1253.64			432.558	432.913	280300	0.355064	426.883			-426.883	412.875
			22875	G	64	R.NTDGSTDYGILQIN[+0.98402]SRWWC[+162.05282]NDGR.T		N14(Deamidated / 0.984); C19(Hex / 162.0528)	5.66e-12	788.4	3	945.421	945.416	2834.25	2834.23	5.62869		Specific	788.385	24.0714	>sp|P00698|LYSC_CHICK Lysozyme C OS=Gallus gallus GN=LYZ PE=1 SV=1	collision-induced dissociation	012171746buch_d_cid.13211.13211.3	controllerType=0 controllerNumber=1 scan=13211	72.2227		2833.24	2833.22	2672.18	NA			2655.15	2655.15			2630.16	2630.16			891.398	891.796	1757	0.398316	885.722			-885.722	871.715
			3741		80	R.WWC[+162.05282]N[+0.98402]DGRTPGSR.N		C3(Hex / 162.0528); N4(Deamidated / 0.984)	0.0031	276.4	3	533.225	533.228	1597.66	1597.67	-5.43274		Specific	276.424	276.424	>sp|P00698|LYSC_CHICK Lysozyme C OS=Gallus gallus GN=LYZ PE=1 SV=1	collision-induced dissociation	012171746buch_d_cid.5039.5039.3	controllerType=0 controllerNumber=1 scan=5039	27.2546		1596.65	1596.66	1435.62	not obs.			1418.59	1418.59			1393.6	1393.6			479.211	479.379	8673	0.168229	473.535			-473.535	459.528
			3779	F	131	R.NRC[+162.05282]KGTDVQAWIR.G		C3(Hex / 162.0528)	0.00391	278	3	570.285	570.286	1708.84	1708.84	-2.36749		Specific	277.961	277.961	>sp|P00698|LYSC_CHICK Lysozyme C OS=Gallus gallus GN=LYZ PE=1 SV=1	collision-induced dissociation	012171746buch_d_cid.5512.5512.3	controllerType=0 controllerNumber=1 scan=5512	29.7588		1707.83	1707.84	1546.79	NA		main sig.	1529.76	1529.76			1504.77	1504.77			516.268	516.596	37000	0.327881	510.593			-510.593	496.586
			3881		131	R.N[+0.98402]RC[+162.05282]KGTDVQAWIR.G		N1(Deamidated / 0.984); C3(Hex / 162.0528)	0.000664	309.7	3	570.613	570.614	1709.83	1709.83	-1.36351		Specific	309.716	309.716	>sp|P00698|LYSC_CHICK Lysozyme C OS=Gallus gallus GN=LYZ PE=1 SV=1	collision-induced dissociation	012171746buch_d_cid.6497.6497.3	controllerType=0 controllerNumber=1 scan=6497	34.996		1708.82	1708.82	1547.77	NA			1530.75	1530.75			1505.75	1505.75			516.596	516.923	70270	0.326276	510.921			-510.921	496.914
			4123		131	R.N[+0.98402]RC[+162.05282]K[+43.00581]GTDVQAWIR.G		N1(Deamidated / 0.984); C3(Hex / 162.0528); K4(Carbamyl / 43.0058)	0.000586	248.4	3	584.95	584.949	1752.84	1752.83	1.58254		Specific	248.426	61.8939	>sp|P00698|LYSC_CHICK Lysozyme C OS=Gallus gallus GN=LYZ PE=1 SV=1	collision-induced dissociation	012171746buch_d_cid.8159.8159.3	controllerType=0 controllerNumber=1 scan=8159	44.1403		1751.83	1751.83	1590.78	not obs.			1573.75	1573.75			1548.76	1548.76			530.932	531.117	10960	0.185204	525.256			-525.256	511.249
			2655	A	135	K.GTDVQAWIRGC[+162.05282]R.L		C11(Hex / 162.0528)	0.000304	288.4	3	508.58	508.581	1523.72	1523.73	-1.71186		Specific	188.971	188.971	>sp|P00698|LYSC_CHICK Lysozyme C OS=Gallus gallus GN=LYZ PE=1 SV=1	collision-induced dissociation	012171746buch_d_cid.6972.6972.3	controllerType=0 controllerNumber=1 scan=6972	37.6022		1522.72	1522.72	1361.67	not obs.	454.256	867.7	1344.65	1344.65			1319.65	1319.65			454.563	454.934	4945	0.370658	448.887			-448.887	434.88
			29027		58	N.[+43.00581]TQ[+0.98402]ATNRNTDGSTDYGILQINSRWWC[+162.05282]NDGR.T		NTerm(Carbamyl / 43.0058); Q2(Deamidated / 0.984); C25(Hex / 162.0528)	0.429	230.8	3	1183.53	1183.53	3548.58	3548.57	2.77796		NRagged	212.644	29.0279	>sp|P00698|LYSC_CHICK Lysozyme C OS=Gallus gallus GN=LYZ PE=1 SV=1	collision-induced dissociation	012171745buch_m_cid.13012.13012.3	controllerType=0 controllerNumber=1 scan=13012	73.0261		3547.58	3547.57	3386.52	NA			3369.49	3369.49			3344.5	3344.5			1129.51	1129.1	59.1	-0.415519	1123.84			-1123.84	1109.83
			17169	D	64	R.N[+0.98402]TDGSTDYGILQINSRWWC[+162.05282]NDGR.T		N1(Deamidated / 0.984); C19(Hex / 162.0528)	4.78e-06	529.9	3	945.416	945.416	2834.23	2834.23	0.174324		Specific	529.898	24.553	>sp|P00698|LYSC_CHICK Lysozyme C OS=Gallus gallus GN=LYZ PE=1 SV=1	collision-induced dissociation	012171745buch_m_cid.12767.12767.3	controllerType=0 controllerNumber=1 scan=12767	71.6046		2833.23	2833.22	2672.18	NA			2655.15	2655.15			2630.16	2630.16			891.398	891.2	793.7	-0.198384	885.722			-885.722	871.715
			17269		64	R.NTDGSTDYGILQIN[+0.98402]SRWWC[+162.05282]N[+0.98402]DGR.T		N14(Deamidated / 0.984); C19(Hex / 162.0528); N20(Deamidated / 0.984)	1.04e-10	690.2	3	945.747	945.744	2835.23	2835.22	3.83587		Specific	690.239	57.879	>sp|P00698|LYSC_CHICK Lysozyme C OS=Gallus gallus GN=LYZ PE=1 SV=1	collision-induced dissociation	012171745buch_m_cid.13609.13609.3	controllerType=0 controllerNumber=1 scan=13609	76.5203		2834.22	2834.21	2673.16	NA			2656.14	2656.14			2631.14	2631.14			891.726	891.524	569.5	-0.20209	886.05			-886.05	872.043
			17210	Ga	64	R.NTDGSTDYGILQINSRWWC[+162.05282]N[+0.98402]DGR.T		C19(Hex / 162.0528); N20(Deamidated / 0.984)	1.04e-12	776.8	3	945.419	945.416	2834.24	2834.23	3.20127		Specific	776.759	42.4704	>sp|P00698|LYSC_CHICK Lysozyme C OS=Gallus gallus GN=LYZ PE=1 SV=1	collision-induced dissociation	012171745buch_m_cid.13028.13028.3	controllerType=0 controllerNumber=1 scan=13028	73.1165		2833.23	2833.22	2672.18	NA			2655.15	2655.15			2630.16	2630.16			891.398	891.554	1299	0.156516	885.722			-885.722	871.715
			16138		65	N.[+43.00581]TDGSTDYGILQIN[+0.98402]SRWWC[+162.05282]N[+0.98402]DGR.T		NTerm(Carbamyl / 43.0058); N13(Deamidated / 0.984); C18(Hex / 162.0528); N19(Deamidated / 0.984)	1.24e-05	413.7	3	922.066	922.065	2764.18	2764.18	1.63578		NRagged	413.724	6.46307	>sp|P00698|LYSC_CHICK Lysozyme C OS=Gallus gallus GN=LYZ PE=1 SV=1	collision-induced dissociation	012171745buch_m_cid.15095.15095.3	controllerType=0 controllerNumber=1 scan=15095	85.2123		2763.18	2763.17	2602.13			-2602.13	2585.1	2585.1			2560.1	2560.1			868.047			-868.047	862.371			-862.371	848.364
			16145		65	N.[+43.00581]TDGSTDYGILQINSRWWC[+162.05282]N[+0.98402]DGR.T		NTerm(Carbamyl / 43.0058); C18(Hex / 162.0528); N19(Deamidated / 0.984)	0.000129	385.1	3	921.735	921.737	2763.19	2763.2	-1.86533		NRagged	385.129	29.9769	>sp|P00698|LYSC_CHICK Lysozyme C OS=Gallus gallus GN=LYZ PE=1 SV=1	collision-induced dissociation	012171745buch_m_cid.15157.15157.3	controllerType=0 controllerNumber=1 scan=15157	85.5717		2762.18	2762.19	2601.14			-2601.14	2584.12	2584.12			2559.12	2559.12			867.719			-867.719	862.043			-862.043	848.036
			12346		65	N.TDGSTDYGILQIN[+0.98402]SRWWC[+162.05282]N[+0.98402]DGR.T		N13(Deamidated / 0.984); C18(Hex / 162.0528); N19(Deamidated / 0.984)	9.76e-06	498.5	3	907.734	907.729	2721.19	2721.17	4.6925		NRagged	460.257	77.517	>sp|P00698|LYSC_CHICK Lysozyme C OS=Gallus gallus GN=LYZ PE=1 SV=1	collision-induced dissociation	012171745buch_m_cid.13711.13711.3	controllerType=0 controllerNumber=1 scan=13711	77.1153		2720.18	2720.17	2559.12			-2559.12	2542.09	2542.09			2517.1	2517.1			853.712			-853.712	848.036			-848.036	834.029
			12233		65	N.TDGSTDYGILQIN[+0.98402]SRWWC[+162.05282]NDGR.T		N13(Deamidated / 0.984); C18(Hex / 162.0528)	2.76e-07	564.3	3	907.404	907.401	2720.2	2720.19	3.07278		NRagged	564.324	29.0761	>sp|P00698|LYSC_CHICK Lysozyme C OS=Gallus gallus GN=LYZ PE=1 SV=1	collision-induced dissociation	012171745buch_m_cid.13301.13301.3	controllerType=0 controllerNumber=1 scan=13301	74.7206		2719.19	2719.18	2558.14			-2558.14	2541.11	2541.11			2516.11	2516.11			853.384			-853.384	847.708			-847.708	833.701
			2011	H	80	R.WWC[+162.05282]NDGRTPGSR.N		C3(Hex / 162.0528)	0.00226	246.9	3	532.902	532.9	1596.69	1596.69	2.9918		Specific	246.936	246.936	>sp|P00698|LYSC_CHICK Lysozyme C OS=Gallus gallus GN=LYZ PE=1 SV=1	collision-induced dissociation	012171745buch_m_cid.4395.4395.3	controllerType=0 controllerNumber=1 scan=4395	24.482		1595.68	1595.68	1434.63	NA			1417.61	1417.61			1392.61	1392.61			478.883	479.018	4784	0.135034	473.207			-473.207	459.2
			16917		87	R.TPGSRNLC[+162.05282]NIPC[+162.05282]SALLSSDITASVN.C		C8(Hex / 162.0528); C12(Hex / 162.0528)	0.0207	229.2	3	953.12	953.12	2857.35	2857.34	0.843284		CRagged	229.239	229.239	>sp|P00698|LYSC_CHICK Lysozyme C OS=Gallus gallus GN=LYZ PE=1 SV=1	collision-induced dissociation	012171745buch_m_cid.11272.11272.3	controllerType=0 controllerNumber=1 scan=11272	62.8917		2856.34	2856.34	2695.29	NA			2678.26	2678.26			2653.27	2653.27			899.102	898.697	434.3	-0.404454	893.426			-893.426	879.419
			8039	E	92	R.NLC[+162.05282]NIPC[+170.14190]SALLSSDITASVN.C		C3(Hex / 162.0528); C7(QAT / 170.1419)	0.432	182.1	3	789.732	789.731	2367.18	2367.18	1.85488		CRagged	182.092	28.7932	>sp|P00698|LYSC_CHICK Lysozyme C OS=Gallus gallus GN=LYZ PE=1 SV=1	collision-induced dissociation	012171745buch_m_cid.11421.11421.3	controllerType=0 controllerNumber=1 scan=11421	63.7601		2366.18	2366.17	2205.13	NA			2188.1	2188.1			2163.1	2163.1			735.713	736.052	198.9	0.338901	730.038			-730.038	716.03
			16928		92	R.NLC[+170.14190]NIPC[+162.05282]SALLSSDITASVN[+0.98402]C[+162.05282]AK.K		C3(QAT / 170.1419); C7(Hex / 162.0528); N20(Deamidated / 0.984); C21(Hex / 162.0528)	0.000819	334.7	3	944.796	944.79	2832.37	2832.36	5.59975		Specific	308.282	6.74545	>sp|P00698|LYSC_CHICK Lysozyme C OS=Gallus gallus GN=LYZ PE=1 SV=1	collision-induced dissociation	012171745buch_m_cid.11477.11477.3	controllerType=0 controllerNumber=1 scan=11477	64.0784		2831.36	2831.35	2670.3	NA			2653.28	2653.28			2628.28	2628.28			890.773	890.722	1006	-0.0502625	885.097			-885.097	871.09
																																	-179.079	-179.079			-204.075	-204.075
					133	R.C[+162.05282]KGTDVQAWIR.G		C1(Hex / 162.0528)	0.000106	189.2	3	480.236	480.238	1438.69	1438.7	-4.62158		Specific	189.152	189.152	>sp|P00698|LYSC_CHICK Lysozyme C OS=Gallus gallus GN=LYZ PE=1 SV=1	collision-induced dissociation	00527771buch_ab4liz2_s.6485.6485.3	controllerType=0 controllerNumber=1 scan=6485	34.3257		1437.69	1437.69	1276.65	not obs.			1259.62	not obs.			1234.62	not obs.			426.22	426.442	103000	0.221116	420.545	420.788	45840	0.243219	406.538
															1.00728
														M2H	1439.71
																																									PID 1606	R.C[+162.05282]KGTDVQAWIR.G			z +3	CID FRAGMENTATION
			2635	Proc. 2	DMSO																								Korekta obl.				MH	Arg			MH	Arg			precursor				precursor	Arg			loss
																																	ion				ion				ion				ion
																													162 NL	162 NL	intensity	err tol	179NL	179 NL			204NL	204 NL			162 NL/z	162 NL	intensity	err tol	179NL/z	179 NL	intensity	err tol	221 NL/z
			PID	Prot. Rank	Pos.	Sequence (46)	Glycans	Mods (variable)	PEP	Score	z	Obs. m/z	Calc. m/z	Obs. MH	Calc. MH	ppm err.	Off- By-X	Cleavage	Delta Score	Delta Mod. Score	Protein Name	Fragment Type	Comment	Scan #	Scan Time	Glycans Pos.	Obs.M	Calc.M	calc	obs		#VALUE!	calc	obs			calc	obs			calc	obs			calc	obs			calc
			1603	1	133	R.C[+162.05282]KGTDVQAWIR.G		C1(Hex / 162.0528)	1.88e-05	354.2	2	719.85	719.853	1438.69	1438.7	-4.10461		Specific	354.198	354.198	>sp|P00698|LYSC_CHICK Lysozyme C OS=Gallus gallus GN=LYZ PE=1 SV=1	collision-induced dissociation	00527771buch_ab4liz2_s.6474.6474.2	controllerType=0 controllerNumber=1 scan=6474	34.2918		1437.69	1437.69	1276.65	1276.76	9230	0.110735	1259.62	not obs.		#VALUE!	1234.62	not obs.			638.827	639.16	1848000	0.332929	630.314	630.197	143200	-0.116284	609.303
										162/z	418.704	418.941	299200	0.237229	1
										120.042	439.709	439.949	68840	0.239359	0.23008
										179/z	410.191	410.003	8292	-0.187284	0.0277139
										90.0317	454.714	454.555	3868	-0.159723	0.0129278
										150 /z	424.704	425.159	715.8	0.455541	0.00239238
										204/z	397.693	397.431	117.4	-0.26226	0.00039238
										180/z	409.699	not obs.
										162mh	836.4	836.567	42400	0.166835	1
										179 mh	819.374	819.552	477.1	0.177709	0.0112524
										180mh	818.39	818.543	76.32	0.153415	0.0018
										204mh	794.379	not obs.
																																		221/z	406.538	406.788	6396	0.250794	#DIV/0!
			754	C-term K	23	G.RC[+162.05282]ELAAAMK.R		C2(Hex / 162.0528)	0.0279	144.4	2	577.778	577.781	1154.55	1154.55	-5.59125		NRagged	7.53264	7.53264	>sp|P00698|LYSC_CHICK Lysozyme C OS=Gallus gallus GN=LYZ PE=1 SV=1	collision-induced dissociation	00527771buch_ab4liz2_s.3674.3674.2	controllerType=0 controllerNumber=1 scan=3674	24.6012		1153.54	1153.55	992.502	992.695	14850	0.193625	975.475	975.475		0	950.48	950.48		0	496.754	497.03	424800	0.275874	488.241	488.434	28370	0.192661	467.23
			222	1	24	R.C[+162.05282]ELAAAMK.R		C1(Hex / 162.0528)	0.00102	147.1	2	499.727	499.73	998.448	998.453	-5.77078		Specific	147.123	147.123	>sp|P00698|LYSC_CHICK Lysozyme C OS=Gallus gallus GN=LYZ PE=1 SV=1	collision-induced dissociation	00527771buch_ab4liz2_s.3991.3991.2	controllerType=0 controllerNumber=1 scan=3991	25.8018		997.44	997.446	836.4	836.567	42400	0.166835	819.374	819.374		0	794.379	794.379		0	418.704	418.941	299200	0.237229	410.191	410.003	8292	-0.187284	389.18
			1684	1	42	Y.SLGNWVC[+162.05282]AAK.F		C7(Hex / 162.0528)	4.89e-07	377.6	2	605.789	605.792	1210.57	1210.58	-5.66278		NRagged	377.564	377.564	>sp|P00698|LYSC_CHICK Lysozyme C OS=Gallus gallus GN=LYZ PE=1 SV=1	collision-induced dissociation	00527771buch_ab4liz2_s.6821.6821.2	controllerType=0 controllerNumber=1 scan=6821	35.4948		1209.56	1209.57	1048.52	1048.68	17230	0.152975	1031.5	1031.5		0	1006.5	1006.5		0	524.766	524.886	652900	0.120649	516.253	516.123	6677	-0.129664	495.242
			1189	1	80	R.WWC[+162.05282]NDGR.T		C3(Hex / 162.0528)	6.12e-05	192.2	2	549.716	549.719	1098.43	1098.43	-4.72158		Specific	192.249	192.249	>sp|P00698|LYSC_CHICK Lysozyme C OS=Gallus gallus GN=LYZ PE=1 SV=1	collision-induced dissociation	00527771buch_ab4liz2_s.5183.5183.2	controllerType=0 controllerNumber=1 scan=5183	29.9908		1097.42	1097.42	936.378	936.496	182500	0.118395	919.352	919.352		0	894.356	894.356		0	468.693	468.861	6396000	0.167809	460.179	460.346	3224000	0.166696	439.168
			1603	1	133	R.C[+162.05282]KGTDVQAWIR.G		C1(Hex / 162.0528)	1.88e-05	354.2	2	719.85	719.853	1438.69	1438.7	-4.10461		Specific	354.198	354.198	>sp|P00698|LYSC_CHICK Lysozyme C OS=Gallus gallus GN=LYZ PE=1 SV=1	collision-induced dissociation	00527771buch_ab4liz2_s.6474.6474.2	controllerType=0 controllerNumber=1 scan=6474	34.2918		1437.69	1437.69	1276.65	1276.76	9230	0.110735	1259.62	1259.62		0	1234.62	1234.62		0	638.827	639.16	1848000	0.332929	630.314	630.197	143200	-0.116284	609.303
			34	6	24	R.CELAAAM[+31.98983]KR.H		M7(Dioxidation / 31.9898)	0.00662	106.9	2	512.748	512.749	1024.49	1024.49	-3.24117		SpeCifiC	106.885	106.885	>sp|P00698|LYSC_CHICK Lysozyme C OS=Gallus gallus GN=LYZ PE=1 SV=1	Collision-induCed dissoCiation	00527771buCh_ab4liz2_s.2324.2324.2	ControllerType=0 ControllerNumber=1 sCan=2324	19.4772		1023.48	1023.48	862.439	862.742	24.3	0.30362	845.412	845.412		0	820.417	820.417		0	431.723	431.305	139.9	-0.417828	423.21	423.576	98.38	0.366159	402.199
[truncated: 63 more columns]
